# Supplementary material for: An Immunoinformatics Approach to Design a Potent Multi-Epitope Vaccine against Asia-1 Genotype of Crimean–Congo Haemorrhagic Fever Virus Using the Structural Glycoproteins as a Target
Source: MDPI journal article supplement (doi:10.3390/vaccines11010061), 2022-12-27
Supplement: s1 [file s1]

# Supporting Information

## An Immunoinformatics Approach to Design a Potent Multi-Epitope Vaccine Against Asia-1 Genotype of Crimean-Congo Haemorrhagic Fever Virus Using the Structural Glycoproteins as a Target

Syed Zawar Shah<sup>1†</sup>, Basit Jabbar<sup>1</sup>, Muhammad Usman Mirza<sup>2</sup>, Muhammad Waqas<sup>3,4†</sup>, Shahkaar Aziz<sup>5</sup>, Sobia Ahsan Halim<sup>4</sup>, Amjad Ali<sup>3\*</sup>, Shazia Rafique<sup>1</sup>, Muhammad Idrees<sup>1</sup>, Asaad Khalid<sup>6,7</sup>, Ashraf N. Abdalla<sup>8</sup>, Ajmal Khan<sup>4\*</sup>, and Ahmed Al-Harrasi<sup>4\*</sup>

1. Centre of Excellence in Molecular Biology, University of the Punjab, 53700, Punjab, Pakistan

2. Department of Chemistry and Biochemistry, University of Windsor, ON, Canada

3. Department of Biotechnology and Genetic Engineering, Hazara University Mansehra 21120, Mansehra, Pakistan

4. Natural and Medical Sciences Research Center, University of Nizwa, Birkat-ul-Mouz 616, Nizwa, Oman

5. Institute of Biotechnology and Genetic Engineering, the University of Agriculture Peshawar, Pakistan

6. Substance Abuse and Toxicology Research Center, Jazan University, P.O. Box: 114, Jazan 45142, Saudi Arabia

7. Medicinal and Aromatic Plants and Traditional Medicine Research Institute, National Center for Research, P. O. Box 2404, Khartoum, Sudan

8. Department of Pharmacology and Toxicology, College of Pharmacy, Umm Al-Qura University, Makkah 21955, Saudi Arabia

†These authors have contributed equally to this work.

\* Correspondence: amjad.camb@pu.edu.pk (A.A.); ajmalkhan@unizwa.edu.om (A.K); aharrasi@unizwa.edu.om (A.A-H)

### Table of content

- Figure S1** In silico immune simulation of an infection challenge, comprised of a virus responding to the sequence of Asia-1 genotype of CCHFV proteins covered by the multi-epitope construct, was simulated on day 350. (A) B lymphocytes population per entity-state (i.e., showing counts for active, presenting on class II, internalized the Ag, duplicating and anergic (B) Plasma B lymphocytes count sub-divided per isotype (IgM, IgG1 and IgG2) (C) CD4+ T-helper (TH) lymphocytes in several forms, i.e., active, duplicating (in the mitotic cycle), resting (not active), and anergic (D) CD4 T-regulatory lymphocytes count. Both total, memory and per entity-state counts are plotted here (E) Total count, internalized, presenting on MHC class-II, active and resting macrophages. (F) Dendritic cells can present antigenic peptides on both MHC class-I and class-II molecules. The curves show the total number broken down to active, resting, internalized, and presenting the ag.
- Figure S2** Root Mean Square Deviation (RMSD) analysis of the selected epitopes (KQNDRCTLV, FLWFSGY, YLLIVGTL, LLTVSLSPV, FVLGSILFI) docked with

the HLA-A\*0201 molecule and epitope TEAIVCVEL docked with HLA-B\*4402 molecule. The 3L3D (EEAGRAFSF and HLA-B\*4402 complex) and 5HHP (GILEFVFTL and HLA-A\*0201 complex) were selected as reference systems.

|                 |                                                                                                                                                                                       |
|-----------------|---------------------------------------------------------------------------------------------------------------------------------------------------------------------------------------|
| <b>Table S1</b> | Population coverage calculation result                                                                                                                                                |
| <b>Table S2</b> | GalaxyRefine output for the submitted initial model of vaccine constructs predicted by the I-TASSER server. (Letter in bold indicates the final model selected for further analysis). |
| <b>Table S3</b> | Docking score (DS) and RMSD of the selected peptides with the HLA-B*4402 and HLA-A*0201 alleles.                                                                                      |
| <b>Table S4</b> | Molecular docking calculations and interactions details between selected CTL epitopes and respective HLA class I allele.                                                              |
| <b>Table S5</b> | Molecular docking between selected CTL peptides and mouse MHC-I molecules                                                                                                             |
| <b>Table S6</b> | Atom-atom interactions across TLR2–designed vaccine construct interface obtained using PDBsum server                                                                                  |
| <b>Table S7</b> | Atom-atom interactions across TLR3–designed vaccine construct interface obtained using PDBsum server                                                                                  |
| <b>Table S8</b> | Atom-atom interactions across TLR4–designed vaccine construct interface obtained using PDBsum server                                                                                  |
| <b>Table S9</b> | Fraction of hydrogen bonds at the designed vaccine construct–TLRs interface during the 100ns simulation timescale (with occupancy $\geq 2\%$ )                                        |

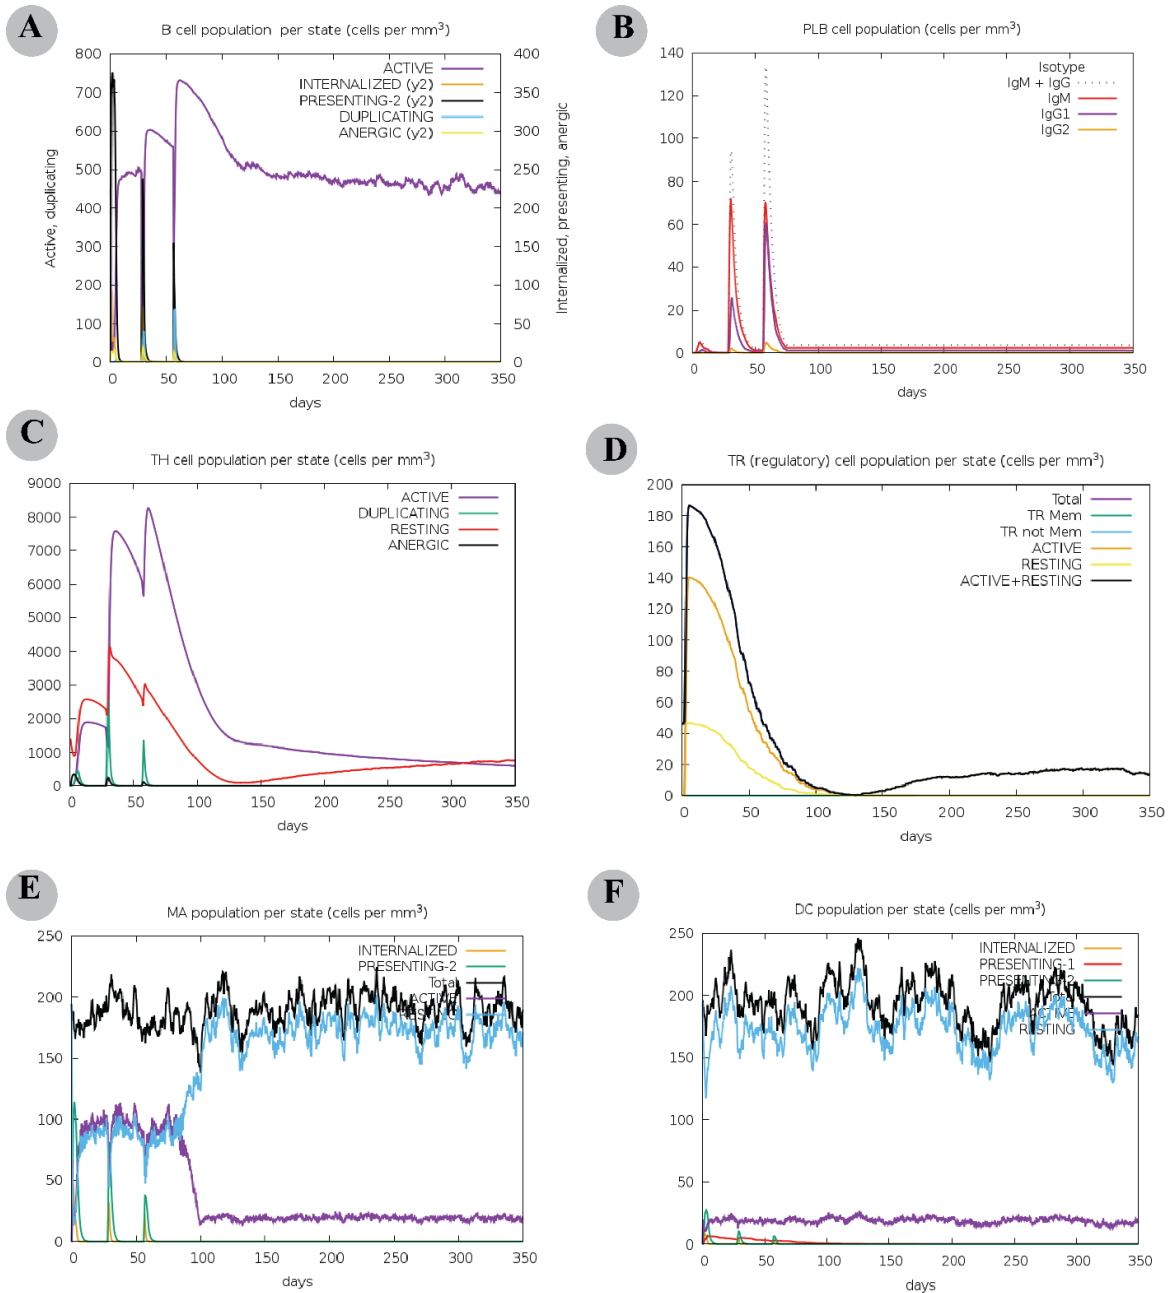

**Figure S1.** *In silico* immune simulation of an infection challenge, comprised of a virus responding to the sequence of Asia-1 genotype of CCHFV proteins covered by the multi-epitope construct, was simulated on day 350. **(A)** B lymphocytes population per entity-state (i.e., showing counts for active, presenting on class II, internalized the Ag, duplicating and anergic) **(B)** Plasma B lymphocytes count sub-divided per isotype (IgM, IgG1 and IgG2) **(C)** CD4<sup>+</sup> T-helper (TH) lymphocytes in several forms, i.e., active, duplicating (in the mitotic cycle), resting (not active), and anergic **(D)** CD4 T-regulatory lymphocytes count. Both total, memory and per entity-state counts are plotted here **(E)** Total count, internalized, presenting on MHC class-II, active and resting macrophages. **(F)** Dendritic cells can present antigenic peptides on both MHC class-I and class-II molecules. The curves show the total number broken down to active, resting, internalized, and presenting the ag.

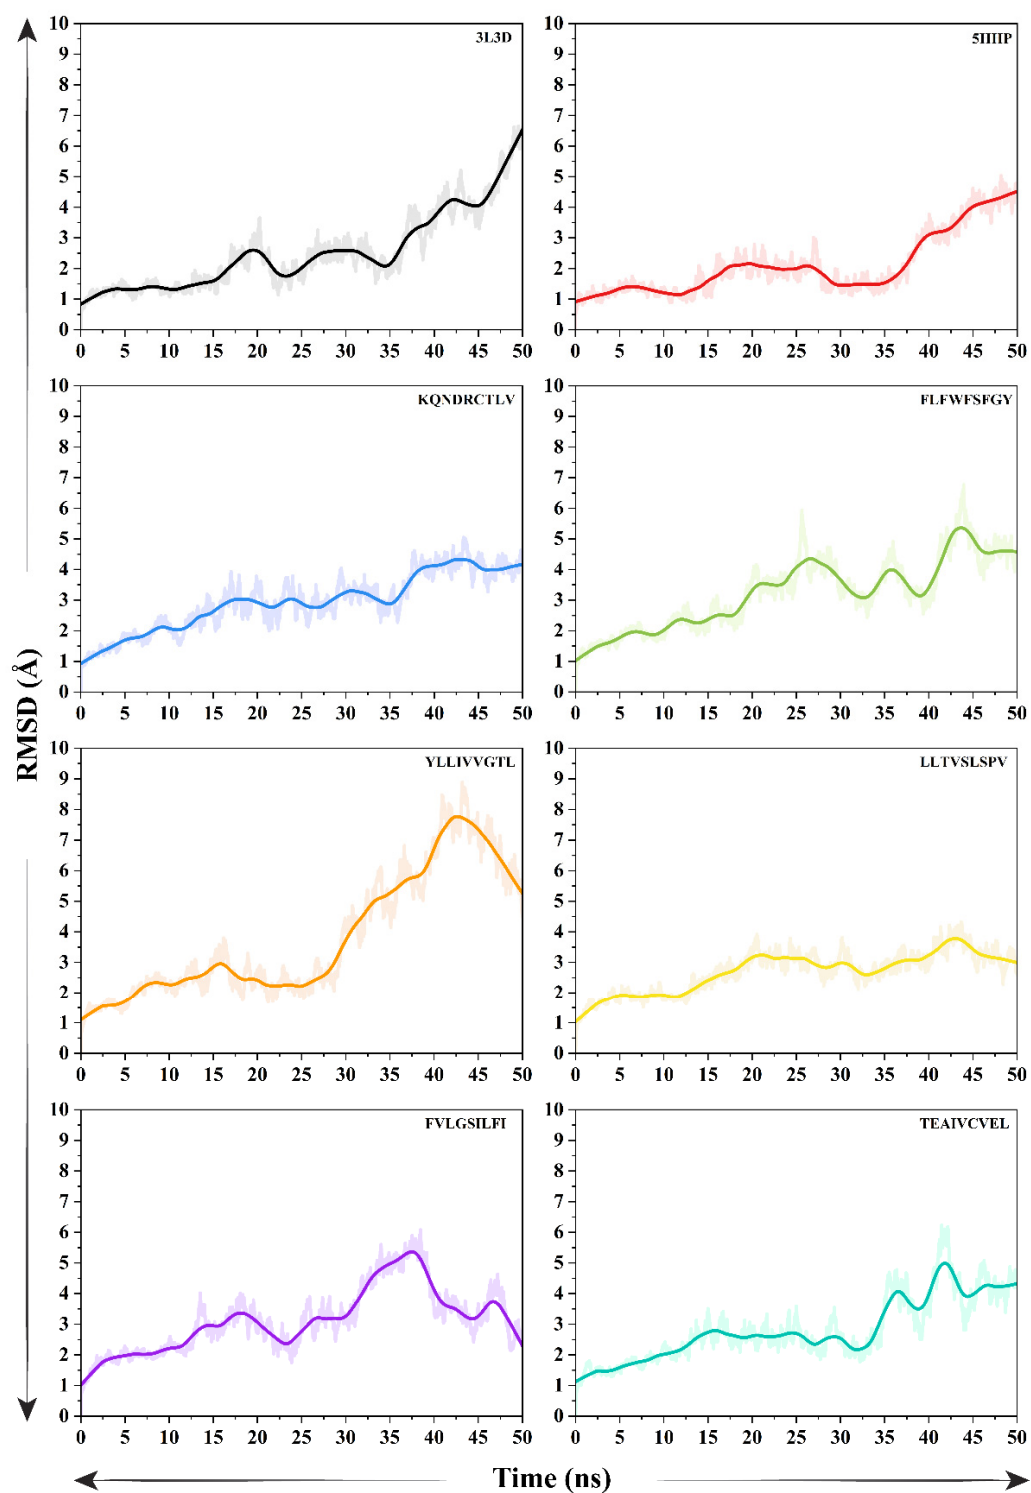

**Figure S2.** Root Mean Square Deviation (RMSD) analysis of the selected epitopes (KQNDRCTLV, FLFWFSFGY, YLLIVVGTL, LLTVSLSPV, FVLGSILFI) docked with the HLA-A\*0201 molecule and epitope TEAIVCVEL docked with HLA-B\*4402 molecule. The 3L3D (EEAGRAFSF and HLA-B\*4402 complex) and 5HHP (GILEFVFTL and HLA-A\*0201 complex) were selected as reference systems.

**Table S1.** Population coverage calculation result

|                                                                                                    | Class I               |                          |                   |
|----------------------------------------------------------------------------------------------------|-----------------------|--------------------------|-------------------|
| population/area                                                                                    | coverage <sup>a</sup> | average hit <sup>b</sup> | pc90 <sup>c</sup> |
| East Asia                                                                                          | 35.99%                | 1.43                     | 0.16              |
| Northeast Asia                                                                                     | 30.33%                | 1.5                      | 0.14              |
| Pakistan                                                                                           | 49.85%                | 1.56                     | 0.71              |
| South Asia                                                                                         | 31.98%                | 1.44                     | 0.15              |
| Northeast Asia                                                                                     | 29.51%                | 1.44                     | 0.14              |
| Southeast Asia                                                                                     | 45.54%                | 2.28                     | 0.18              |
| World                                                                                              | 60.52%                | 3.07                     | 0.25              |
| <sup>a</sup> projected population coverage                                                         |                       |                          |                   |
| <sup>b</sup> average number of epitope hits / HLA combinations recognized by the population        |                       |                          |                   |
| <sup>c</sup> minimum number of epitope hits / HLA combinations recognized by 90% of the population |                       |                          |                   |

**Table S2.** GalaxyRefine output for the submitted initial model of vaccine constructs predicted by the I-TASSER server. (Letter in bold indicates the final model selected for further analysis).

| Model          | GDT-HA | RMSD  | MolProbity | Clash score | Poor rotamers | Rama favored |
|----------------|--------|-------|------------|-------------|---------------|--------------|
| Initial        | 1.0000 | 0.000 | 3.227      | 9.7         | 13.2          | 66.8         |
| MODEL 1        | 0.9275 | 0.469 | 2.423      | 20.6        | 0.8           | 87.3         |
| MODEL 2        | 0.9360 | 0.471 | 2.494      | 25.4        | 0.8           | 87.9         |
| <b>MODEL 3</b> | 0.9267 | 0.463 | 2.501      | 24.5        | 0.8           | 87.0         |
| MODEL 4        | 0.9174 | 0.490 | 2.498      | 24.7        | 0.8           | 87.3         |
| MODEL 5        | 0.9282 | 0.471 | 2.438      | 20.4        | 0.8           | 86.3         |

**Table S3.** Docking score (DS) and RMSD of the selected peptides with the HLA-B\*4402 and HLA-A\*0201 alleles.

| Peptide          | Allele     | Docking Score (Kcal/mol) | RMSD (Å) |
|------------------|------------|--------------------------|----------|
| EEAGRAFSF (3L3D) | HLA-B*4402 | -108.89                  | 0.416    |
| GILEFVFTL (5HHP) | HLA-A*0201 | -40.53                   | 0.900    |
| KQNDRCTLV        | HLA-A*0201 | -60.21                   | 0.825    |
| FLFWFSFGY        | HLA-A*0201 | -56.85                   | 1.140    |
| YLLIVVGTL        | HLA-A*0201 | -37.35                   | 0.570    |
| LLTVSLSPV        | HLA-A*0201 | -53.81                   | 0.767    |
| FVLGSILFI        | HLA-A*0201 | -55.69                   | 0.457    |
| TEAIVCVEL        | HLA-B*4402 | -37.83                   | 0.819    |

**Table S4.** Molecular docking calculations and interactions details between selected CTL epitopes and respective HLA class I allele.

| Peptide                                                                                                                                                                                                                                                                                   | Receptor Atoms | Receptor Residues | Receptor residues No | Peptide Atoms                                                                                 | Peptide Resides | Peptide residue No | Distance (Å) |
|-------------------------------------------------------------------------------------------------------------------------------------------------------------------------------------------------------------------------------------------------------------------------------------------|----------------|-------------------|----------------------|-----------------------------------------------------------------------------------------------|-----------------|--------------------|--------------|
| 3L3D                                                                                                                                                                                                                                                                                      | OH             | TYR               | 7                    | N                                                                                             | GLU             | 1                  | 3.1          |
|                                                                                                                                                                                                                                                                                           | OH             | TYR               | 9                    | OE1                                                                                           | GLU             | 2                  | 2.55         |
|                                                                                                                                                                                                                                                                                           | NZ             | LYS               | 45                   | OE2                                                                                           | GLU             | 2                  | 2.73         |
|                                                                                                                                                                                                                                                                                           | NH2            | ARG               | 62                   | OE1                                                                                           | GLU             | 1                  | 3.02         |
|                                                                                                                                                                                                                                                                                           | OE2            | GLU               | 63                   | N                                                                                             | GLU             | 2                  | 2.91         |
|                                                                                                                                                                                                                                                                                           | OD1            | ASN               | 70                   | N                                                                                             | ALA             | 6                  | 3            |
|                                                                                                                                                                                                                                                                                           | OD1            | ASN               | 77                   | N                                                                                             | PHE             | 9                  | 2.74         |
|                                                                                                                                                                                                                                                                                           | OH             | TYR               | 84                   | O                                                                                             | PHE             | 9                  | 2.66         |
|                                                                                                                                                                                                                                                                                           | OH             | TYR               | 99                   | OE1                                                                                           | GLU             | 2                  | 2.51         |
|                                                                                                                                                                                                                                                                                           | OH             | TYR               | 99                   | N                                                                                             | ALA             | 3                  | 3.05         |
|                                                                                                                                                                                                                                                                                           | OG1            | THR               | 143                  | O                                                                                             | PHE             | 9                  | 2.67         |
|                                                                                                                                                                                                                                                                                           | NZ             | LYS               | 146                  | OXT                                                                                           | PHE             | 9                  | 2.83         |
|                                                                                                                                                                                                                                                                                           | NE1            | TRP               | 147                  | O                                                                                             | SER             | 8                  | 2.83         |
|                                                                                                                                                                                                                                                                                           | OH             | TYR               | 159                  | O                                                                                             | GLU             | 1                  | 2.6          |
|                                                                                                                                                                                                                                                                                           | OG             | SER               | 167                  | N                                                                                             | GLU             | 1                  | 3.03         |
|                                                                                                                                                                                                                                                                                           | NH2            | ARG               | 170                  | OE2                                                                                           | GLU             | 1                  | 2.79         |
|                                                                                                                                                                                                                                                                                           | OH             | TYR               | 171                  | N                                                                                             | GLU             | 1                  | 2.7          |
| <b>Receptor Non-Bonded Contacts:</b> MET5, TYR7, TYR9, THR24, LYS45, TYR59, ARG62, GLU63, ILE66, SER67, ASN70, THR73, TYR74, GLU76, ASN77, THR80, TYR84, ILE95, ARG97, TYR99, ASP116, TYR123, THR143, LYS146, TRP147, VAL152, GLN155, ASP156, TYR159, LEU163, SER167, ARG170, and TYR171. |                |                   |                      | <b>Peptide Non-Bonded Contacts:</b> GLU1, GLU2, GLY4, ALA3, ALA6, PHE7, SER8, and PHE9.       |                 |                    |              |
| 5HHP                                                                                                                                                                                                                                                                                      | OH             | TYR               | 7                    | N                                                                                             | GLY             | 1                  | 2.83         |
|                                                                                                                                                                                                                                                                                           | OE1            | GLU               | 63                   | N                                                                                             | ILE             | 2                  | 3.09         |
|                                                                                                                                                                                                                                                                                           | NH1            | ARG               | 65                   | OE2                                                                                           | GLU             | 4                  | 2.53         |
|                                                                                                                                                                                                                                                                                           | NZ             | LYS               | 66                   | O                                                                                             | ILE             | 2                  | 2.87         |
|                                                                                                                                                                                                                                                                                           | OD1            | ASP               | 77                   | N                                                                                             | LEU             | 9                  | 2.93         |
|                                                                                                                                                                                                                                                                                           | OH             | TYR               | 99                   | N                                                                                             | LEU             | 3                  | 2.98         |
|                                                                                                                                                                                                                                                                                           | OG1            | THR               | 143                  | O                                                                                             | LEU             | 9                  | 2.69         |
|                                                                                                                                                                                                                                                                                           | NZ             | LYS               | 146                  | O                                                                                             | THR             | 8                  | 3.07         |
|                                                                                                                                                                                                                                                                                           | NZ             | LYS               | 146                  | OG1                                                                                           | THR             | 8                  | 3.15         |
|                                                                                                                                                                                                                                                                                           | NE1            | TRP               | 147                  | O                                                                                             | THR             | 8                  | 2.99         |
|                                                                                                                                                                                                                                                                                           | OH             | TYR               | 159                  | O                                                                                             | GLY             | 1                  | 2.62         |
|                                                                                                                                                                                                                                                                                           | OH             | TYR               | 171                  | N                                                                                             | GLY             | 1                  | 2.71         |
| <b>Receptor Non-Bonded Contacts:</b> TYR7, GLU63, ARG65, LYS66, VAL67, HIS70, THR73, ASP77, THR80, LEU81, TYR84, ARG97, TYR99, HIS114, TYR116, THR143, LYS146, TRP147, VAL152, LEU156, TYR159, TRP167, and TYR171.                                                                        |                |                   |                      | <b>Peptide Non-Bonded Contacts:</b> ILE 2, GLY1, GLU4, LEU3, VAL6, PHE7, LEU9, and THR8       |                 |                    |              |
| KQNDRCTLV                                                                                                                                                                                                                                                                                 | OE2            | GLU               | 63                   | NE2                                                                                           | GLN             | 2                  | 2.92         |
|                                                                                                                                                                                                                                                                                           | NZ             | LYS               | 66                   | O                                                                                             | ASP             | 4                  | 2.93         |
|                                                                                                                                                                                                                                                                                           | NE2            | HIS               | 70                   | OD2                                                                                           | ASP             | 4                  | 3.07         |
|                                                                                                                                                                                                                                                                                           | NH2            | ARG               | 97                   | O                                                                                             | VAL             | 9                  | 2.81         |
|                                                                                                                                                                                                                                                                                           | OH             | TYR               | 159                  | O                                                                                             | ASN             | 3                  | 2.84         |
|                                                                                                                                                                                                                                                                                           | NE1            | TRP               | 167                  | O                                                                                             | LYS             | 1                  | 2.67         |
| <b>Receptor Non-Bonded Contacts:</b> TYR59, GLU63, LYS66, HIS70, THR73, HIS74, ASP77, ARG97, HIS114, TYR116, TYR123, THR143, TRP147, LEU156, TYR159, TRP167, and ARG170.                                                                                                                  |                |                   |                      | <b>Peptide Non-Bonded Contacts:</b> LYS1, GLN2, ASP4, ASN3, LEU8, VAL9, THR7, CYS6, and ARG5. |                 |                    |              |
| FLFWFSFGY                                                                                                                                                                                                                                                                                 | OG1            | THR               | 73                   | OH                                                                                            | TYR             | 9                  | 2.79         |
|                                                                                                                                                                                                                                                                                           | OG1            | THR               | 73                   | OH                                                                                            | TYR             | 9                  | 2.79         |
|                                                                                                                                                                                                                                                                                           | OD1            | ASP               | 77                   | N                                                                                             | TYR             | 9                  | 2.86         |
|                                                                                                                                                                                                                                                                                           | NE1            | TRP               | 147                  | OG                                                                                            | SER             | 6                  | 2.95         |

|                                                                                                                                                                                                                                                              |     |     |     |                                                                                               |     |   |      |
|--------------------------------------------------------------------------------------------------------------------------------------------------------------------------------------------------------------------------------------------------------------|-----|-----|-----|-----------------------------------------------------------------------------------------------|-----|---|------|
| <b>Receptor Non-Bonded Contacts:</b> MET5, TYR7, PHE33, MET45, TYR59, GLU63, LYS66, VAL67, THR73, HIS74, ASP77, ARG97, TYR99, GLY100, TYR116, TYR123, ILE124, THR143, TRP147, VAL152, GLN155, LEU156, TYR159, CYS164, and TRP167.                            |     |     |     | <b>Peptide Non-Bonded Contacts:</b> LEU2 PHE1, PHE3, PHE7, TYR9, GLY8, TRP4, SER6, and PHE5.  |     |   |      |
| <b>YLLIVVGTI</b>                                                                                                                                                                                                                                             | OG1 | THR | 73  | OH                                                                                            | TYR | 9 | 2.79 |
|                                                                                                                                                                                                                                                              | OG1 | THR | 73  | OH                                                                                            | TYR | 9 | 2.79 |
|                                                                                                                                                                                                                                                              | OD1 | ASP | 77  | N                                                                                             | TYR | 9 | 2.86 |
|                                                                                                                                                                                                                                                              | NE1 | TRP | 147 | OG                                                                                            | SER | 6 | 2.95 |
| <b>Receptor Non-Bonded Contacts:</b> MET5, TYR7, PHE33, MET45, TYR59, GLU63, LYS66, VAL67, THR73, HIS74, ASP77, ARG97, TYR99, GLY100, TYR116, TYR123, ILE124, THR143, TRP147, VAL152, GLN155, LEU156, TYR159, CYS164, and TRP167.                            |     |     |     | <b>Peptide Non-Bonded Contacts:</b> LEU2, PHE1, PHE3, PHE7, TYR9, GLY8, TRP4, SER6, and PHE5. |     |   |      |
| <b>LLTVSLSPV</b>                                                                                                                                                                                                                                             | OE2 | GLU | 63  | N                                                                                             | LEU | 1 | 2.76 |
|                                                                                                                                                                                                                                                              | NE2 | HIS | 70  | O                                                                                             | VAL | 4 | 3.33 |
|                                                                                                                                                                                                                                                              | OG1 | THR | 80  | O                                                                                             | PRO | 8 | 2.88 |
|                                                                                                                                                                                                                                                              | OG1 | THR | 143 | OXT                                                                                           | VAL | 9 | 2.83 |
|                                                                                                                                                                                                                                                              | NE1 | TRP | 147 | OG                                                                                            | SER | 7 | 2.75 |
| <b>Receptor Non-Bonded Contacts:</b> MET5, ARG6, TYR7, GLY26, PHE33, VAL34, TYR59, GLU63, LYS66, HIS70, THR73, VAL76, ASP77, THR80, TYR84, ARG97, TYR99, GLY100, HIS114, TYR123, THR143, LYS146, TRP147, VAL152, GLN155, LEU156, TYR159, CYS164, and TYR171. |     |     |     | <b>Peptide Non-Bonded Contacts:</b> LEU2, LEU1, VAL4, THR3, LEU6, PRO8, VAL9 SER7, and SER5.  |     |   |      |
| <b>FVLGSILFI</b>                                                                                                                                                                                                                                             | NZ  | LYS | 66  | O                                                                                             | GLY | 4 | 2.85 |
|                                                                                                                                                                                                                                                              | NE2 | HIS | 70  | O                                                                                             | LEU | 3 | 3.09 |
|                                                                                                                                                                                                                                                              | NE1 | TRP | 147 | O                                                                                             | LEU | 7 | 2.8  |
| <b>Receptor Non-Bonded Contacts:</b> MET5, TYR7, LYS66, HIS70, THR73, HIS74, ASP77, THR80, TYR84, ARG97, TYR99, HIS114, THR143, LYS146, TRP147, VAL152, LEU156, TYR159, THR163, CYS164, and TRP167.                                                          |     |     |     | <b>Peptide Non-Bonded Contacts:</b> PHE1, LEU3, GLY4, PHE8, ILE9, VAL2, ILE6, and LEU7.       |     |   |      |
| <b>TEAIVCVEL</b>                                                                                                                                                                                                                                             | OE1 | GLU | 63  | N                                                                                             | THR | 1 | 2.75 |
|                                                                                                                                                                                                                                                              | OE1 | GLU | 63  | OG1                                                                                           | THR | 1 | 2.74 |
|                                                                                                                                                                                                                                                              | NE1 | TRP | 147 | O                                                                                             | GLU | 8 | 2.85 |
|                                                                                                                                                                                                                                                              | OG  | SER | 167 | O                                                                                             | GLU | 2 | 2.98 |
|                                                                                                                                                                                                                                                              | OH  | TYR | 171 | N                                                                                             | GLU | 2 | 2.69 |
|                                                                                                                                                                                                                                                              | OH  | TYR | 171 | O                                                                                             | GLU | 2 | 2.72 |
| <b>Receptor Non-Bonded Contacts:</b> TYR7, VAL34, ILE52, GLU55, TYR59, TRP60, GLU63, ILE66, ASN70, THR73, TYR74, ASN77, THR80, TYR99, THR143, LYS146, TRP147, VAL152, TYR159, LEU163, CYS164, SER167, and TYR171.                                            |     |     |     | <b>Peptide Non-Bonded Contacts:</b> ALA3, THR1, GLU2, VAL5, GLU8, LEU9, CYS6 VAL7, and ILE4.  |     |   |      |

**Table S5.** Molecular docking between selected CTL peptides and mouse MHC-I molecules

| PDB ID: 1YN6 (classical) H2-Db |               |       |      |                  |                  |                   |              |                |
|--------------------------------|---------------|-------|------|------------------|------------------|-------------------|--------------|----------------|
| Peptide                        | Docking Score | RMS D | Bond | Protein Residues | Peptide Residues | Energy (kcal/mol) | Distance (Å) | Bond-Frequency |
| KQNDRCT LV                     | -40.18        | 0.92  | IH   | Glu9             | Arg5             | -15.18            | 3.06         | 4              |
|                                |               |       | H    | Lys66            | Asn3             | -4.20             | 2.82         | 1              |
|                                |               |       | H    | Gln70            | Arg5             | -1.00             | 3.04         | 1              |
|                                |               |       | H    | Asn80            | Val9             | -3.90             | 2.94         | 1              |
|                                |               |       | IH   | Lys146           | Val9             | -32.39            | 2.76         | 4              |
|                                |               |       | H    | Trp147           | Val9             | -6.50             | 2.92         | 1              |
|                                |               |       | H    | His155           | Cys6             | -3.50             | 2.77         | 1              |
|                                |               |       | H    | Tyr156           | Leu8             | -1.10             | 3.08         | 1              |
|                                |               |       | H    | Gly162           | Lys1             | -5.30             | 2.73         | 1              |
|                                |               |       | H    | Glu163           | Asn3             | -2.70             | 2.86         | 1              |
|                                |               |       | IH   | Glu166           | Lys1             | -48.82            | 2.76         | 6              |
|                                |               |       | H    | Glu166           | Asn3             | -8.00             | 2.95         | 1              |

|                                |        |      |        |        |      |        |      |   |
|--------------------------------|--------|------|--------|--------|------|--------|------|---|
| FLFWFSFG<br>Y                  | -40.37 | 1.86 | H      | Gln65  | Phe1 | -12.50 | 3.01 | 2 |
|                                |        |      | H      | Asn80  | Tyr9 | -4.90  | 2.74 | 1 |
|                                |        |      | H      | Tyr84  | Tyr9 | -3.40  | 3.01 | 2 |
|                                |        |      | IH     | Lys146 | Tyr9 | -11.76 | 3.12 | 3 |
|                                |        |      | H      | Trp147 | Tyr9 | -7.20  | 2.82 | 1 |
|                                |        |      | H      | Ser150 | Ser6 | -1.50  | 2.84 | 1 |
|                                |        |      | H      | His155 | Phe3 | -0.80  | 2.88 | 1 |
| YLLIVVGT<br>L                  | -51.49 | 0.68 | H      | Gln70  | Val6 | -3.10  | 2.89 | 2 |
|                                |        |      | H      | Trp73  | Thr8 | -0.70  | 2.94 | 1 |
|                                |        |      | H      | Gln97  | Val6 | -3.60  | 2.93 | 1 |
|                                |        |      | IH     | Lys146 | Leu9 | -37.37 | 2.68 | 4 |
|                                |        |      | H      | Trp147 | Thr8 | -0.70  | 2.93 | 1 |
|                                |        |      | H      | His155 | Val5 | -6.50  | 2.80 | 1 |
|                                |        |      | IH     | Glu163 | Tyr1 | -16.56 | 2.74 | 2 |
| IH                             | Glu166 | Tyr1 | -32.24 | 2.76   | 4    |        |      |   |
| LLTVSLSP<br>V                  | -36.38 | 1.75 | H      | Gln65  | Thr3 | -2.60  | 2.92 | 2 |
|                                |        |      | H      | Trp73  | Ser7 | -0.80  | 2.80 | 1 |
|                                |        |      | H      | Asn80  | Val9 | -2.60  | 2.94 | 1 |
|                                |        |      | H      | Tyr84  | Val9 | -4.30  | 2.56 | 1 |
|                                |        |      | IH     | Lys146 | Val9 | -21.52 | 2.84 | 3 |
|                                |        |      | H      | Trp147 | Pro8 | -0.90  | 2.79 | 1 |
|                                |        |      | H      | His155 | Leu6 | -5.80  | 2.86 | 1 |
| FVLGSILFI                      | -35.10 | 1.92 | H      | Gly69  | Leu3 | -0.60  | 3.41 | 1 |
|                                |        |      | H      | Asn80  | Ile9 | -3.80  | 2.79 | 1 |
|                                |        |      | H      | Tyr84  | Ile9 | -4.20  | 2.67 | 1 |
|                                |        |      | IH     | Lys146 | Ile9 | -21.00 | 2.99 | 3 |
|                                |        |      | H      | His155 | Phe1 | -6.70  | 3.09 | 1 |
|                                |        |      | H      | Ala158 | Phe1 | -3.60  | 2.78 | 1 |
| TEAIVCVE<br>L                  | -39.72 | 2.56 | H      | Gln65  | Thr1 | -2.50  | 2.61 | 1 |
|                                |        |      | H      | Trp73  | Val7 | -1.90  | 2.89 | 1 |
|                                |        |      | H      | Ser77  | Leu9 | -1.10  | 3.28 | 1 |
|                                |        |      | H      | Asn80  | Glu8 | -5.90  | 2.78 | 1 |
|                                |        |      | H      | Asn80  | Leu9 | -6.80  | 2.77 | 1 |
|                                |        |      | H      | Tyr84  | Leu9 | -5.20  | 2.65 | 1 |
|                                |        |      | H      | Thr143 | Leu9 | -2.50  | 2.60 | 1 |
|                                |        |      | IH     | Lys146 | Glu8 | -26.83 | 2.86 | 4 |
|                                |        |      | IH     | Lys146 | Leu9 | -11.47 | 3.15 | 3 |
|                                |        |      | H      | Trp147 | Glu8 | -1.90  | 2.83 | 1 |
|                                |        |      | H      | His155 | Val5 | -4.90  | 2.83 | 1 |
| H                              | Tyr156 | Val7 | -0.60  | 2.85   | 1    |        |      |   |
| PDB ID: 6JQ3 (classical) H2-Kb |        |      |        |        |      |        |      |   |
| TEAIVCVE<br>L                  | -41.53 | 1.48 | H      | Glu24  | Gln2 | -3.80  | 2.90 | 1 |
|                                |        |      | IH     | Arg62  | Asp4 | -15.23 | 3.07 | 4 |
|                                |        |      | H      | Lys66  | Gln2 | -8.10  | 2.78 | 1 |
|                                |        |      | H      | Gly69  | Lys1 | -8.40  | 2.83 | 1 |
|                                |        |      | H      | Gln72  | Lys1 | -6.50  | 2.70 | 1 |
|                                |        |      | IH     | Glu152 | Lys1 | -28.28 | 2.71 | 4 |
|                                |        |      | H      | Thr163 | Asp4 | -1.70  | 2.69 | 1 |
|                                |        |      | IH     | Glu166 | Arg5 | -35.72 | 2.82 | 6 |
|                                |        |      | H      | Glu166 | Thr7 | -3.60  | 2.66 | 1 |
|                                |        |      | H      | Trp167 | Asp4 | -5.30  | 2.80 | 1 |
|                                |        |      | H      | Arg169 | Leu8 | -6.90  | 2.82 | 1 |
|                                |        |      | IH     | Lys173 | Val9 | -41.75 | 2.67 | 4 |
| TEAIVCVE<br>L                  | -44.40 | 1.78 | H      | Tyr7   | Tyr9 | -4.80  | 2.61 | 1 |
|                                |        |      | H      | Arg62  | Phe7 | -4.40  | 2.77 | 1 |
|                                |        |      | IH     | Lys66  | Tyr9 | -24.63 | 2.70 | 2 |



|           |        |      |                                    |        |      |        |       |      |        |      |   |
|-----------|--------|------|------------------------------------|--------|------|--------|-------|------|--------|------|---|
|           |        |      | H                                  | Asn70  | Tyr9 | -3.20  | 2.71  | 1    |        |      |   |
|           |        |      | H                                  | Lys146 | Phe1 | -8.20  | 2.86  | 1    |        |      |   |
|           |        |      | H                                  | Gln149 | Phe1 | -9.80  | 2.80  | 2    |        |      |   |
|           |        |      | H                                  | Arg155 | Phe3 | -0.80  | 3.05  | 1    |        |      |   |
|           |        |      | H                                  | Tyr159 | Tyr9 | -1.70  | 2.61  | 1    |        |      |   |
| TEAIVCVEL | -39.64 | 1.15 | H                                  | Arg62  | Val6 | -4.20  | 2.79  | 1    |        |      |   |
|           |        |      | H                                  | Lys66  | Ile4 | -11.40 | 2.79  | 1    |        |      |   |
|           |        |      | H                                  | Ser73  | Tyr1 | -2.40  | 2.81  | 1    |        |      |   |
|           |        |      | IH                                 | Asp77  | Tyr1 | -26.87 | 2.77  | 3    |        |      |   |
|           |        |      | H                                  | Tyr116 | Tyr1 | -3.10  | 2.66  | 1    |        |      |   |
|           |        |      | H                                  | Arg155 | Leu2 | -2.40  | 2.85  | 1    |        |      |   |
|           |        |      | H                                  | Arg155 | Leu3 | -2.70  | 2.76  | 1    |        |      |   |
|           |        |      | H                                  | Glu166 | Thr8 | -1.40  | 2.69  | 1    |        |      |   |
|           |        |      | H                                  | Trp167 | Gly7 | -2.50  | 2.91  | 1    |        |      |   |
|           |        |      | IH                                 | Arg169 | Leu9 | -28.73 | 3.04  | 6    |        |      |   |
|           |        |      | H                                  | Arg170 | Leu9 | -0.70  | 3.40  | 1    |        |      |   |
|           |        |      | H                                  | Glu24  | Thr3 | -1.30  | 2.71  | 1    |        |      |   |
|           |        |      | H                                  | Arg62  | Leu6 | -1.30  | 2.84  | 1    |        |      |   |
|           |        |      | H                                  | Arg62  | Ser7 | -8.30  | 2.84  | 2    |        |      |   |
|           |        |      | H                                  | Lys66  | Val4 | -12.20 | 2.76  | 1    |        |      |   |
|           |        |      | IH                                 | Asp77  | Leu1 | -26.31 | 2.84  | 4    |        |      |   |
|           |        |      | H                                  | Ser99  | Thr3 | -1.60  | 2.93  | 1    |        |      |   |
|           |        |      | H                                  | Tyr116 | Leu1 | -3.30  | 2.71  | 1    |        |      |   |
|           |        |      | H                                  | Tyr159 | Ser5 | -2.20  | 2.76  | 1    |        |      |   |
|           |        |      | H                                  | Trp167 | Leu6 | -1.70  | 2.73  | 1    |        |      |   |
|           |        |      | H                                  | Tyr7   | Ile9 | -4.70  | 2.61  | 1    |        |      |   |
|           |        |      | I                                  | Arg62  | Ile9 | -2.58  | 3.34  | 1    |        |      |   |
|           |        |      | IH                                 | Lys66  | Ile9 | -15.16 | 2.81  | 2    |        |      |   |
|           |        |      | H                                  | Ser73  | Phe1 | -4.50  | 2.95  | 1    |        |      |   |
|           |        |      | IH                                 | Asp77  | Phe1 | -18.98 | 2.81  | 3    |        |      |   |
|           |        |      | H                                  | Arg155 | Leu3 | -9.50  | 2.88  | 2    |        |      |   |
|           |        |      | H                                  | Arg155 | Ile6 | -5.30  | 2.78  | 1    |        |      |   |
|           |        |      | H                                  | Tyr159 | Ile9 | -1.60  | 2.63  | 1    |        |      |   |
|           |        |      | IH                                 | Arg62  | Leu9 | -32.02 | 2.97  | 7    |        |      |   |
|           |        |      | IH                                 | Lys66  | Leu9 | -14.94 | 2.69  | 2    |        |      |   |
|           |        |      | H                                  | Asn70  | Val7 | -3.90  | 2.87  | 1    |        |      |   |
|           |        |      | H                                  | Tyr116 | Cys6 | -2.30  | 3.30  | 1    |        |      |   |
|           |        |      | H                                  | His145 | Thr1 | -1.70  | 2.89  | 1    |        |      |   |
|           |        |      | H                                  | Lys146 | Glu2 | -0.60  | 3.26  | 1    |        |      |   |
|           |        |      | H                                  | Lys146 | Ala3 | -3.50  | 2.86  | 1    |        |      |   |
|           |        |      | H                                  | Gln149 | Thr1 | -16.20 | 2.83  | 2    |        |      |   |
|           |        |      | H                                  | Glu152 | Cys6 | -8.70  | 3.03  | 2    |        |      |   |
|           |        |      | IH                                 | Arg155 | Glu8 | -35.32 | 3.00  | 6    |        |      |   |
|           |        |      | H                                  | Trp167 | Leu9 | -2.70  | 2.80  | 1    |        |      |   |
|           |        |      | PDB ID: 7LFK (non-classical) H2-M3 |        |      |        |       |      |        |      |   |
|           |        |      |                                    |        |      | IH     | Glu62 | Lys1 | -29.07 | 2.77 | 4 |
|           |        |      |                                    |        |      | H      | Glu62 | Gln2 | -7.40  | 2.79 | 1 |
| H         | Asn77  | Val9 |                                    |        |      | -5.80  | 2.95  | 2    |        |      |   |
| H         | Thr143 | Val9 |                                    |        |      | -2.30  | 2.60  | 1    |        |      |   |
| H         | Ala150 | Arg5 |                                    |        |      | -4.60  | 2.79  | 1    |        |      |   |
| H         | Ala158 | Asn3 |                                    |        |      | -4.70  | 3.05  | 2    |        |      |   |
| H         | Gly162 | Lys1 |                                    |        |      | -10.80 | 2.79  | 1    |        |      |   |
| IH        | Glu166 | Lys1 |                                    |        |      | -16.49 | 2.62  | 2    |        |      |   |
|           |        |      | H                                  | Ser73  | Ser6 | -1.50  | 2.85  | 1    |        |      |   |
|           |        |      | H                                  | Asn77  | Phe7 | -1.90  | 2.85  | 1    |        |      |   |
|           |        |      | H                                  | Tyr155 | Trp4 | -2.30  | 2.96  | 1    |        |      |   |

|           |        |      |    |        |      |        |      |   |
|-----------|--------|------|----|--------|------|--------|------|---|
|           |        |      | H  | Ala158 | Phe1 | -10.20 | 2.91 | 1 |
|           |        |      | IH | Glu161 | Phe1 | -28.70 | 2.81 | 3 |
| TEAIVCVEL | -48.01 | 1.01 | H  | Ala76  | Leu9 | -0.50  | 3.54 | 1 |
|           |        |      | H  | Asn77  | Gly7 | -0.50  | 2.99 | 1 |
|           |        |      | IH | Arg79  | Leu9 | -27.06 | 3.09 | 6 |
|           |        |      | H  | Thr80  | Thr8 | -1.50  | 2.95 | 1 |
|           |        |      | H  | Arg146 | Val6 | -7.10  | 2.76 | 1 |
|           |        |      | H  | Arg146 | Thr8 | -5.80  | 2.94 | 2 |
|           |        |      | H  | Ala158 | Tyr1 | -0.50  | 2.86 | 1 |
|           |        |      | A  | Glu163 | Tyr1 | -0.50  | 3.43 | 1 |
|           |        |      | H  | Glu166 | Tyr1 | -5.20  | 2.62 | 1 |
| TEAIVCVEL | -36.17 | 1.02 | H  | Asn77  | Ser5 | -2.00  | 2.72 | 1 |
|           |        |      | H  | Asn77  | Ser7 | -2.30  | 2.86 | 1 |
|           |        |      | H  | Thr80  | Val9 | -2.10  | 2.71 | 1 |
|           |        |      | H  | Arg146 | Ser7 | -4.10  | 2.74 | 1 |
|           |        |      | IH | Arg146 | Val9 | -24.39 | 2.97 | 5 |
|           |        |      | H  | Ala158 | Leu1 | -3.50  | 2.68 | 1 |
| TEAIVCVEL | -43.89 | 0.70 | IH | Glu163 | Leu1 | -18.17 | 2.58 | 2 |
|           |        |      | H  | Lys66  | Leu3 | -9.00  | 2.80 | 1 |
|           |        |      | H  | Asn77  | Ile9 | -4.80  | 2.75 | 1 |
|           |        |      | H  | Tyr114 | Ile9 | -4.20  | 2.61 | 1 |
|           |        |      | H  | Gly162 | Phe1 | -2.90  | 3.00 | 1 |
| TEAIVCVEL | -31.13 | 1.73 | IH | Glu166 | Phe1 | -24.68 | 2.65 | 2 |
|           |        |      | H  | Asn77  | Leu9 | -6.60  | 2.83 | 1 |
|           |        |      | H  | Thr80  | Leu9 | -0.60  | 2.55 | 1 |
|           |        |      | H  | Thr143 | Glu8 | -1.00  | 2.65 | 1 |
|           |        |      | H  | Arg146 | Val7 | -4.50  | 2.81 | 1 |
|           |        |      | IH | Arg146 | Leu9 | -24.79 | 2.75 | 4 |
|           |        |      | H  | Thr152 | Cys6 | -1.70  | 3.20 | 1 |
|           |        |      | H  | Glu161 | Thr1 | -2.20  | 2.62 | 1 |

**Table S6.** Atom-atom interactions across TLR2– designed vaccine construct interface obtained using PDBsum server

| S. No | TLR2 Atoms | TLR2 Residues | TLR2 residues No | Vaccine Atoms | Vaccine Resides | Vaccine residue No | Distance (Å)-bond type (H=H-bond) |
|-------|------------|---------------|------------------|---------------|-----------------|--------------------|-----------------------------------|
| 1     | OE1        | GLN           | 79               | N             | ARG             | 246                | 3.05-H                            |
| 2     | OG1        | THR           | 127              | OG1           | THR             | 167                | 3.03-H                            |
| 3     | NZ         | LYS           | 150              | OE2           | GLU             | 58                 | 2.73-H                            |
| 4     | NE2        | GLN           | 152              | OE1           | GLU             | 131                | 3.11-H                            |
| 5     | OD1        | ASN           | 248              | OG1           | THR             | 126                | 3.14-H                            |
| 6     | ND2        | ASN           | 248              | O             | ALA             | 125                | 2.88-H                            |
| 7     | NZ         | LYS           | 252              | O             | GLU             | 68                 | 2.81-H                            |
| 8     | NZ         | LYS           | 308              | O             | ALA             | 70                 | 2.94-H                            |
| 9     | O          | LYS           | 551              | NZ            | LYS             | 318                | 2.78-H                            |
| 10    | OG         | SER           | 553              | N             | VAL             | 321                | 3.06-H                            |
| 11    | OG         | SER           | 553              | O             | VAL             | 321                | 3.2-H                             |
| 12    | O          | GLN           | 554              | OG1           | THR             | 294                | 2.95-H                            |
| 13    | OE1        | GLN           | 554              | N             | TRP             | 319                | 3.02-H                            |
| 14    | NE2        | GLN           | 554              | O             | CYS             | 296                | 2.84-H                            |
| 15    | NE2        | GLN           | 557              | O             | VAL             | 292                | 2.81-H                            |
| 16    | NH1        | ARG           | 570              | O             | TYR             | 323                | 2.97-H                            |
| 17    | NH2        | ARG           | 570              | O             | TYR             | 323                | 2.82-H                            |
| 18    | NH2        | ARG           | 570              | O             | ILE             | 324                | 3.18-H                            |

|                                                                                                                                                                                                                                       |    |     |     |                                                                                                                                                                                                                                             |     |    |                  |
|---------------------------------------------------------------------------------------------------------------------------------------------------------------------------------------------------------------------------------------|----|-----|-----|---------------------------------------------------------------------------------------------------------------------------------------------------------------------------------------------------------------------------------------------|-----|----|------------------|
| 19                                                                                                                                                                                                                                    | NZ | LYS | 150 | OE1                                                                                                                                                                                                                                         | GLU | 58 | 2.73-salt bridge |
| 20                                                                                                                                                                                                                                    | NZ | LYS | 252 | OE2                                                                                                                                                                                                                                         | GLU | 68 | 3.97-salt bridge |
| <b>TLR2 Non-Bonded Contacts:</b> ARG32, ASN33, ILE35, SER56, GLN79, ALA80, GLU103, HIS104, SER125, THR127, PHE128, LYS150, GLN152, ASN248, LEU250, LYS252, LYS308, LYS527, LYS551, SER553, GLN554, GLN557, GLY558, SER559, and ARG570 |    |     |     | <b>Vaccine Non-Bonded Contacts:</b> HIS220, CYS245, MET247, ARG246, SER169, THR167, SER248, GLY249, PRO250, GLU58, GLU131, THR126, ALA125, GLU68, ALA70, GLY293, LYS318, VAL321, THR294, TRP319, CYS296, THR297, VAL292, TYR323, and ILE324 |     |    |                  |

**Table S7.** Atom-atom interactions across TLR3– designed vaccine construct interface obtained using PDBsum server

| S. No | TLR3 Atoms | TLR3 Residues | TLR3 residues No | Vaccine Atoms | Vaccine Resides | Vaccine residue No | Distance (Å)     |
|-------|------------|---------------|------------------|---------------|-----------------|--------------------|------------------|
| 1     | NZ         | LYS           | 27               | OE2           | GLU             | 33                 | 2.7-H            |
| 2     | NE2        | HIS           | 32               | O             | ALA             | 38                 | 2.89-H           |
| 3     | OG1        | THR           | 78               | O             | GLY             | 310                | 2.72-H           |
| 4     | OD2        | ASP           | 81               | OG            | SER             | 152                | 2.65-H           |
| 5     | NZ         | LYS           | 102              | O             | PRO             | 311                | 2.75-H           |
| 6     | NZ         | LYS           | 102              | O             | GLY             | 312                | 2.75-H           |
| 7     | ND2        | ASN           | 105              | O             | GLY             | 151                | 3.05-H           |
| 8     | OE1        | GLN           | 107              | NZ            | LYS             | 153                | 2.92-H           |
| 9     | NE2        | GLN           | 107              | O             | GLY             | 151                | 2.77-H           |
| 10    | OE1        | GLU           | 175              | NZ            | LYS             | 145                | 2.66-H           |
| 11    | NZ         | LYS           | 200              | O             | GLY             | 199                | 2.74-H           |
| 12    | OD1        | ASN           | 230              | NZ            | LYS             | 94                 | 2.87-H           |
| 13    | NH1        | ARG           | 251              | OD2           | ASP             | 202                | 2.77-H           |
| 14    | NH2        | ARG           | 251              | OD2           | ASP             | 202                | 2.73-H           |
| 15    | ND2        | ASN           | 252              | OG            | SER             | 201                | 2.9-H            |
| 16    | OH         | TYR           | 283              | O             | ASP             | 98                 | 2.78-H           |
| 17    | OH         | TYR           | 307              | N             | ALA             | 70                 | 2.97-H           |
| 18    | OH         | TYR           | 326              | OE1           | GLN             | 209                | 2.8-H            |
| 19    | NZ         | LYS           | 330              | O             | GLU             | 68                 | 2.69-H           |
| 20    | NZ         | LYS           | 330              | OE1           | GLU             | 68                 | 2.73-H           |
| 21    | NH1        | ARG           | 331              | O             | ALA             | 70                 | 2.75-H           |
| 22    | NH1        | ARG           | 331              | O             | GLY             | 124                | 2.75-H           |
| 23    | NH2        | ARG           | 331              | O             | GLY             | 124                | 2.99-H           |
| 24    | NE2        | HIS           | 359              | NH1           | ARG             | 212                | 3.09-H           |
| 25    | NZ         | LYS           | 416              | OE1           | GLU             | 68                 | 2.86-H           |
| 26    | NZ         | LYS           | 416              | OE2           | GLU             | 68                 | 2.69-H           |
| 27    | OE1        | GLU           | 434              | OG1           | THR             | 213                | 2.76-H           |
| 28    | OE2        | GLU           | 434              | N             | GLY             | 251                | 2.81-H           |
| 29    | OE1        | GLU           | 533              | OG            | SER             | 169                | 2.58-H           |
| 30    | ND1        | HIS           | 565              | OG            | SER             | 169                | 3-H              |
| 31    | NZ         | LYS           | 589              | O             | SER             | 169                | 2.89-H           |
| 32    | NZ         | LYS           | 589              | O             | LEU             | 170                | 2.83-H           |
| 33    | NZ         | LYS           | 589              | OG            | SER             | 171                | 2.88-H           |
| 34    | O          | SER           | 611              | OG            | SER             | 171                | 2.71-H           |
| 35    | NZ         | LYS           | 613              | O             | SER             | 171                | 2.96-H           |
| 36    | OG1        | THR           | 638              | O             | PHE             | 13                 | 2.84-H           |
| 37    | NZ         | LYS           | 27               | OE1           | GLU             | 33                 | 2.7--salt bridge |
| 38    | NZ         | LYS           | 102              | OD1           | ASP             | 313                | 2.76-salt bridge |
| 39    | NE2        | HIS           | 156              | OE2           | GLU             | 92                 | 2.88-salt bridge |

|                                                                                                                                                                                                                                                                                                                                                                                                                                                 |     |     |     |                                                                                                                                                                                                                                                                                                                                                                                                                                                   |     |     |                  |
|-------------------------------------------------------------------------------------------------------------------------------------------------------------------------------------------------------------------------------------------------------------------------------------------------------------------------------------------------------------------------------------------------------------------------------------------------|-----|-----|-----|---------------------------------------------------------------------------------------------------------------------------------------------------------------------------------------------------------------------------------------------------------------------------------------------------------------------------------------------------------------------------------------------------------------------------------------------------|-----|-----|------------------|
| 40                                                                                                                                                                                                                                                                                                                                                                                                                                              | OE1 | GLU | 175 | NZ                                                                                                                                                                                                                                                                                                                                                                                                                                                | LYS | 145 | 2.66-salt bridge |
| 41                                                                                                                                                                                                                                                                                                                                                                                                                                              | NH2 | ARG | 251 | OD1                                                                                                                                                                                                                                                                                                                                                                                                                                               | ASP | 202 | 2.73-salt bridge |
| 42                                                                                                                                                                                                                                                                                                                                                                                                                                              | NZ  | LYS | 330 | OE2                                                                                                                                                                                                                                                                                                                                                                                                                                               | GLU | 68  | 2.73-salt bridge |
| 43                                                                                                                                                                                                                                                                                                                                                                                                                                              | NH1 | ARG | 331 | OD1                                                                                                                                                                                                                                                                                                                                                                                                                                               | ASP | 72  | 3.84-salt bridge |
| 44                                                                                                                                                                                                                                                                                                                                                                                                                                              | NZ  | LYS | 416 | OE1                                                                                                                                                                                                                                                                                                                                                                                                                                               | GLU | 68  | 2.69-salt bridge |
| 45                                                                                                                                                                                                                                                                                                                                                                                                                                              | NE2 | HIS | 665 | OE1                                                                                                                                                                                                                                                                                                                                                                                                                                               | GLU | 15  | 2.7-salt bridge  |
| <b>TLR3 Non-Bonded Contacts:</b> LYS27, VAL30, SER31, HIS32, VAL34, THR54, VAL55, ASN57, THR59, THR78, SER79, ASP81, LYS102, ASN105, GLN107, GLU127, HIS156, GLN174, GLU175, ASN180, LYS200, ASN230, ARG251, ASN252, TYR283, TYR302, TYR307, TYR326, LYS330, ARG331, GLU358, HIS359, TYR383, ILE411, LYS416, GLU434, PHE459, GLN483, GLU533, HIS565, ILE566, GLU587, LYS589, ILE590, SER611, LYS613, LEU637, THR638, HIS665, THR666, and ASN667 |     |     |     | <b>Vaccine Non-Bonded Contacts:</b> GLU33, VAL34, THR35, ALA38, PRO309, VAL42, GLY310, PRO311, SER152, ALA148, GLY151, GLY312, ASP313, LYS153, ALA147, LYS91, GLU92, GLY199, GLY198, LYS145, LEU197, LYS94, ASP95, ASP202, SER201, LYS74, ASP98, ALA70, ALA100, SER206, ALA69, GLN209, GLU68, ASP72, GLY124, GLY71, LEU210, ARG212, THR213, GLY251, GLY249, PRO250, SER248, MET247, SER169, GLU58, SER171, LEU170, LYS14, PHE13, ASP11, and GLU15 |     |     |                  |

**Table S8.** Atom-atom interactions across TLR4–designed vaccine construct interface obtained using PDBsum server

| S. No | TLR4 Atoms | TLR4 Residues | TLR4 residues No | Vaccine Atoms | Vaccine Resides | Vaccine residue No | Distance (Å) |
|-------|------------|---------------|------------------|---------------|-----------------|--------------------|--------------|
| 1     | O          | VAL           | 32               | OG1           | THR             | 126                | 2.9-H        |
| 2     | OE1        | GLU           | 42               | NE            | ARG             | 212                | 2.77-H       |
| 3     | OD2        | ASP           | 84               | NE2           | GLN             | 209                | 2.83-H       |
| 4     | NE         | ARG           | 87               | O             | LEU             | 210                | 2.73-H       |
| 5     | O          | HIS           | 159              | SG            | CYS             | 289                | 3.29-H       |
| 6     | NH1        | ARG           | 234              | O             | GLY             | 199                | 2.79-H       |
| 7     | NH1        | ARG           | 234              | OD2           | ASP             | 202                | 2.72-H       |
| 8     | NH2        | ARG           | 234              | O             | GLY             | 199                | 2.96-H       |
| 9     | NH2        | ARG           | 264              | O             | VAL             | 193                | 2.89-H       |
| 10    | O          | ASN           | 265              | N             | GLY             | 295                | 3.01-H       |
| 11    | ND2        | ASN           | 265              | OD2           | ASP             | 203                | 2.84-H       |
| 12    | OE1        | GLU           | 266              | N             | THR             | 294                | 2.78-H       |
| 13    | OE1        | GLU           | 270              | NZ            | LYS             | 318                | 2.65-H       |
| 14    | NH1        | ARG           | 289              | O             | GLY             | 198                | 2.79-H       |
| 15    | OH         | TYR           | 296              | O             | TYR             | 314                | 2.69-H       |
| 16    | OG         | SER           | 317              | OE1           | GLU             | 196                | 2.5-H        |
| 17    | OG1        | THR           | 319              | O             | ASP             | 313                | 2.91-H       |
| 18    | NE         | ARG           | 322              | OD2           | ASP             | 313                | 2.8-H        |
| 19    | NH2        | ARG           | 322              | OD2           | ASP             | 313                | 2.74-H       |
| 20    | NZ         | LYS           | 341              | O             | PRO             | 311                | 2.78-H       |
| 21    | NZ         | LYS           | 341              | O             | GLY             | 312                | 2.85-H       |
| 22    | OD2        | ASP           | 502              | N             | LEU             | 90                 | 3-H          |
| 23    | NE2        | GLN           | 505              | O             | SER             | 86                 | 2.8-H        |
| 24    | ND2        | ASN           | 526              | O             | GLY             | 87                 | 2.84-H       |
| 25    | O          | LEU           | 549              | NZ            | LYS             | 79                 | 2.91-H       |
| 26    | ND2        | ASN           | 575              | OE1           | GLU             | 83                 | 2.69-H       |
| 27    | NE2        | GLN           | 578              | OE2           | GLU             | 115                | 2.81-H       |
| 28    | OE2        | GLU           | 603              | NZ            | LYS             | 119                | 2.69-H       |
| 29    | OE2        | GLU           | 605              | NZ            | LYS             | 119                | 2.7-H        |
| 30    | NE         | ARG           | 606              | OE2           | GLU             | 115                | 2.81-H       |
| 31    | NH1        | ARG           | 606              | O             | GLU             | 83                 | 3.11-H       |
| 32    | NH2        | ARG           | 606              | O             | GLU             | 83                 | 2.84-H       |

|                                                                                                                                                                                                                                                                                                                                                                                                                                                                                              |     |     |     |                                                                                                                                                                                                                                                                                                                                                                                                       |     |     |                  |
|----------------------------------------------------------------------------------------------------------------------------------------------------------------------------------------------------------------------------------------------------------------------------------------------------------------------------------------------------------------------------------------------------------------------------------------------------------------------------------------------|-----|-----|-----|-------------------------------------------------------------------------------------------------------------------------------------------------------------------------------------------------------------------------------------------------------------------------------------------------------------------------------------------------------------------------------------------------------|-----|-----|------------------|
| 33                                                                                                                                                                                                                                                                                                                                                                                                                                                                                           | OE2 | GLU | 42  | NH1                                                                                                                                                                                                                                                                                                                                                                                                   | ARG | 212 | 2.75-salt bridge |
| 34                                                                                                                                                                                                                                                                                                                                                                                                                                                                                           | NH1 | ARG | 234 | OD1                                                                                                                                                                                                                                                                                                                                                                                                   | ASP | 202 | 2.72-salt bridge |
| 35                                                                                                                                                                                                                                                                                                                                                                                                                                                                                           | OE1 | GLU | 270 | NZ                                                                                                                                                                                                                                                                                                                                                                                                    | LYS | 318 | 2.65-salt bridge |
| 36                                                                                                                                                                                                                                                                                                                                                                                                                                                                                           | NH2 | ARG | 322 | OD2                                                                                                                                                                                                                                                                                                                                                                                                   | ASP | 313 | 2.74-salt bridge |
| 37                                                                                                                                                                                                                                                                                                                                                                                                                                                                                           | OE2 | GLU | 603 | NZ                                                                                                                                                                                                                                                                                                                                                                                                    | LYS | 119 | 2.69-salt bridge |
| 38                                                                                                                                                                                                                                                                                                                                                                                                                                                                                           | OE1 | GLU | 605 | NZ                                                                                                                                                                                                                                                                                                                                                                                                    | LYS | 119 | 2.7-salt bridge  |
| 39                                                                                                                                                                                                                                                                                                                                                                                                                                                                                           | NE  | ARG | 606 | OE1                                                                                                                                                                                                                                                                                                                                                                                                   | GLU | 115 | 2.81-salt bridge |
| <b>TLR4 Non-Bonded Contacts:</b> VAL32, MET41, GLU42, PHE63, ASP84, SER86, ARG87, THR110, GLU135, HIS159, LEU161, LYS186, LEU212, ARG234, PHE263, ARG264, ASN265, GLU266, GLY267, GLU270, ARG289, TYR292, ASP294, TYR296, VAL316, SER317, THR319, GLU321, ARG322, ASN339, LYS341, SER360, LYS362, ASN383, PHE408, LYS477, PHE500, ASP502, SER504, GLN505, ASN526, SER528, HIS529, VAL548, LEU549, ASP550, SER552, LEU553, PHE573, ASN575, THR577, GLN578, VAL602, GLU603, GLU605, and ARG606 |     |     |     | <b>Vaccine Non-Bonded Contacts:</b> THR126, ARG212, THR213, GLN209, LEU210, PHE257, CYS289, ARG207, ASP202, GLY199, ASP203, TYR263, LEU306, VAL193, GLY295, TRP142, GLY293, THR294, VAL321, PHE316, LYS318, GLY198, TYR314, ASP313, GLU196, GLY312, LYS145, ALA147, VAL195, PRO311, ALA148, GLY151, SER152, LYS153, LEU90, GLY89, GLY87, SER86, LYS79, GLU83, ARG82, ILE84, GLU115, VAL80, and LYS119 |     |     |                  |

**Table S9.** Fraction of hydrogen bonds at the designed vaccine construct–TLRs interface during the 100ns simulation timescale (with occupancy  $\geq 2\%$ )

| Modeled Vaccine-TLR2 complex                      |               |       |      |
|---------------------------------------------------|---------------|-------|------|
| TLR2 residue@atom: Vaccine construct residue@atom | No. of frames | Frac. | Avg  |
| GLU77@OE2: VAL168@N                               | 5970          | 54.3  | 2.88 |
| ARG544@NH2: GLU322@O                              | 2586          | 23.5  | 2.87 |
| LYS124@NZ: ALA57@OE1                              | 2391          | 21.7  | 2.81 |
| LYS282@NZ: ALA69@O                                | 1273          | 11.6  | 2.82 |
| GLN531@NE2: GLY293@OG1                            | 802           | 7.29  | 2.89 |
| GLN528@O: GLY293@OG1                              | 756           | 6.87  | 2.86 |
| GLU77@OE2: VAL168@OG                              | 747           | 6.79  | 2.69 |
| LYS525@O: VAL317@NZ                               | 587           | 5.34  | 2.81 |
| GLN528@NE2: GLY295@O                              | 355           | 3.23  | 2.87 |
| SER533@OG: GLU322@O                               | 227           | 2.06  | 2.91 |
| Modeled Vaccine-TLR3 complex                      |               |       |      |
| TLR3 residue@atom: Vaccine construct residue@atom | No. of frames | Frac. | Avg  |
| ASN36@ND2: GLY151@OG                              | 4159          | 37.8  | 2.88 |
| LYS81@NZ: GLY310@O                                | 2711          | 24.6  | 2.83 |
| GLU512@OE1: VAL168@OG                             | 2425          | 22    | 2.71 |
| PRO230@NH2: SER201@OD1                            | 2238          | 20.3  | 2.83 |
| LYS81@NZ:PRO311@O                                 | 2132          | 19.4  | 2.83 |
| LYS81@NZ: GLY312@OD1                              | 1409          | 12.8  | 2.8  |
| LYS309@NZ: LEU67@O                                | 1342          | 12.2  | 2.82 |
| HIS544@ND1: VAL168@OG                             | 1218          | 11.1  | 2.85 |
| ASP60@OD2: GLY151@OG                              | 1134          | 10.3  | 2.68 |
| GLU154@OE1: LEU144@NZ                             | 1108          | 10.1  | 2.79 |
| TYR262@OH: VAL97@O                                | 844           | 7.67  | 2.78 |
| HIS644@NE2: LYS14@OE1                             | 783           | 7.12  | 2.79 |
| ARG310@NH1: ALA123@O                              | 754           | 6.85  | 2.83 |
| GLU154@OE2: LEU144@NZ                             | 539           | 4.9   | 2.84 |
| LYS6@NZ: PHE32@OE1                                | 408           | 3.71  | 2.8  |
| GLU413@OE2:PRO250@N                               | 289           | 2.63  | 2.86 |
| Modeled Vaccine-TLR4 complex                      |               |       |      |
| TLR4 residue@atom: Vaccine construct residue@atom | No. of frames | Frac. | Avg  |
| ASN313@ND2: CYS194@O                              | 7296          | 66.3  | 2.85 |
| ASN549@ND2: ARG82@OE2                             | 4825          | 43.9  | 2.82 |
| GLU16@OE2: LEU211@NH1(63%)                        | 4595          | 41.8  | 2.81 |
| SER291@OG: VAL195@OE2                             | 3175          | 28.9  | 2.71 |
| ARG296@NH2: GLY312@OD2(47%)                       | 2800          | 25.5  | 2.82 |
| ARG296@NE: GLY312@OD2                             | 2494          | 22.7  | 2.81 |
| GLU16@OE1: LEU211@NE                              | 2379          | 21.6  | 2.84 |
| LYS315@NZ: LEU311@O                               | 1984          | 18    | 2.83 |
| GLU244@OE1: VAL317@NZ                             | 1874          | 17    | 2.81 |
| GLU577@OE2: ALA118@NZ                             | 1519          | 13.8  | 2.79 |
| ARG580@NH2: ARG82@O                               | 1438          | 13.1  | 2.85 |
| GLU240@OE2: GLY293@N                              | 1192          | 10.8  | 2.86 |
| TYR270@OH:ASP313@O                                | 937           | 8.52  | 2.7  |
| ARG208@NH1: GLY198@O                              | 691           | 6.28  | 2.82 |
| LYS315@NZ: GLY310@O                               | 559           | 5.08  | 2.83 |
| LEU523@O: ILE78@NZ                                | 432           | 3.93  | 2.88 |
| ARG208@NH1: SER201@OD1                            | 241           | 2.19  | 2.8  |
