# Supplementary material for: An Immunoinformatics Approach to Design a Potent Multi-Epitope Vaccine against Asia-1 Genotype of Crimean–Congo Haemorrhagic Fever Virus Using the Structural Glycoproteins as a Target
Source: MDPI journal article supplement (doi:10.3390/vaccines11010061), 2022-12-27
Supplement: s1 [file s1]

# Supporting Information 2

## An Immunoinformatics Approach to Design a Potent Multi-Epitope Vaccine Against Asia-1 Genotype of Crimean-Congo Haemorrhagic Fever Virus Using the Structural Glycoproteins as a Target

Syed Zawar Shah<sup>1†</sup>, Basit Jabbar<sup>1</sup>, Muhammad Usman Mirza<sup>2</sup>, Muhammad Waqas<sup>3,4†</sup>, Shahkaar Aziz<sup>5</sup>, Sobia Ahsan Halim<sup>4</sup>, Amjad Ali<sup>3\*</sup>, Shazia Rafique<sup>1</sup>, Muhammad Idrees<sup>1</sup>, Asaad Khalid<sup>6,7</sup>, Ashraf N. Abdalla<sup>8</sup>, Ajmal Khan<sup>4\*</sup>, and Ahmed Al-Harrasi<sup>4\*</sup>

1. Centre of Excellence in Molecular Biology, University of the Punjab, 53700, Punjab, Pakistan.
  2. Department of Chemistry and Biochemistry, University of Windsor, ON, Canada.
  3. Department of Biotechnology and Genetic Engineering, Hazara University Mansehra 21120, Mansehra, Pakistan.
  4. Natural and Medical Sciences Research Center, University of Nizwa, Birkat-ul-Mouz 616, Nizwa, Oman
  5. Institute of Biotechnology and Genetic Engineering, the University of Agriculture Peshawar, Pakistan.
  6. Substance Abuse and Toxicology Research Center, Jazan University, P.O. Box: 114, Jazan 45142, Saudi Arabia.
  7. Medicinal and Aromatic Plants and Traditional Medicine Research Institute, National Center for Research, P. O. Box 2404, Khartoum, Sudan
  8. Department of Pharmacology and Toxicology, College of Pharmacy, Umm Al-Qura University, Makkah 21955, Saudi Arabia.
- †These authors have contributed equally to this work.

\* Correspondence: amjad.camb@pu.edu.pk (A.A.); ajmalkhan@unizwa.edu.om (A.K); aharrasi@unizwa.edu.om (A.A-H)

**A.** Multiple Sequence Alignment of Congo virus Asia-1 genotype genomes retrieved from NCBI with accession numbers AAM48107, AAK52742, BAB84572, AIE16134, ABB30033, AIE16135, ABB30035, ABB30032, AIE16129, AIE1612B8, AIE16130, AIE16131, AIE16133, AIE16132, AAW84284, AAK52743, ABB30029, BA84577, AF338470 and BAB84578

|            |            |            |            |            |            |            |            |            |            |
|------------|------------|------------|------------|------------|------------|------------|------------|------------|------------|
| AAM48107.1 | MSFNIMYTLI | LCAVLCQLW  | SSEGLHGLSN | ETQHGNASTI | KAFESVQGLG | LPVSTAPPTI | SDPPSITSAA | SVSGPEGSGB | TNTSPSVTTQ |
| BAB84577.1 | MSFSVMYTP  | LCAVLCQLW  | SLESHGLSN  | KTQHSNTSTT | KAFESVQELG | LPVSTVSTIT | SDPPSITSAA | SVSGSEGSGB | TNTSPSVTTQ |
| BAB84578.1 | MSFSVMYTP  | LCAVLCQLW  | SLESHGLSN  | KTQHSNTSTT | KAFESVQELG | LPVSTVSTIT | SDPPSITSAA | SVSGSEGSGB | TNTSPSVTTQ |
| AAK18286.1 | MSFSVMYTP  | LCAVLCQLW  | SLESHGLSN  | KTQHSNTSTT | KAFESVQELG | LPVSTVSTIT | SDPPSITSAA | SVSGSEGSGB | TNTSPSVTTQ |
| AAK52743.1 | MSFSVMYTP  | LCAVLCQLW  | SLESHGLSN  | KTQHSNTSTT | KAFESVQELG | LPVSTVSTIT | SEPPSITSAA | SVSGSEGSGB | TNTSPSVTTQ |
| AAW84284.1 | MSFSIMYTP  | LCAVLCQLW  | SLESHGLSN  | KTQHSNTSTT | KAFESVQELG | LPVSTVSTIT | SDPPSITSAA | SVSGSEGSGB | TNTSPSVTTQ |
| ABB30029.1 | MSFSIMYTP  | LCAVLCQLW  | SLESHGLSN  | KTQHSNTSTT | KAFESVQELG | LPVSTVSTIT | SDPPSITSAA | SVSGSEGSGB | TNTSPSVTTQ |
| AIE16128.1 | MPFNIMYTP  | LCAVLCQLW  | SLEGLYGLSN | KTQHNNTSTT | KAFESVQELG | LPVSTVSTIT | SDPPPTTPTA | SASGPEGSGB | TSTSPSVTTQ |
| AIE16130.1 | MPFNIMYTP  | LCAVLCQLW  | SLEGLYGLSN | KTQHNNTSTT | KAFESVQELG | LPVSTVSTIT | SDPPSITSAA | SASGPEGSGB | TSTSPSVTTQ |
| AIE16129.1 | MPFNIMYTP  | LCAVLCQLW  | SLEGLYGLSN | KTQHNNTSTT | KAFESVQELG | LPVSTVSTIT | SDPPSITSAA | SASGPEGSGB | TSTSPSVTTQ |
| AIE16131.1 | MPFNIMYTP  | LCAVLCQLW  | SLEGLYGLSN | KTQHNNTSTT | KAFESVQELG | LPVSTVSTIT | SDPPSITSAA | SASGPEGSGB | TSTSPSVTTQ |
| AIE16133.1 | MPFNIMYTP  | LCAVLCQLW  | SLEGLYGLSN | KTQHNNTSTT | KAFESVQELG | LPVSTVSTIT | SDPPSITSAA | SASGPEGSGB | TSTSPSVTTQ |
| AIE16132.1 | MPFNIMYTP  | LCAVLCQLW  | SLEGLYGLSN | KTQHNNTSTT | KAFESVQELG | LPVSTVSTIT | SDPPSITSAA | SASGPEGSGB | TSTSPSVTTQ |
| ABB30032.1 | MPVNTMHTLL | VYAVFCQLW  | SPGGTNGLSN | ETQHNNTSTT | KAFESVQELG | LPVSTVSTIT | SDPPSITSAA | SASGPEGSGB | TSTSPSVTTQ |
| ABB30033.1 | MTVNTVCTPI | VYAVFCQLW  | NLGGTLVPTN | RTQHNNTSTT | KAFESVQELG | LPVSTVSTIT | SDPPSITSAA | SASGPEGSGB | TSTSPSVTTQ |
| AIE16134.1 | MTVNTVCTPI | VYAVFCQLW  | NLGGTLVPTN | RTQHNNTSTT | KAFESVQELG | LPVSTVSTIT | SDPPSITSAA | SASGPEGSGB | TSTSPSVTTQ |
| ABB30035.1 | MPVNTMHTLL | VYAVFCQLW  | SPGGTNGLSN | ETQHNNTSTT | KAFESVQELG | LPVSTVSTIT | SDPPSITSAA | SASGPEGSGB | TSTSPSVTTQ |
| AIE16135.1 | MPVNTMHTLL | VYAVFCQLW  | SPGGTNGLSN | ETQHNNTSTT | KAFESVQELG | LPVSTVSTIT | SDPPSITSAA | SASGPEGSGB | TSTSPSVTTQ |
| AAK52742.1 | MPANIMYTLI | LCAVLCQLW  | SLEGLYGLSN | KTQHNNTSTT | KAFESVQELG | LPVSTVSTIT | SDPPSITSAA | SASGPEGSGB | TSTSPSVTTQ |
| BAB84572.1 | MPANIMYTLI | LCAVLCQLW  | SLEGLYGLSN | KTQHNNTSTT | KAFESVQELG | LPVSTVSTIT | SDPPSITSAA | SASGPEGSGB | TSTSPSVTTQ |
| Consensus  | MPFNIMYTP  | LCAVLCQLW  | SLEGLYGLSN | KTQHNNTSTT | KAFESVQELG | LPVSTVSTIT | SDPPSITSAA | SASGPEGSGB | TSTSPSVTTQ |
| AAM48107.1 | GTLPEITTE  | PLTTTDTGAS | STVYVDVSTQ | TVKDTPTSTT | HTSLPSTPSA | PTTPQGTHHT | ARGLLSVTST | KPEEASTQAN | PKKISMETNS |
| BAB84577.1 | GTLPEITTE  | PLTTTDTGAS | STVYVDVSTQ | TVKDTPTSTT | HTSLPSTPSA | PTTPQGTHHT | ARGLLSVTST | KPEEASTQAN | PKKISMETNS |
| BAB84578.1 | GTLPEITTE  | PLTTTDTGAS | STVYVDVSTQ | TVKDTPTSTT | HTSLPSTPSA | PTTPQGTHHT | ARGLLSVTST | KPEEASTQAN | PKKISMETNS |
| AAK18286.1 | GTLPEITTE  | PLTTTDTGAS | STVYVDVSTQ | TVKDTPTSTT | HTSLPSTPSA | PTTPQGTHHT | ARGLLSVTST | KPEEASTQAN | PKKISMETNS |
| AAK52743.1 | GTLPEITTE  | PLTTTDTGAS | STVYVDVSTQ | TVKDTPTSTT | HTSLPSTPSA | PTTPQGTHHT | ARGLLSVTST | KPEEASTQAN | PKKISMETNS |
| AAW84284.1 | GTLPEITTE  | PLTTTDTGAS | STVYVDVSTQ | TVKDTPTSTT | HTSLPSTPSA | PTTPQGTHHT | ARGLLSVTST | KPEEASTQAN | PKKISMETNS |
| ABB30029.1 | GTLPEITTE  | PLTTTDTGAS | STVYVDVSTQ | TVKDTPTSTT | HTSLPSTPSA | PTTPQGTHHT | ARGLLSVTST | KPEEASTQAN | PKKISMETNS |
| AIE16128.1 | GTPPETTPE  | PHTTTIDDKS | STAIADISTQ | TVKDTPTSTT | HTSLPSTPSA | PTTPQGTHHT | ARGLLSVTST | KPEEASTQAN | PKKISMETNS |
| AIE16130.1 | GTPPETTPE  | PHTTTIDDKS | STAIADISTQ | TVKDTPTSTT | HTSLPSTPSA | PTTPQGTHHT | ARGLLSVTST | KPEEASTQAN | PKKISMETNS |
| AIE16129.1 | GTPPETTPE  | PHTTTIDDKS | STAIADISTQ | TVKDTPTSTT | HTSLPSTPSA | PTTPQGTHHT | ARGLLSVTST | KPEEASTQAN | PKKISMETNS |
| AIE16131.1 | GTPPETTPE  | PHTTTIDDKS | STAIADISTQ | TVKDTPTSTT | HTSLPSTPSA | PTTPQGTHHT | ARGLLSVTST | KPEEASTQAN | PKKISMETNS |
| AIE16133.1 | GTPPETTPE  | PHTTTIDDKS | STAIADISTQ | TVKDTPTSTT | HTSLPSTPSA | PTTPQGTHHT | ARGLLSVTST | KPEEASTQAN | PKKISMETNS |
| AIE16132.1 | GTPPETTPE  | PHTTTIDDKS | STAIADISTQ | TVKDTPTSTT | HTSLPSTPSA | PTTPQGTHHT | ARGLLSVTST | KPEEASTQAN | PKKISMETNS |
| ABB30032.1 | GTPPETTPE  | PHTTTIDDKS | STAIADISTQ | TVKDTPTSTT | HTSLPSTPSA | PTTPQGTHHT | ARGLLSVTST | KPEEASTQAN | PKKISMETNS |
| ABB30033.1 | GTPPETTPE  | PHTTTIDDKS | STAIADISTQ | TVKDTPTSTT | HTSLPSTPSA | PTTPQGTHHT | ARGLLSVTST | KPEEASTQAN | PKKISMETNS |
| AIE16134.1 | GTPPETTPE  | PHTTTIDDKS | STAIADISTQ | TVKDTPTSTT | HTSLPSTPSA | PTTPQGTHHT | ARGLLSVTST | KPEEASTQAN | PKKISMETNS |
| ABB30035.1 | GTPPETTPE  | PHTTTIDDKS | STAIADISTQ | TVKDTPTSTT | HTSLPSTPSA | PTTPQGTHHT | ARGLLSVTST | KPEEASTQAN | PKKISMETNS |
| AIE16135.1 | GTPPETTPE  | PHTTTIDDKS | STAIADISTQ | TVKDTPTSTT | HTSLPSTPSA | PTTPQGTHHT | ARGLLSVTST | KPEEASTQAN | PKKISMETNS |
| AAK52742.1 | GTPPETTPE  | PHTTTIDDKS | STAIADISTQ | TVKDTPTSTT | HTSLPSTPSA | PTTPQGTHHT | ARGLLSVTST | KPEEASTQAN | PKKISMETNS |
| BAB84572.1 | GTPPETTPE  | PHTTTIDDKS | STAIADISTQ | TVKDTPTSTT | HTSLPSTPSA | PTTPQGTHHT | ARGLLSVTST | KPEEASTQAN | PKKISMETNS |
| Consensus  | GTLPEITTE  | PLTTTDTGAS | STVYVDVSTQ | TVKDTPTSTT | HTSLPSTPSA | PTTPQGTHHT | ARGLLSVTST | KPEEASTQAN | PKKISMETNS |
| AAM48107.1 | PGPATSETPS | PSPTTQAPTE | NNNPNTSRQP | TPPTQPATPS | PVTPSP--AL | LASSQGDSTT | AVQDVHPSPT | NRSKRNLME  | ITLTLSQGLK |
| BAB84577.1 | PRPAISETPS | PSPTTQAPTE | NNNPNTSRQP | TPPTQPATPS | PVTPSP--AL | LASSQGDSTT | AVQDVHPSPT | NRSKRNLME  | ITLTLSQGLK |
| BAB84578.1 | PRPAISETPS | PSPTTQAPTE | NNNPNTSRQP | TPPTQPATPS | PVTPSP--AL | LASSQGDSTT | AVQDVHPSPT | NRSKRNLME  | ITLTLSQGLK |
| AAK18286.1 | PRPAISETPS | PSPTTQAPTE | NNNPNTSRQP | TPPTQPATPS | PVTPSP--AL | LASSQGDSTT | AVQDVHPSPT | NRSKRNLME  | ITLTLSQGLK |
| AAK52743.1 | PRPAISETPS | PSPTTQAPTE | NNNPNTSRQP | TPPTQPATPS | PVTPSP--AL | LASSQGDSTT | AVQDVHPSPT | NRSKRNLME  | ITLTLSQGLK |
| AAW84284.1 | PRPAISETPS | PSPTTQAPTE | NNNPNTSRQP | TPPTQPATPS | PVTPSP--AL | LASSQGDSTT | AVQDVHPSPT | NRSKRNLME  | ITLTLSQGLK |
| ABB30029.1 | PRPAISETPS | PSPTTQAPTE | NNNPNTSRQP | TPPTQPATPS | PVTPSP--AL | LASSQGDSTT | AVQDVHPSPT | NRSKRNLME  | ITLTLSQGLK |
| AIE16128.1 | PQPTIRETSP | PPPTTQAPTE | NNNPNTSRQP | TPPTQPATPS | PVTPSP--AL | LASSQGDSTT | AVQDVHPSPT | NRSKRNLME  | ITLTLSQGLK |
| AIE16130.1 | PQPTIRETSP | PPPTTQAPTE | NNNPNTSRQP | TPPTQPATPS | PVTPSP--AL | LASSQGDSTT | AVQDVHPSPT | NRSKRNLME  | ITLTLSQGLK |
| AIE16129.1 | PQPTIRETSP | PPPTTQAPTE | NNNPNTSRQP | TPPTQPATPS | PVTPSP--AL | LASSQGDSTT | AVQDVHPSPT | NRSKRNLME  | ITLTLSQGLK |
| AIE16131.1 | PQPTIRETSP | PPPTTQAPTE | NNNPNTSRQP | TPPTQPATPS | PVTPSP--AL | LASSQGDSTT | AVQDVHPSPT | NRSKRNLME  | ITLTLSQGLK |
| AIE16133.1 | PQPTIRETSP | PPPTTQAPTE | NNNPNTSRQP | TPPTQPATPS | PVTPSP--AL | LASSQGDSTT | AVQDVHPSPT | NRSKRNLME  | ITLTLSQGLK |
| AIE16132.1 | PQPTIRETSP | PPPTTQAPTE | NNNPNTSRQP | TPPTQPATPS | PVTPSP--AL | LASSQGDSTT | AVQDVHPSPT | NRSKRNLME  | ITLTLSQGLK |
| ABB30032.1 | PQPTIRETSP | PPPTTQAPTE | NNNPNTSRQP | TPPTQPATPS | PVTPSP--AL | LASSQGDSTT | AVQDVHPSPT | NRSKRNLME  | ITLTLSQGLK |
| ABB30033.1 | PQPTIRETSP | PPPTTQAPTE | NNNPNTSRQP | TPPTQPATPS | PVTPSP--AL | LASSQGDSTT | AVQDVHPSPT | NRSKRNLME  | ITLTLSQGLK |
| AIE16134.1 | PQPTIRETSP | PPPTTQAPTE | NNNPNTSRQP | TPPTQPATPS | PVTPSP--AL | LASSQGDSTT | AVQDVHPSPT | NRSKRNLME  | ITLTLSQGLK |
| ABB30035.1 | PQPTIRETSP | PPPTTQAPTE | NNNPNTSRQP | TPPTQPATPS | PVTPSP--AL | LASSQGDSTT | AVQDVHPSPT | NRSKRNLME  | ITLTLSQGLK |
| AIE16135.1 | PQPTIRETSP | PPPTTQAPTE | NNNPNTSRQP | TPPTQPATPS | PVTPSP--AL | LASSQGDSTT | AVQDVHPSPT | NRSKRNLME  | ITLTLSQGLK |
| AAK52742.1 | PRPAISRKPT | PSPTTQAPTE | NNNPNTSRQP | TPPTQPATPS | PVTPSP--AL | LASSQGDSTT | AVQDVHPSPT | NRSKRNLME  | ITLTLSQGLK |
| BAB84572.1 | PRPAISRKPT | PSPTTQAPTE | NNNPNTSRQP | TPPTQPATPS | PVTPSP--AL | LASSQGDSTT | AVQDVHPSPT | NRSKRNLME  | ITLTLSQGLK |
| Consensus  | PRPAISETPS | PSPTTQAPTE | NNNPNTSRQP | TPPTQPATPS | PVTPSP--AL | LASSQGDSTT | AVQDVHPSPT | NRSKRNLME  | ITLTLSQGLK |

|             | 280        |            | 300        |            | 320        |            | 340         |            | 360         |
|-------------|------------|------------|------------|------------|------------|------------|-------------|------------|-------------|
| AAM48107.1  | KYYGKILKLL | DLTLEEDTEG | LLEWCKRNIG | LYCDDNFFQK | RIEEFFLTGE | GHFNEVLOFK | TPSTLSPTTEP | ARAGSPVTEP | FKSYFARGLL  |
| BAB84577.1  | KYYGKILKLL | DLTLEEDTEG | LLEWCKRNIG | LYCDDNFFQK | RIEEFFLTGK | GHFNEVLOFK | TPSTLSPTGP  | ARTGSPVTEP | FKSYFAKGFLL |
| BAB84578.1  | KYYGKILKLL | DLTLEEDTEG | LLEWCKRNIG | LYCDDNFFQK | RIEEFFLTGK | GHFNEVLOFK | TPSTLSPTGP  | ARTGSPVTEP | FKSYFAKGFLL |
| AAK18286.1  | KYYGKILKLL | DLTLEEDTEG | LLEWCKRNIG | LYCDDNFFQK | RIEEFFLTGK | GHFNEVLOFK | TPSTLSPTGP  | ARTGSPVTEP | FKSYFAKGFLL |
| AAK52743.1  | KYYGKILKLL | DLTLEEDTEG | LLEWCKRNIG | LYCDDNFFQK | RIEEFFLTGK | GHFNEVLOFK | TPSTLSPTGP  | ARTGSPVTEP | FKSYFAKGFLL |
| AAW84284.1  | KYYGKILKLL | DLTLEEDTEG | LLEWCKRNIG | LYCDDNFFQK | RIEEFFLTGE | GHFNEVLOFK | TPSTLSPTGP  | ARTGSPVTEP | FKSYFAKGFLL |
| ABB30029.1  | KYYGKILKLL | DLTLEEDTEG | LLEWCKRNIG | LYCDDNFFQK | RIEEFFLTGE | GHFNEVLOFK | TPSTLSPTGP  | ARTGSPVTEP | FKSYFAKGFLL |
| AIIE16128.1 | KYYGKILKLL | DLTLEEDTEG | LLEWCKRNIG | LTCDDNFFQK | RIEEFFLTGE | GHFNEVLOFK | TPSTLSPTTEP | ARVESPTVEP | FKSYFAKGFLL |
| AIIE16130.1 | KYYGKILKLL | DLTLEEDTEG | LLEWCKRNIG | LTCDDNFFQK | RIEEFFLTGE | GHFNEVLOFK | TPSTLSPTTEP | ARVESPTVEP | FKSYFAKGFLL |
| AIIE16129.1 | KYYGKILKLL | DLTLEEDTEG | LLEWCKRNIG | LTCDDNFFQK | RIEEFFLTGE | GHFNEVLOFK | TPSTLSPTTEP | ARVESPTVEP | FKSYFAKGFLL |
| AIIE16131.1 | KYYGKILKLL | DLTLEEDTEG | LLEWCKRNIG | LTCDDNFFQK | RIEEFFLTGE | GHFNEVLOFK | TPSTLSPTTEP | ARVESPTVEP | FKSYFAKGFLL |
| AIIE16133.1 | KYYGKILKLL | DLTLEEDTEG | LLEWCKRNIG | LTCDDNFFQK | RIEEFFLTGE | GHFNEVLOFK | TPSTLSPTTEP | ARVESPTVEP | FKSYFAKGFLL |
| AIIE16132.1 | KYYGKILKLL | DLTLEEDTEG | LLEWCKRNIG | LTCDDNFFQK | RIEEFFLTGE | GHFNEVLOFK | TPSTPSPTKP  | AHVESPTVEP | FKSYFAKGFLL |
| ABB30032.1  | KYYGKILKLL | DLTLEEDTEG | LLEWCKRNIG | LTCDDNFFQK | RIEEFFLTGE | GHFNEVLOFK | TPSTLSSTES  | ASVGLPTVEP | FKSYFAKGFLL |
| ABB30033.1  | KYYGKILKLL | DLTLEEDTEG | LLEWCKRNIG | LTCDDNFFQK | RIEEFFLTGE | GYFNEVLOFK | VPSTLSSTEP  | THTGSPVTEP | FKSYFAKGFLL |
| AIIE16134.1 | KYYGKILKLL | DLTLEEDTEG | LLEWCKRNIG | LTCDDNFFQK | RIEEFFLTGE | GYFNEVLOFK | VPSTLSSTEP  | THTGSPVTEP | FKSYFAKGFLL |
| ABB30035.1  | KYYGKILKLL | DLTLEEDTEG | LLEWCKRNIG | LTCDDNFFQK | RIEEFFLTGE | GYFNEVLOFK | VPSTLSSTEP  | THTRPPTVEP | FKSYFAKGFLL |
| AIIE16135.1 | KYYGKILKLL | DLTLEEDTEG | LLEWCKRNIG | LTCDDNFFQK | RIEEFFLTGE | GYFNEVLOFK | VPSTLSSTEP  | THTRPPTVEP | FKSYFAKGFLL |
| AAK52742.1  | KYYGKILKLL | DLTLEEDTEG | LLEWCKRNIG | LTCDDNFFQK | RIEEFFLTGE | GYFNEVLOFK | TPSTPGSTEP  | THAEAPTVEP | FKSYFAKGFLL |
| BAB84572.1  | KYYGKILKLL | DLTLEEDTEG | LLEWCKRNIG | LTCDDNFFQK | RIEEFFLTGE | GYFNEVLOFK | TPSTPGSTEP  | THAEAPTVEP | FKSYFAKGFLL |
| Consensus   | KYYGKILKLL | DLTLEEDTEG | LLEWCKRNIG | LTCDDNFFQK | RIEEFFLTGE | GHFNEVLOFK | TPSTLSPTTEP | ARTGSPVTEP | FKSYFAKGFLL |

|             | 380 |   |   |   |   |   |   |   |   |   | 400 |   |   |   |   |   |   |   |   |   | 420 |   |   |   |   |   |   |   |   |   | 440 |   |   |   |   |   |   |   |   |   |   |   |   |   |   |   |   |   |   |   |   |   |   |   |   |   |   |   |   |   |   |   |   |   |   |   |   |   |   |   |   |   |   |   |   |   |   |   |   |   |   |   |   |   |   |   |   |   |   |   |
|-------------|-----|---|---|---|---|---|---|---|---|---|-----|---|---|---|---|---|---|---|---|---|-----|---|---|---|---|---|---|---|---|---|-----|---|---|---|---|---|---|---|---|---|---|---|---|---|---|---|---|---|---|---|---|---|---|---|---|---|---|---|---|---|---|---|---|---|---|---|---|---|---|---|---|---|---|---|---|---|---|---|---|---|---|---|---|---|---|---|---|---|---|---|
| AAM48107.1  | S   | M | D | S | G | Y | F | S | A | K | C   | Y | P | R | A | S | N | S | G | L | Q   | L | N | I | T | Q | H | S | A | R | I   | T | D | T | P | G | P | K | I | T | N | L | K | T | I | N | C | I | N | L | K | A | S | T | F | K | E | H | R | E | I | E | I | N | V | L | L | P | Q | V | A | N | L | S | S | C | H | V | L | I | K | S | H | V | C | D | Y | S |   |   |
| BAB84577.1  | S   | M | D | S | G | Y | F | S | A | K | C   | Y | P | R | A | S | N | S | G | L | Q   | L | N | I | T | Q | H | S | T | R | I   | T | D | T | P | G | P | K | I | T | N | L | K | T | I | N | C | I | N | L | K | A | S | T | F | K | E | H | R | E | I | E | I | N | V | L | L | P | Q | V | A | N | L | S | S | C | H | V | L | I | K | S | H | V | C | D | Y | S |   |   |
| BAB84578.1  | S   | M | D | S | G | Y | F | S | A | K | C   | Y | P | R | A | S | N | S | G | L | Q   | L | N | I | T | Q | H | S | T | R | I   | T | D | T | P | G | P | K | I | T | N | L | K | T | I | N | C | I | N | L | K | A | S | T | F | K | E | H | R | E | I | E | I | N | V | L | L | P | Q | V | A | N | L | S | S | C | H | V | L | I | K | S | H | V | C | D | Y | S |   |   |
| AAK18286.1  | S   | M | D | S | G | Y | F | S | A | K | C   | Y | P | R | A | S | N | S | G | L | Q   | L | N | I | T | Q | H | S | T | R | I   | T | D | T | P | G | P | K | I | T | N | L | K | T | I | N | C | I | N | L | K | A | S | T | F | K | E | H | R | E | I | E | I | N | V | L | L | P | Q | V | A | N | L | S | S | C | H | V | L | I | K | S | H | V | C | D | Y | S |   |   |
| AAK52743.1  | S   | M | D | S | G | Y | F | S | A | K | C   | Y | P | R | A | S | N | S | G | L | Q   | L | N | I | T | Q | H | S | T | R | I   | T | D | T | P | G | P | K | I | T | N | L | K | T | I | N | C | I | N | L | K | A | S | T | F | K | E | H | R | E | I | E | I | N | V | L | L | P | Q | V | A | N | L | S | S | C | H | V | L | I | K | S | H | V | C | D | Y | S |   |   |
| AAW84284.1  | S   | M | D | S | G | Y | F | S | A | K | C   | Y | P | R | A | S | N | S | G | L | Q   | L | N | I | T | Q | H | S | T | R | I   | T | D | T | P | G | P | K | I | T | N | L | K | T | I | N | C | I | N | L | K | A | S | T | F | K | E | H | R | E | I | E | I | N | V | L | L | P | Q | V | A | N | L | S | S | C | H | V | L | I | K | S | H | V | C | D | Y | S |   |   |
| ABB30029.1  | S   | M | D | S | G | Y | F | S | A | K | C   | Y | P | R | A | S | N | S | G | L | Q   | L | N | I | T | Q | H | S | T | R | I   | T | D | T | P | G | P | K | I | T | N | L | K | T | I | N | C | I | N | L | K | A | S | T | F | K | E | H | R | E | I | E | I | N | V | L | L | P | Q | V | A | N | L | S | S | C | H | V | L | I | K | S | H | V | C | D | Y | S |   |   |
| AIIE16128.1 | L   | M | D | S | G | Y | F | S | A | K | C   | Y | P | K | S | S | N | S | G | L | Q   | L | N | I | T | Q | H | L | I | R | I   | T | D | T | P | G | P | K | I | T | N | L | K | T | I | N | C | I | N | L | K | A | L | V | F | K | E | H | R | E | I | E | I | N | V | L | L | P | Q | V | A | N | L | S | N | C | H | V | L | I | K | S | H | V | C | D | Y | S |   |   |
| AIIE16130.1 | S   | M | D | S | G | Y | F | S | A | K | C   | Y | P | K | S | S | N | S | G | L | Q   | L | N | I | T | Q | H | L | I | R | I   | T | D | T | P | G | P | K | I | T | N | L | K | T | I | N | C | I | N | L | K | A | L | V | F | K | E | H | R | E | I | E | I | N | V | L | L | P | Q | V | A | N | L | S | N | C | H | V | L | I | K | S | H | V | C | D | Y | S |   |   |
| AIIE16131.1 | S   | M | D | S | G | Y | F | S | A | K | C   | Y | P | K | S | S | N | S | G | L | Q   | L | N | I | T | Q | H | L | I | R | I   | T | D | T | P | G | P | K | I | T | N | L | K | T | I | N | C | I | N | L | K | A | L | V | F | K | E | H | R | E | I | E | I | N | V | L | L | P | Q | V | A | N | L | S | N | C | H | V | L | I | K | S | H | V | C | D | Y | S |   |   |
| AIIE16133.1 | S   | M | D | S | G | Y | F | S | A | K | C   | Y | P | K | S | S | N | S | G | L | Q   | L | N | I | T | Q | H | S | I | R | I   | T | D | T | P | G | P | K | I | T | N | L | K | T | I | N | C | I | N | L | K | A | L | V | F | K | E | H | R | E | I | E | I | N | V | L | L | P | Q | V | A | N | L | S | N | C | H | V | L | I | K | S | H | V | C | D | Y | S |   |   |
| AIIE16132.1 | S   | M | D | S | G | Y | F | S | A | K | C   | Y | P | K | S | S | N | S | G | L | Q   | L | N | I | T | Q | H | S | I | R | I   | T | D | T | P | G | P | K | I | T | N | L | K | T | I | N | C | I | N | L | K | A | L | V | F | K | E | H | R | E | I | E | I | N | V | L | L | P | Q | V | A | N | L | S | N | C | H | V | L | I | K | S | H | V | C | D | Y | S |   |   |
| ABB30032.1  | S   | I | D | S | G | Y | F | S | A | K | C   | Y | P | R | A | S | N | S | G | L | Q   | L | N | I | T | Q | H | S | A | R | I   | A | D | T | P | G | P | K | I | T | N | L | K | T | I | N | C | I | N | L | K | A | L | V | F | K | E | H | R | E | I | E | I | N | V | L | L | P | Q | V | A | N | L | S | N | C | H | V | L | I | K | S | H | V | C | D | Y | S |   |   |
| ABB30033.1  | S   | M | N | S | G | Y | F | S | A | K | C   | Y | P | R | T | S | N | S | G | L | Q   | L | N | I | T | V | T | K | H | S | A   | K | I | A | D | T | P | G | P | K | I | T | N | L | K | T | I | N | C | I | N | L | K | A | S | T | F | K | E | H | R | E | I | E | I | N | V | L | L | P | Q | V | A | N | L | S | N | C | H | V | L | I | K | S | H | V | C | D | Y | S |
| AIIE16134.1 | S   | M | N | S | G | Y | F | S | A | K | C   | Y | P | R | T | S | N | S | G | L | Q   | L | N | I | T | V | T | K | H | S | A   | K | I | A | D | T | P | G | P | K | I | T | N | L | K | T | I | N | C | I | N | L | K | A | S | T | F | K | E | H | R | E | I | E | I | N | V | L | L | P | Q | V | A | N | L | S | N | C | H | V | L | I | K | S | H | V | C | D | Y | S |
| ABB30035.1  | S   | M | N | S | G | Y | F | S | A | K | C   | Y | P | R | T | S | N | S | G | L | Q   | L | N | I | T | V | T | K | H | S | A   | K | I | A | D | T | P | G | P | K | I | T | N | L | K | T | I | N | C | I | N | L | K | A | S | T | F | K | E | H | R | E | I | E | I | N | V | L | L | P | Q | V | A | N | L | S | N | C | H | V | L | I | K | S | H | V | C | D | Y | S |
| AIIE16135.1 | S   | M | N | S | G | Y | F | S | A | K | C   | Y | P | R | T | S | N | S | G | L | Q   | L | N | I | T | V | T | K | H | S | A   | K | I | A | D | T | P | G | P | K | I | T | N | L | K | T | I | N | C | I | N | L | K | A | S | T | F | K | E | H | R | E | I | E | I | N | V | L | L | P | Q | V | A | N | L | S | N | C | H | V | L | I | K | S | H | V | C | D | Y | S |
| AAK52742.1  | T   | I | N | S | G | Y | F | S | A | K | C   | Y | S | W | T | S | N | S | G | L | Q   | L | N | I | T | Q | H | P | A | R | I   | A | D | T | P | G | P | K | I | T | N | L | K | T | I | N | C | I | N | L | K | A | S | T | F | K | E | H | R | E | I | E | I | N | V | L | L | P | Q | V | A | N | L | S | N | C | H | V | L | I | K | S | H | V | C | D | Y | S |   |   |
| BAB84572.1  | T   | I | D | S | G | Y | F | S | A | K | C   | Y | S | R | T | S | N | S | G | L | Q   | L | N | I | T | Q | H | P | A | R | I   | A | D | T | P | G | P | K | I | T | N | L | K | T | I | N | C | I | N | L | K | A | S | T | F | K | E | H | R | E | I | E | I | N | V | L | L | P | Q | V | A | N | L | S | N | C | H | V | L | I | K | S | H | V | C | D | Y | S |   |   |
| Consensus   | S   | M | D | S | G | Y | F | S | A | K | C   | Y | P | R | A | S | N | S | G | L | Q   | L | N | I | T | Q | H | S | A | R | I   | T | D | T | P | G | P | K | I | T | N | L | K | T | I | N | C | I | N | L | K | A | S | T | F | K | E | H | R | E | I | E | I | N | V | L | L | P | Q | V | A | N | L | S | S | C | H | V | L | I | K | S | H | V | C | D | Y | S |   |   |

|            | 460 |   | 480 |   | 500 |   | 520 |   | 540 |   |   |   |   |   |   |   |   |   |   |   |   |   |   |   |   |   |   |   |   |   |   |   |   |   |   |   |   |   |   |   |   |   |   |   |   |   |   |   |   |   |   |   |   |   |   |   |   |   |   |   |   |   |   |   |   |   |   |   |   |   |   |   |   |   |   |   |   |   |   |   |   |   |   |   |   |   |   |   |   |   |   |
|------------|-----|---|-----|---|-----|---|-----|---|-----|---|---|---|---|---|---|---|---|---|---|---|---|---|---|---|---|---|---|---|---|---|---|---|---|---|---|---|---|---|---|---|---|---|---|---|---|---|---|---|---|---|---|---|---|---|---|---|---|---|---|---|---|---|---|---|---|---|---|---|---|---|---|---|---|---|---|---|---|---|---|---|---|---|---|---|---|---|---|---|---|---|---|
| AAM48107.1 | L   | D | I   | D | G   | P | V   | R | L   | P | R | I | H | H | E | G | T | F | I | P | G | T | Y | K | I | V | I | D | K | K | N | K | Q | N | D | R | C | T | L | V | T | N | C | V | I | K | G | R | E | I | R | K | G | Q | S | V | L | R | Q | Y | R | T | E | I | K | I | G | K | A | S | S | G | S | R | R | L | L | S | E | E | S | G | D | D | C | I | S | R | T | Q |   |
| BAB84577.1 | L   | D | I   | D | G   | P | V   | R | L   | P | R | I | H | H | E | G | T | F | I | P | G | T | Y | K | I | V | I | D | K | K | N | K | Q | N | D | R | C | T | L | V | T | N | C | V | I | K | G | R | E | I | R | K | G | Q | S | V | L | R | Q | Y | R | T | E | I | K | I | G | K | A | S | S | G | S | R | R | L | L | S | E | E | S | G | D | D | C | I | S | R | T | Q |   |
| BAB84578.1 | L   | D | I   | D | G   | P | V   | R | L   | P | R | I | H | H | E | G | T | F | I | P | G | T | Y | K | I | V | I | D | K | K | N | K | Q | N | D | R | C | T | L | V | T | N | C | V | I | K | G | R | E | I | R | K | G | Q | S | V | L | R | Q | Y | R | T | E | I | K | I | G | K | A | S | S | G | S | R | R | L | L | S | E | E | S | G | D | D | C | I | S | R | T | Q |   |
| AAK18286.1 | L   | D | I   | D | G   | P | V   | R | L   | P | R | I | H | H | E | G | T | F | I | P | G | T | Y | K | I | V | I | D | K | K | N | K | Q | N | D | R | C | T | L | V | T | N | C | V | I | K | G | R | E | I | R | K | G | Q | S | V | L | R | Q | Y | R | T | E | I | K | I | G | K | A | S | S | G | S | R | R | L | L | S | E | E | S | G | D | D | C | I | S | R | T | Q |   |
| AAK52743.1 | L   | D | I   | D | G   | P | V   | R | L   | P | R | I | H | H | E | G | T | F | I | P | G | T | Y | K | I | V | I | D | K | K | N | K | Q | N | D | R | C | T | L | V | T | N | C | V | I | K | G | R | E | I | R | K | G | Q | S | V | L | R | Q | Y | R | T | E | I | K | I | G | K | A | S | S | G | S | R | R | L | L | S | E | E | S | G | D | D | C | I | S | R | T | Q |   |
| AAW84284.1 | L   | D | I   | D | G   | P | V   | R | L   | P | R | I | H | H | E | G | T | F | I | P | G | T | Y | K | I | V | I | D | K | K | N | K | Q | N | D | R | C | T | L | V | T | N | C | V | I | K | G | R | E | I | R | K | G | Q | S | V | L | R | Q | Y | R | T | E | I | K | I | G | K | A | S | S | G | S | R | R | L | L | S | E | E | S | G | D | D | C | I | S | R | T | Q |   |
| ABB30029.1 | L   | D | I   | D | G   | P | V   | R | L   | P | R | I | H | H | E | G | T | F | I | P | G | T | Y | K | I | V | I | D | K | K | N | K | Q | N | D | R | C | T | L | I | V | T | N | C | V | I | K | G | R | E | I | R | K | G | Q | S | V | L | R | Q | Y | R | T | E | I | K | I | G | K | A | S | S | G | S | R | R | L | L | S | E | E | S | G | D | D | C | I | S | R | T | Q |
| AEI61628.1 | L   | D | I   | D | G   | P | V   | R | L   | P | R | I | H | H | E | G | T | F | I | P | G | T | Y | K | I | V | I | D | K | K | N | K | Q | N | D | R | C | T | L | V | T | N | C | V | I | K | G | R | E | I | R | K | G | Q | S | V | L | R | Q | Y | R | T | E | I | K | I | G | K | A | S | S | G | S | R | R | L | L | S | E | E | S | N | D | D | C | I | S | R | T | Q |   |
| AEI6130.1  | L   | D | I   | D | G   | P | V   | R | L   | P | S | I | H | H | E | G | T | F | I | P | G | T | Y | K | I | V | I | D | K | K | N | K | Q | N | D | R | C | T | L | V | T | N | C | V | I | K | G | R | E | I | R | K | G | Q | S | V | L | R | Q | Y | R | T | E | I | K | I | G | K | A | S | S | G | S | R | R | L | L | S | E | E | P | N | Y | D | C | I | S | R | T | Q |   |
| AEI61629.1 | L   | D | I   | D | G   | P | V   | R | L   | P | R | I | H | H | E | G | T | F | I | P | G | T | Y | K | I | V | I | D | K | K | N | K | Q | N | D | R | C | T | L | V | T | N | C | V | I | K | G | R | E | I | R | K | G | Q | S | V | L | R | Q | Y | R | T | E | I | K | I | G | K | A | S | S | G | S | R | R | L | L | S | E | E | S | N | D | D | C | I | S | R | T | Q |   |
| AEI61631.1 | L   | D | I   | D | G   | P | V   | R | L   | P | R | I | H | H | E | G | T | F | I | P | G | T | Y | K | I | V | I | D | K | K | T | K | Q | N | D | R | C | T | L | V | T | N | C | V | I | K | G | R | E | I | R | K | G | Q | S | V | L | R | Q | Y | R | T | E | I | K | I | G | K | A | S | S | G | S | R | R | L | L | S | E | E | S | N | D | D | C | I | S | R | T | Q |   |
| AEI61633.1 | L   | D | I   | D | G   | P | V   | R | L   | P | R | I | H | H | E | G | T | F | I | P | G | T | Y | K | I | V | I | D | K | K | N | K | Q | N | D | R | C | T | L | V | T | N | C | V | I | K | G | R | E | I | R | K | G | Q | S | V | L | R | Q | Y | R | T | E | I | K | I | G | K | A | S | S | G | S | R | R | L | L | S | E | E | S | N | D | D | C | I | S | R | T | Q |   |
| AEI61632.1 | L   | D | I   | D | G   | P | V   | R | L   | P | H | I | H | H | E | G | T | F | I | P | G | T | Y | K | I | V | I | D | K | K | D | K | Q | N | D | R | C | T | L | V | T | N | C | V | I | K | G | R | E | I | R | K | G | Q | S | V | L | R | Q | Y | R | T | E | I | K | I | G | K | A | S | S | G | S | R | R | L | L | S | E | E | S | S | D | D | C | I | S | R | T | Q |   |
| ABB30032.1 | L   | D | I   | D | G   | T | I   | R | L   | P | R | I | H | H | E | G | T | F | I | P | G | T | Y | K | I | V | I | D | K | K | N | K | Q | N | D | R | C | N | L | V | T | N | C | V | I | K | G | R | E | I | R | K | G | Q | S | V | L | R | Q | Y | R | T | E | I | R | I | G | K | A | S | S | G | S | R | R | L | L | S | E | E | S | G | D | E | C | I | S | R | T | Q |   |
| ABB30033.1 | L   | A | T   | D | G   | M | V   | R | L   | P | R | I | H | H | E | G | T | F | I | P | G | T | Y | K | I | V | I | D | K | K | N | K | Q | N | D | R | C | T | L | V | T | N | C | V | I | K | G | R | E | I | R | K | G | Q | S | A | L | R | Q | Y | R | T | E | I | R | I | G | K | A | S | S | G | S | R | R | L | L | S | E | E | S | D | G | D | C | I | S | R | T | Q |   |
| AEI61634.1 | L   | A | T   | D | G   | M | V   | R | L   | P | R | I | H | H | E | G | T | F | I | P | G | T | Y | K | I | V | I | D | K | K | N | K | Q | N | D | R | C | T | L | V | T | N | C | V | I | K | G | R | E | I | R | K | G | Q | S | A | L | R | Q | Y | R | T | E | I | R | I | G | K | A | S | S | G | S | R | R | L | L | S | E | E | S | D | G | D | C | I | S | R | T | Q |   |
| ABB30035.1 | L   | A | T   | D | G   | M | V   | R | L   | P | H | I | H | H | E | G | T | F | I | P | G | T | Y | K | I | V | I | D | K | K | N | K | Q | N | D | R | C | T | L | V | T | N | C | V | I | K | G | R | E | I | R | K | G | Q | S | A | L | R | Q | Y | R | T | E | I | R | I | G | K | A | S | S | G | S | R | R | L | L | S | E | E | S | D | G | D | C | I | S | R | T | Q |   |
| AEI61635.1 | L   | A | T   | D | G   | M | V   | R | L   | P | R | I | H | H | E | G | T | F | I | P | G | T | Y | K | I | V | I | D | K | K | N | K | Q | N | D | R | C | T | L | V | T | N | C | V | I | K | G | R | E | I | R | K | G | Q | S | A | L | R | Q | Y | R | T | E | I | R | I | G | K | A | S | S | G | S | R | R | L | L | S | E | E | S | D | G | D | C | I | S | R | T | Q |   |
| AAK52742.1 | L   | D | I   | D | G   | T | I   | R | L   | P | R | I | Y | H | E | G | T | F | I | P | G | T | Y | K | I | V | I | D | K | K | D | K | Q | N | D | R | C | T | L | V | T | N | C | V | I | K | G | R | E | I | R | K | G | Q | S | A | L | R | Q | Y | R | T | E | I | R | I | G | K | A | S | S | G | S | R | R | L | L | S | E | E | S | G | D | D | C | I | S | R | T | Q |   |
| BAB84572.1 | L   | D | I   | D | G   | T | I   | R | L   | P | R | I | Y | H | E | G | T | F | I | P | G | T | Y | K | I | V | I | D | K | K | N | K | Q | N | D | R | C | T | L | V | T | N | C | V | I | K | G | R | E | I | R | K | G | Q | S | A | L | R | Q | Y | R | T | E | I | R | I | G | K | A | S | S | G | S | R | R | L | L | S | E | E | S | G | D | D | C | I | S | R | T | Q |   |
| Consensus  | L   | D | I   | D | G   | P | V   | R | L   | P | R | I | H | H | E | G | T | F | I | P | G | T | Y | K | I | V | I | D | K | K | N | K | Q | N | D | R | C | T | L | V | T | N | C | V | I | K | G | R | E | I | R | K | G | Q | S | V | L | R | Q | Y | R | T | E | I | K | I | G | K | A | S | S | G | S | R | R | L | L | S | E | E | S | G | D | D | C | I | S | R | T | Q |   |

|            | 560 |   |   |   |   |   |   |   |   |   | 580 |   |   |   |   |   |   |   |   |   | 600 |   |   |   |   |   |   |   |   |   | 620 |   |   |   |   |   |   |   |   |   |   |   |   |   |   |   |   |   |   |   |   |   |   |   |   |   |   |   |   |   |   |   |   |   |   |   |   |   |   |   |   |   |   |   |   |   |   |   |   |   |   |   |   |   |   |   |   |   |   |   |
|------------|-----|---|---|---|---|---|---|---|---|---|-----|---|---|---|---|---|---|---|---|---|-----|---|---|---|---|---|---|---|---|---|-----|---|---|---|---|---|---|---|---|---|---|---|---|---|---|---|---|---|---|---|---|---|---|---|---|---|---|---|---|---|---|---|---|---|---|---|---|---|---|---|---|---|---|---|---|---|---|---|---|---|---|---|---|---|---|---|---|---|---|---|
| AAM48107.1 | L   | L | R | T | E | T | A | E | I | H | S   | D | S | Y | G | G | P | G | D | K | I   | T | I | C | N | G | S | T | V | D | Q   | R | L | G | S | E | L | G | C | Y | T | I | N | R | Y | K | S | F | K | L | C | E | N | S | A | T | G | K | S | C | E | I | D | S | T | P | V | K | C | R | Q | G | F | C | L | K | I | T | Q | E | G | R | G | H | V | K | L | S | R |   |
| BAB84577.1 | L   | L | R | T | E | T | A | E | I | H | N   | D | N | Y | G | G | P | G | D | K | I   | T | I | C | N | G | S | T | V | D | Q   | R | L | G | S | E | L | G | C | Y | T | I | N | R | Y | K | S | F | K | L | C | E | N | S | A | T | G | K | S | C | E | I | D | S | T | P | V | K | C | R | Q | G | F | C | L | K | I | T | Q | E | G | R | G | H | V | K | L | S | R |   |
| BAB84578.1 | L   | L | R | T | E | T | A | E | I | H | S   | D | N | Y | G | G | P | G | D | K | I   | T | I | C | N | G | S | T | V | D | Q   | R | L | G | S | E | L | G | C | Y | T | I | N | R | Y | K | S | F | K | L | C | E | N | S | A | T | G | K | S | C | E | I | D | S | T | P | V | K | C | R | Q | G | F | C | L | K | I | T | Q | E | G | R | G | H | V | K | L | S | R |   |
| AAK18286.1 | L   | L | R | T | E | T | A | E | I | H | S   | D | N | Y | G | G | P | G | D | K | I   | T | I | C | N | G | S | T | V | D | Q   | R | L | G | S | E | L | G | C | Y | T | I | N | R | Y | K | S | F | K | L | C | E | N | S | A | T | G | K | S | C | E | I | D | S | T | P | V | K | C | R | Q | G | F | C | L | K | I | T | Q | E | G | R | G | H | V | K | L | S | R |   |
| AAK52743.1 | L   | L | R | T | E | T | A | E | I | H | N   | D | N | Y | G | G | P | G | D | K | I   | T | I | C | N | G | S | T | V | D | Q   | R | L | G | S | E | L | G | C | Y | T | I | N | R | Y | N | S | F | N | L | C | E | N | A | T | A | T | G | K | S | C | E | I | D | S | T | P | V | K | C | R | Q | G | F | C | L | K | I | T | Q | E | G | R | G | H | V | K | L | S | R |
| AAW84284.1 | L   | S | R | T | E | T | A | E | I | H | S   | D | N | Y | G | G | P | G | D | K | I   | T | I | C | N | G | S | T | V | D | Q   | R | L | G | S | E | L | G | C | Y | T | I | N | R | Y | K | S | F | K | L | C | E | N | S | A | T | G | K | S | C | E | I | D | S | T | P | V | K | C | R | Q | G | F | C | L | K | I | T | Q | E | G | R | G | H | V | K | L | S | R |   |
| ABB30029.1 | L   | S | R | T | E | T | A | E | I | H | S   | D | N | Y | G | G | P | G | D | K | I   | T | I | C | N | G | S | T | V | D | Q   | R | L | G | S | E | L | G | C | Y | T | I | N | R | Y | K | S | F | K | L | C | E | N | S | A | T | G | K | S | C | E | I | D | S | T | P | V | K | C | R | Q | G | F | C | L | K | I | T | Q | E | G | R | G | H | V | K | L | S | R |   |
| AIE16128.1 | L   | L | R | T | E | T | A | E | I | H | S   | D | N | Y | G | G | P | G | D | K | I   | T | I | C | N | G | S | T | V | D | Q   | R | L | G | S | E | L | G | C | Y | T | I | N | R | Y | K | S | F | K | L | C | E | N | S | A | T | G | K | S | C | E | I | D | S | T | P | V | K | C | R | Q | G | F | C | L | K | I | T | Q | E | G | R | G | H | V | K | L | S | R |   |
| AIE16130.1 | L   | L | R | T | E | T | A | E | I | H | S   | D | N | Y | G | G | P | G | D | K | I   | T | I | C | N | G | S | T | V | D | Q   | R | L | G | S | E | L | G | C | Y | T | I | N | R | Y | K | S | F | K | L | C | E | N | S | A | T | G | K | S | C | E | I | D | S | T | P | V | K | C | R | Q | G | F | C | L | K | I | T | Q | E | G | R | G | H | V | K | L | S | R |   |
| AIE16129.1 | L   | L | R | T | E | T | A | E | I | H | S   | D | N | Y | G | G | P | G | D | K | I   | T | I | C | N | G | S | T | V | D | Q   | R | L | G | S | E | L | G | C | Y | T | I | N | R | Y | K | S | F | K | L | C | E | N | S | A | T | G | K | S | C | E | I | D | S | T | P | V | K | C | R | Q | G | F | C | L | K | I | T | Q | E | G | R | G | H | V | K | L | S | R |   |
| AIE16131.1 | L   | L | R | T | E | T | A | E | I | H | S   | D | N | Y | G | G | P | G | D | K | I   | T | I | C | N | G | S | T | V | D | Q   | R | L | G | S | E | L | G | C | Y | T | I | N | R | Y | K | S | F | K | L | C | E | N | S | A | T | G | K | S | C | E | I | D | S | T | P | V | K | C | R | Q | G | F | C | L | K | I | T | Q | E | G | R | G | H | V | K | L | S | R |   |
| AIE16133.1 | L   | L | R | T | E | T | A | E | I | H | S   | D | N | Y | G | G | P | G | D | K | I   | T | I | C | N | G | S | T | V | D | Q   | R | L | G | S | E | L | G | C | Y | T | I | N | R | Y | K | S | F | K | L | C | E | N | S | A | T | G | K | S | C | E | I | D | S | T | P | V | K | C | R | Q | G | F | C | L | K | I | T | Q | E | G | R | G | H | V | K | L | S | R |   |
| AIE16132.1 | L   | L | R | T | E | T | E | I | H | S | D   | N | Y | G | G | P | G | D | K | I | T   | I | C | N | G | S | T | V | D | Q | R   | L | G | S | E | L | G | C | Y | T | I | N | R | Y | K | S | F | K | L | C | E | N | S | A | T | G | K | S | C | E | I | D | S | T | P | V | K | C | R | Q | G | F | C | L | K | I | T | Q | E | G | R | G | H | V | K | L | S | R |   |   |
| ABB30032.1 | L   | L | R | T | E | T | A | E | I | H | G   | D | N | Y | G | G | P | G | D | K | I   | T | I | C | N | G | S | T | V | D | Q   | R | L | G | S | E | L | G | C | Y | T | I | N | R | Y | K | S | F | K | L | C | E | N | S | A | T | G | K | S | C | E | I | D | N | T | P | V | K | C | R | Q | G | F | C | L | K | I | T | Q | E | G | R | G | H | V | K | L | S | R |   |
| ABB30033.1 | L   | L | R | T | E | T | A | E | I | H | S   | D | N | Y | G | G | P | G | D | K | I   | T | I | C | N | G | S | T | V | D | Q   | R | L | G | S | E | L | G | C | Y | T | I | N | R | Y | K | S | F | K | L | C | E | N | S | A | T | G | K | S | C | E | I | D | S | T | P | V | K | C | R | Q | G | F | C | L | K | I | T | Q | E | G | R | G | H | V | K | L | S | R |   |
| AIE16134.1 | L   | L | R | T | E | T | A | E | I | H | S   | D | N | Y | G | G | P | G | D | K | I   | T | I | C | N | G | S | T | V | D | Q   | R | L | G | S | E | L | G | C | Y | T | I | N | R | Y | K | S | F | K | L | C | E | N | S | A | T | G | K | S | C | E | I | D | S | T | P | V | K | C | R | Q | G | F | C | L | K | I | T | Q | E | G | R | G | H | V | K | L | S | R |   |
| ABB30035.1 | L   | L | R | T | E | T | E | I | H | S | D   | N | Y | G | G | P | G | D | K | I | T   | I | C | N | G | S | T | V | D | Q | R   | L | G | S | E | L | G | C | Y | T | I | N | R | Y | K | S | F | K | L | C | E | N | S | A | T | G | K | S | C | E | I | D | S | T | P | V | K | C | R | Q | G | F | C | L | K | I | T | Q | E | G | R | G | H | V | K | L | S | R |   |   |
| AIE16135.1 | L   | L | R | T | E | T | E | I | H | S | D   | N | Y | G | G | P | G | D | K | I | T   | I | C | N | G | S | T | V | D | Q | R   | L | G | S | E | L | G | C | Y | T | I | N | R | Y | K | S | F | K | L | C | E | N | S | A | T | G | K | S | C | E | I | D | S | T | P | V | K | C | R | Q | G | F | C | L | K | I | T | Q | E | G | R | G | H | V | K | L | S | R |   |   |
| AAK52742.1 | L   | L | R | T | E | T | A | E | I | H | G   | D | N | Y | G | G | P | G | D | K | I   | T | I | C | N | G | S | T | V | D | Q   | R | L | G | S | E | L | G | C | Y | T | I | N | R | Y | K | S | F | K | L | C | E | N | S | A | T | G | K | S | C | E | I | D | N | T | P | V | K | C | R | Q | G | F | C | L | K | I | T | Q | E | G | R | G | H | V | K | L | S | R |   |
| BAB84572.1 | L   | L | R | T | E | T | A | E | I | H | G   | D | N | Y | G | G | P | G | D | K | I   | T | I | C | N | G | S | T | V | D | Q   | R | L | G | S | E | L | G | C | Y | T | I | N | R | Y | K | S | F | K | L | C | E | N | S | G | T | G | K | S | C | E | I | D | N | T | P | V | K | C | R | Q | G | F | C | L | K | I | T | Q | E | G | R | G | H | V | K | L | S | R |   |
| Consensus  | L   | L | R | T | E | T | A | E | I | H | S   | D | N | Y | G | G | P | G | D | K | I   | T | I | C | N | G | S | T | V | D | Q   | R | L | G | S | E | L | G | C | Y | T | I | N | R | Y | K | S | F | K | L | C | E | N | S | A | T | G | K | S | C | E | I | D | S | T | P | V | K | C | R | Q | G | F | C | L | K | I | T | Q | E | G | R | G | H | V | K | L | S | R |   |

|            | 740 |   |   |   |   |   |   |   |   |   | 760 |   |   |   |   |   |   |   |   |   | 780 |   |   |   |   |   |   |   |   |   | 800 |   |   |   |   |   |   |   |   |   |   |   |   |   |   |   |   |   |   |   |   |   |   |   |   |   |   |   |   |   |   |   |   |   |   |   |   |   |   |   |   |   |   |   |   |   |   |   |   |   |   |   |   |   |   |   |   |   |
|------------|-----|---|---|---|---|---|---|---|---|---|-----|---|---|---|---|---|---|---|---|---|-----|---|---|---|---|---|---|---|---|---|-----|---|---|---|---|---|---|---|---|---|---|---|---|---|---|---|---|---|---|---|---|---|---|---|---|---|---|---|---|---|---|---|---|---|---|---|---|---|---|---|---|---|---|---|---|---|---|---|---|---|---|---|---|---|---|---|---|---|
| AAM48107.1 | Y   | L | L | I | V | G | T | L | G | K | F   | K | Q | Y | R | E | L | K | P | Q | T   | C | T | I | C | E | T | T | P | N | A   | I | D | A | E | M | H | D | L | N | C | S | Y | N | I | C | P | Y | C | A | S | R | L | T | S | D | G | L | A | R | H | V | M | Q | C | P | K | R | K | E | K | I | E | E | T | E | L | Y | N | L | N | L | E | R | I | P | W |   |
| BAB84577.1 | Y   | L | L | I | V | G | T | L | G | K | F   | K | Q | Y | R | E | L | K | P | Q | T   | C | T | I | C | E | T | T | P | N | A   | I | D | A | E | M | H | D | L | N | C | S | Y | N | I | C | P | Y | C | A | S | R | L | T | S | D | G | L | A | R | H | V | M | Q | C | P | K | R | K | E | K | I | E | E | T | E | L | Y | N | L | N | L | E | R | I | P | W |   |
| BAB84578.1 | Y   | L | L | I | V | G | T | L | G | K | F   | K | Q | Y | R | E | L | K | P | Q | T   | C | T | I | C | E | T | T | P | N | A   | I | D | A | E | M | H | D | L | N | C | S | Y | N | I | C | P | Y | C | A | S | R | L | T | S | D | G | L | A | R | H | V | M | Q | C | P | K | R | K | E | K | I | E | E | T | E | L | Y | N | L | N | L | E | R | I | P | W |   |
| AAK18286.1 | Y   | L | L | I | V | G | T | L | G | K | F   | K | Q | Y | R | E | L | K | P | Q | T   | C | T | I | C | E | T | T | P | N | A   | I | D | A | E | M | H | D | L | N | C | S | Y | N | I | C | P | Y | C | A | S | R | L | T | S | D | G | L | A | R | H | V | M | Q | C | P | K | R | K | E | K | I | E | E | T | E | L | Y | N | L | N | L | E | R | I | P | W |   |
| AAK52743.1 | Y   | L | L | I | V | G | T | L | G | K | F   | K | Q | Y | R | E | L | K | P | Q | T   | C | T | I | C | E | T | T | P | N | A   | I | D | A | E | M | H | D | L | N | C | S | Y | N | I | C | P | Y | C | A | S | R | P | T | S | D | G | L | A | R | H | V | M | Q | C | P | K | R | K | E | K | I | E | E | T | E | L | Y | N | L | N | L | E | R | I | P | W |   |
| AAW82484.1 | Y   | L | L | I | V | G | T | L | G | K | F   | K | Q | Y | R | E | L | K | P | Q | T   | C | T | I | C | E | T | T | P | N | A   | I | D | A | E | M | H | D | L | N | C | S | Y | N | I | C | P | Y | C | A | S | R | L | T | S | D | G | L | A | R | H | V | M | Q | C | P | K | R | K | E | K | I | E | E | T | E | L | Y | N | L | N | L | E | R | I | P | W |   |
| ABB30029.1 | Y   | L | L | I | V | G | T | L | G | K | F   | K | Q | Y | R | E | L | K | P | Q | T   | C | T | I | C | E | T | T | P | N | A   | I | D | A | E | M | H | D | L | N | C | S | Y | N | I | C | P | Y | C | A | S | R | L | T | S | D | G | L | A | R | H | V | M | Q | C | P | K | R | K | E | K | I | E | E | T | E | L | Y | N | L | N | L | E | R | I | P | W |   |
| AIE16128.1 | Y   | L | L | I | V | G | T | L | G | K | F   | K | Q | Y | R | E | L | K | P | Q | T   | C | T | I | C | E | T | N | P | N | A   | I | D | A | E | M | H | D | L | N | C | S | Y | N | I | C | P | Y | C | A | S | R | L | T | S | D | G | L | A | R | H | V | M | Q | C | P | K | R | K | E | K | I | E | E | T | E | L | Y | N | L | N | L | E | R | I | P | W |   |
| AIE16130.1 | Y   | L | L | I | V | G | T | L | G | K | F   | K | Q | Y | R | E | L | K | P | Q | T   | C | T | I | C | E | T | N | P | N | A   | I | D | A | E | M | H | D | L | N | C | S | Y | N | I | C | P | Y | C | A | S | R | L | T | S | D | G | L | A | R | H | V | M | Q | C | P | K | R | K | E | K | I | E | E | T | E | L | Y | N | L | N | L | E | R | I | P | W |   |
| AIE16129.1 | Y   | L | L | I | V | G | T | L | G | K | F   | K | Q | Y | R | E | L | K | P | Q | T   | C | T | I | C | E | T | N | P | N | A   | I | D | A | E | M | H | D | L | N | C | S | Y | N | I | C | P | Y | C | A | S | R | L | T | S | D | G | L | A | R | H | V | M | Q | C | P | K | R | K | E | K | I | E | E | T | E | L | Y | N | L | N | L | E | R | I | P | W |   |
| AIE16131.1 | Y   | L | L | I | V | G | T | L | G | K | F   | K | Q | Y | R | E | L | K | P | Q | T   | C | T | I | C | E | T | N | P | N | A   | I | D | A | E | M | H | D | L | N | C | S | Y | N | I | C | P | Y | C | A | S | R | L | T | S | D | G | L | A | R | H | V | M | Q | C | P | K | R | K | E | K | I | E | E | T | E | L | Y | N | L | N | L | E | R | I | P | W |   |
| AIE16133.1 | Y   | L | L | I | V | G | T | L | G | K | F   | K | Q | Y | R | E | L | K | P | Q | T   | C | T | I | C | E | T | N | P | N | A   | I | D | A | E | M | H | D | L | N | C | S | Y | N | I | C | P | Y | C | A | S | R | L | T | S | D | G | L | A | R | H | V | M | Q | C | P | K | R | K | E | K | I | E | E | T | E | L | Y | N | L | N | L | E | R | I | P | W |   |
| AIE16132.1 | Y   | L | L | I | V | G | T | L | G | K | F   | K | Q | Y | R | E | L | K | P | Q | T   | C | T | I | C | E | T | N | P | N | A   | I | D | A | E | M | H | D | L | N | C | S | Y | N | I | C | P | Y | C | A | S | R | L | T | S | D | G | L | A | R | H | V | M | Q | C | P | K | R | K | E | K | I | E | E | T | E | L | Y | N | L | N | L | E | R | I | P | W |   |
| ABB30032.1 | Y   | L | L | I | V | G | T | L | G | K | F   | K | Q | Y | R | E | L | K | P | Q | T   | C | T | I | C | E | T | N | P | N | A   | I | D | A | E | M | H | D | L | N | C | S | Y | N | I | C | P | Y | C | A | S | R | L | T | S | D | G | L | A | R | H | V | M | Q | C | P | K | R | K | E | K | I | E | E | T | E | L | Y | N | L | N | L | E | R | I | P | W |   |
| ABB30033.1 | Y   | L | L | I | V | A | G | T | V | K | F   | K | Q | Y | R | E | L | R | P | Q | T   | C | T | I | C | E | T | T | P | N | A   | I | D | A | E | M | H | D | L | N | C | S | Y | N | I | C | P | Y | C | A | S | R | L | T | S | D | G | L | A | R | H | V | M | Q | C | P | K | R | K | E | K | I | E | E | T | E | L | Y | N | L | N | L | E | R | I | P | W |   |
| AIE16134.1 | Y   | L | L | I | V | A | G | T | V | K | F   | K | Q | Y | R | E | L | R | P | Q | T   | C | T | I | C | E | T | T | P | N | A   | I | D | A | E | M | H | D | L | N | C | S | Y | N | I | C | P | Y | C | A | S | R | L | T | S | D | G | L | A | R | H | V | M | Q | C | P | K | R | K | E | K | I | E | E | T | E | L | Y | N | L | N | L | E | R | I | P | W |   |
| ABB30035.1 | Y   | L | L | I | V | A | G | T | V | K | F   | K | Q | Y | R | E | L | R | P | Q | T   | C | T | I | C | E | T | T | P | N | A   | I | D | A | E | M | H | D | L | N | C | S | Y | N | I | C | P | Y | C | A | S | R | L | T | S | D | G | L | A | R | H | V | M | Q | C | P | K | R | K | E | K | I | E | E | T | E | L | Y | N | L | N | L | E | R | I | P | W |   |
| AIE16135.1 | Y   | L | L | I | V | A | G | T | V | K | F   | K | Q | Y | R | E | L | R | P | Q | T   | C | T | I | C | E | T | T | P | N | A   | I | D | A | E | M | H | D | L | N | C | S | Y | N | I | C | P | Y | C | A | S | R | L | T | S | D | G | L | A | R | H | V | M | Q | C | P | K | R | K | E | K | I | E | E | T | E | L | Y | N | L | N | L | E | R | I | P | W |   |
| AAK52742.1 | Y   | L | L | I | V | G | T | L | G | K | F   | K | Q | Y | R | E | L | K | P | Q | T   | C | T | I | C | E | T | T | P | N | A   | I | D | A | E | M | H | D | L | N | C | S | Y | N | I | C | P | Y | C | A | S | R | L | T | S | D | G | L | A | R | H | V | T | Q | C | P | K | R | K | E | K | I | E | E | T | E | L | Y | N | L | N | L | E | R | I | P | W |   |
| BAB84572.1 | Y   | L | L | I | V | G | T | L | G | K | F   | K | Q | Y | R | E | L | K | P | Q | T   | C | T | I | C | E | T | T | P | N | A   | I | D | A | E | M | H | D | L | N | C | S | Y | N | I | C | P | Y | C | A | S | R | L | T | S | D | G | L | A | R | H | V | T | Q | C | P | K | R | K | E | K | I | E | E | T | E | L | Y | N | L | N | L | E | R | I | P | W |   |
| Consensus  | Y   | L | L | I | V | V | G | T | L | G | K   | F | K | Q | Y | R | E | L | K | P | Q   | T | C | T | I | C | E | T | T | P | N   | A | I | D | A | E | M | H | D | L | N | C | S | Y | N | I | C | P | Y | C | A | S | R | L | T | S | D | G | L | A | R | H | V | M | Q | C | P | K | R | K | E | K | I | E | E | T | E | L | Y | N | L | N | L | E | R | I | P | W |













**B.** GP1 protein sequence alignment between the Congo virus Asia-1 genotype retrieved from NCBI with accession numbers AAM48107, AAK52742, BAB84572, AIE16134, ABB30033, AIE16135, ABB30035, ABB30032, AIE16129, AIE1612B8, AIE16130, AIE16131, AIE16133, AIE16132, AAW84284, AAK52743, ABB30029, BA84577, AF338470 and BAB84578

|              |     |     |     |     |     |   |   |   |   |    |    |    |    |   |   |   |   |   |   |   |   |   |   |   |   |   |   |   |   |   |   |   |   |   |   |   |   |   |   |   |   |   |   |   |   |   |   |   |   |   |   |   |   |   |   |   |   |   |   |   |   |   |   |   |   |   |   |   |   |   |   |   |   |   |   |   |   |   |   |   |   |   |   |   |   |   |   |   |  |  |  |  |  |  |  |  |  |  |  |  |  |  |  |  |  |  |  |  |  |  |  |  |  |  |  |  |  |  |  |  |  |  |  |  |  |  |  |  |  |  |  |  |  |  |  |  |  |  |  |  |  |  |  |  |  |  |  |  |  |  |  |  |  |  |  |  |  |  |  |  |  |  |  |  |  |  |  |  |  |  |  |  |  |  |  |  |  |  |  |  |  |  |  |  |  |  |  |  |  |  |  |  |  |  |  |  |  |  |  |  |  |  |  |  |  |  |  |  |  |  |  |  |  |  |  |  |  |  |  |  |  |  |  |  |  |  |  |  |  |  |  |  |  |  |  |  |  |  |  |  |  |  |  |  |  |  |  |  |  |  |  |  |  |  |  |  |  |  |  |  |  |  |  |  |  |  |  |  |  |  |  |  |  |  |  |  |  |  |  |  |  |  |  |  |  |  |  |  |  |  |  |  |  |  |  |  |  |  |  |  |  |  |  |  |  |  |  |  |  |  |  |  |  |  |  |  |  |  |  |  |  |  |  |  |  |  |  |  |  |  |  |  |  |  |  |  |  |  |  |  |  |  |  |  |  |  |  |  |  |  |  |  |  |  |  |  |  |  |  |  |  |  |  |  |  |  |  |  |  |  |  |  |  |  |  |  |  |  |  |  |  |  |  |  |  |  |  |  |  |  |  |  |  |  |  |  |  |  |  |  |  |  |  |  |  |  |  |  |  |  |  |  |  |  |  |  |  |  |  |  |  |  |  |  |  |  |  |  |  |  |  |  |  |  |  |  |  |  |  |  |  |  |  |  |  |  |  |  |  |  |  |  |  |  |  |  |  |  |  |  |  |  |  |  |  |  |  |  |  |  |  |  |  |  |  |  |  |  |  |  |  |  |  |  |  |  |  |  |  |  |  |  |  |  |  |  |  |  |  |  |  |  |  |  |  |  |  |  |  |  |  |  |  |  |  |  |  |  |  |  |  |  |  |  |  |  |  |  |  |  |  |  |  |  |  |  |  |  |  |  |  |  |  |  |  |  |  |  |  |  |  |  |  |  |  |  |  |  |  |  |  |  |  |  |  |  |  |  |  |  |  |  |  |  |  |  |  |  |  |  |  |  |  |  |  |  |  |  |  |  |  |  |  |  |  |  |  |  |  |  |  |  |  |  |  |  |  |  |  |  |  |  |  |  |  |  |  |  |  |  |  |  |  |  |  |  |  |  |  |  |  |  |  |  |  |  |  |  |  |  |  |  |  |  |  |  |  |  |  |  |  |  |  |  |  |  |  |  |  |  |  |  |  |  |  |  |  |  |  |  |
|--------------|-----|-----|-----|-----|-----|---|---|---|---|----|----|----|----|---|---|---|---|---|---|---|---|---|---|---|---|---|---|---|---|---|---|---|---|---|---|---|---|---|---|---|---|---|---|---|---|---|---|---|---|---|---|---|---|---|---|---|---|---|---|---|---|---|---|---|---|---|---|---|---|---|---|---|---|---|---|---|---|---|---|---|---|---|---|---|---|---|---|---|--|--|--|--|--|--|--|--|--|--|--|--|--|--|--|--|--|--|--|--|--|--|--|--|--|--|--|--|--|--|--|--|--|--|--|--|--|--|--|--|--|--|--|--|--|--|--|--|--|--|--|--|--|--|--|--|--|--|--|--|--|--|--|--|--|--|--|--|--|--|--|--|--|--|--|--|--|--|--|--|--|--|--|--|--|--|--|--|--|--|--|--|--|--|--|--|--|--|--|--|--|--|--|--|--|--|--|--|--|--|--|--|--|--|--|--|--|--|--|--|--|--|--|--|--|--|--|--|--|--|--|--|--|--|--|--|--|--|--|--|--|--|--|--|--|--|--|--|--|--|--|--|--|--|--|--|--|--|--|--|--|--|--|--|--|--|--|--|--|--|--|--|--|--|--|--|--|--|--|--|--|--|--|--|--|--|--|--|--|--|--|--|--|--|--|--|--|--|--|--|--|--|--|--|--|--|--|--|--|--|--|--|--|--|--|--|--|--|--|--|--|--|--|--|--|--|--|--|--|--|--|--|--|--|--|--|--|--|--|--|--|--|--|--|--|--|--|--|--|--|--|--|--|--|--|--|--|--|--|--|--|--|--|--|--|--|--|--|--|--|--|--|--|--|--|--|--|--|--|--|--|--|--|--|--|--|--|--|--|--|--|--|--|--|--|--|--|--|--|--|--|--|--|--|--|--|--|--|--|--|--|--|--|--|--|--|--|--|--|--|--|--|--|--|--|--|--|--|--|--|--|--|--|--|--|--|--|--|--|--|--|--|--|--|--|--|--|--|--|--|--|--|--|--|--|--|--|--|--|--|--|--|--|--|--|--|--|--|--|--|--|--|--|--|--|--|--|--|--|--|--|--|--|--|--|--|--|--|--|--|--|--|--|--|--|--|--|--|--|--|--|--|--|--|--|--|--|--|--|--|--|--|--|--|--|--|--|--|--|--|--|--|--|--|--|--|--|--|--|--|--|--|--|--|--|--|--|--|--|--|--|--|--|--|--|--|--|--|--|--|--|--|--|--|--|--|--|--|--|--|--|--|--|--|--|--|--|--|--|--|--|--|--|--|--|--|--|--|--|--|--|--|--|--|--|--|--|--|--|--|--|--|--|--|--|--|--|--|--|--|--|--|--|--|--|--|--|--|--|--|--|--|--|--|--|--|--|--|--|--|--|--|--|--|--|--|--|--|--|--|--|--|--|--|--|--|--|--|--|--|--|--|--|--|--|--|--|--|--|--|--|--|--|--|--|--|--|--|--|--|--|--|--|--|--|--|--|--|--|--|--|--|--|--|--|--|--|--|--|--|--|--|
| and BAB84578 |     |     |     |     |     |   |   |   |   | 20 | 40 | 60 | 80 |   |   |   |   |   |   |   |   |   |   |   |   |   |   |   |   |   |   |   |   |   |   |   |   |   |   |   |   |   |   |   |   |   |   |   |   |   |   |   |   |   |   |   |   |   |   |   |   |   |   |   |   |   |   |   |   |   |   |   |   |   |   |   |   |   |   |   |   |   |   |   |   |   |   |   |  |  |  |  |  |  |  |  |  |  |  |  |  |  |  |  |  |  |  |  |  |  |  |  |  |  |  |  |  |  |  |  |  |  |  |  |  |  |  |  |  |  |  |  |  |  |  |  |  |  |  |  |  |  |  |  |  |  |  |  |  |  |  |  |  |  |  |  |  |  |  |  |  |  |  |  |  |  |  |  |  |  |  |  |  |  |  |  |  |  |  |  |  |  |  |  |  |  |  |  |  |  |  |  |  |  |  |  |  |  |  |  |  |  |  |  |  |  |  |  |  |  |  |  |  |  |  |  |  |  |  |  |  |  |  |  |  |  |  |  |  |  |  |  |  |  |  |  |  |  |  |  |  |  |  |  |  |  |  |  |  |  |  |  |  |  |  |  |  |  |  |  |  |  |  |  |  |  |  |  |  |  |  |  |  |  |  |  |  |  |  |  |  |  |  |  |  |  |  |  |  |  |  |  |  |  |  |  |  |  |  |  |  |  |  |  |  |  |  |  |  |  |  |  |  |  |  |  |  |  |  |  |  |  |  |  |  |  |  |  |  |  |  |  |  |  |  |  |  |  |  |  |  |  |  |  |  |  |  |  |  |  |  |  |  |  |  |  |  |  |  |  |  |  |  |  |  |  |  |  |  |  |  |  |  |  |  |  |  |  |  |  |  |  |  |  |  |  |  |  |  |  |  |  |  |  |  |  |  |  |  |  |  |  |  |  |  |  |  |  |  |  |  |  |  |  |  |  |  |  |  |  |  |  |  |  |  |  |  |  |  |  |  |  |  |  |  |  |  |  |  |  |  |  |  |  |  |  |  |  |  |  |  |  |  |  |  |  |  |  |  |  |  |  |  |  |  |  |  |  |  |  |  |  |  |  |  |  |  |  |  |  |  |  |  |  |  |  |  |  |  |  |  |  |  |  |  |  |  |  |  |  |  |  |  |  |  |  |  |  |  |  |  |  |  |  |  |  |  |  |  |  |  |  |  |  |  |  |  |  |  |  |  |  |  |  |  |  |  |  |  |  |  |  |  |  |  |  |  |  |  |  |  |  |  |  |  |  |  |  |  |  |  |  |  |  |  |  |  |  |  |  |  |  |  |  |  |  |  |  |  |  |  |  |  |  |  |  |  |  |  |  |  |  |  |  |  |  |  |  |  |  |  |  |  |  |  |  |  |  |  |  |  |  |  |  |  |  |  |  |  |  |  |  |  |  |  |  |  |  |  |  |  |  |  |  |  |  |  |  |  |  |  |  |  |  |  |  |  |  |  |  |  |  |  |  |  |  |  |  |  |  |  |  |  |  |  |  |  |  |  |  |
| AAM48107.1   | P   | T   | N   | R   | S   | K | R | N | L | E  | M  | E  | I  | L | T | L | S | Q | G | L | K | K | Y | Y | G | K | I | L | K | L | D | L | T | L | E | E | D | T | E | G | L | E | W | C | K | R | N | L | G | L | V | C | D | D | N | F | F | Q | K | R | I | E | E | F | F | L | T | G | E | G | H | F | N | E | V | L | Q | F | K | T | P | S | T | L | S | P | T |   |  |  |  |  |  |  |  |  |  |  |  |  |  |  |  |  |  |  |  |  |  |  |  |  |  |  |  |  |  |  |  |  |  |  |  |  |  |  |  |  |  |  |  |  |  |  |  |  |  |  |  |  |  |  |  |  |  |  |  |  |  |  |  |  |  |  |  |  |  |  |  |  |  |  |  |  |  |  |  |  |  |  |  |  |  |  |  |  |  |  |  |  |  |  |  |  |  |  |  |  |  |  |  |  |  |  |  |  |  |  |  |  |  |  |  |  |  |  |  |  |  |  |  |  |  |  |  |  |  |  |  |  |  |  |  |  |  |  |  |  |  |  |  |  |  |  |  |  |  |  |  |  |  |  |  |  |  |  |  |  |  |  |  |  |  |  |  |  |  |  |  |  |  |  |  |  |  |  |  |  |  |  |  |  |  |  |  |  |  |  |  |  |  |  |  |  |  |  |  |  |  |  |  |  |  |  |  |  |  |  |  |  |  |  |  |  |  |  |  |  |  |  |  |  |  |  |  |  |  |  |  |  |  |  |  |  |  |  |  |  |  |  |  |  |  |  |  |  |  |  |  |  |  |  |  |  |  |  |  |  |  |  |  |  |  |  |  |  |  |  |  |  |  |  |  |  |  |  |  |  |  |  |  |  |  |  |  |  |  |  |  |  |  |  |  |  |  |  |  |  |  |  |  |  |  |  |  |  |  |  |  |  |  |  |  |  |  |  |  |  |  |  |  |  |  |  |  |  |  |  |  |  |  |  |  |  |  |  |  |  |  |  |  |  |  |  |  |  |  |  |  |  |  |  |  |  |  |  |  |  |  |  |  |  |  |  |  |  |  |  |  |  |  |  |  |  |  |  |  |  |  |  |  |  |  |  |  |  |  |  |  |  |  |  |  |  |  |  |  |  |  |  |  |  |  |  |  |  |  |  |  |  |  |  |  |  |  |  |  |  |  |  |  |  |  |  |  |  |  |  |  |  |  |  |  |  |  |  |  |  |  |  |  |  |  |  |  |  |  |  |  |  |  |  |  |  |  |  |  |  |  |  |  |  |  |  |  |  |  |  |  |  |  |  |  |  |  |  |  |  |  |  |  |  |  |  |  |  |  |  |  |  |  |  |  |  |  |  |  |  |  |  |  |  |  |  |  |  |  |  |  |  |  |  |  |  |  |  |  |  |  |  |  |  |  |  |  |  |  |  |  |  |  |  |  |  |  |  |  |  |  |  |  |  |  |  |  |  |  |  |  |  |  |  |  |  |  |  |  |  |  |  |  |  |  |  |  |  |  |  |  |  |  |  |  |  |  |  |  |  |  |  |
| BAB84577.1   | P   | T   | G   | R   | S   | K | R | N | L | E  | M  | E  | I  | L | T | L | S | Q | G | L | K | K | Y | Y | G | K | I | L | K | L | D | L | T | L | E | E | D | T | E | G | L | E | W | C | K | R | N | L | G | L | V | C | D | D | N | F | F | Q | K | R | I | E | E | F | F | L | T | G | K | G | H | F | N | E | V | L | Q | F | K | T | P | S | T | L | S | P | T |   |  |  |  |  |  |  |  |  |  |  |  |  |  |  |  |  |  |  |  |  |  |  |  |  |  |  |  |  |  |  |  |  |  |  |  |  |  |  |  |  |  |  |  |  |  |  |  |  |  |  |  |  |  |  |  |  |  |  |  |  |  |  |  |  |  |  |  |  |  |  |  |  |  |  |  |  |  |  |  |  |  |  |  |  |  |  |  |  |  |  |  |  |  |  |  |  |  |  |  |  |  |  |  |  |  |  |  |  |  |  |  |  |  |  |  |  |  |  |  |  |  |  |  |  |  |  |  |  |  |  |  |  |  |  |  |  |  |  |  |  |  |  |  |  |  |  |  |  |  |  |  |  |  |  |  |  |  |  |  |  |  |  |  |  |  |  |  |  |  |  |  |  |  |  |  |  |  |  |  |  |  |  |  |  |  |  |  |  |  |  |  |  |  |  |  |  |  |  |  |  |  |  |  |  |  |  |  |  |  |  |  |  |  |  |  |  |  |  |  |  |  |  |  |  |  |  |  |  |  |  |  |  |  |  |  |  |  |  |  |  |  |  |  |  |  |  |  |  |  |  |  |  |  |  |  |  |  |  |  |  |  |  |  |  |  |  |  |  |  |  |  |  |  |  |  |  |  |  |  |  |  |  |  |  |  |  |  |  |  |  |  |  |  |  |  |  |  |  |  |  |  |  |  |  |  |  |  |  |  |  |  |  |  |  |  |  |  |  |  |  |  |  |  |  |  |  |  |  |  |  |  |  |  |  |  |  |  |  |  |  |  |  |  |  |  |  |  |  |  |  |  |  |  |  |  |  |  |  |  |  |  |  |  |  |  |  |  |  |  |  |  |  |  |  |  |  |  |  |  |  |  |  |  |  |  |  |  |  |  |  |  |  |  |  |  |  |  |  |  |  |  |  |  |  |  |  |  |  |  |  |  |  |  |  |  |  |  |  |  |  |  |  |  |  |  |  |  |  |  |  |  |  |  |  |  |  |  |  |  |  |  |  |  |  |  |  |  |  |  |  |  |  |  |  |  |  |  |  |  |  |  |  |  |  |  |  |  |  |  |  |  |  |  |  |  |  |  |  |  |  |  |  |  |  |  |  |  |  |  |  |  |  |  |  |  |  |  |  |  |  |  |  |  |  |  |  |  |  |  |  |  |  |  |  |  |  |  |  |  |  |  |  |  |  |  |  |  |  |  |  |  |  |  |  |  |  |  |  |  |  |  |  |  |  |  |  |  |  |  |  |  |  |  |  |  |  |  |  |  |  |  |  |  |  |  |  |  |  |  |  |  |  |  |  |  |  |  |  |  |  |  |  |
| BAB84578.1   | P   | T   | G   | R   | S   | K | R | N | L | E  | M  | E  | I  | L | T | L | S | Q | G | L | K | K | Y | Y | G | K | I | L | K | L | D | L | T | L | E | E | D | T | E | G | L | E | W | C | K | R | N | L | G | L | V | C | D | D | N | F | F | Q | K | R | I | E | E | F | F | L | T | G | K | G | H | F | N | E | V | L | Q | F | K | T | P | S | T | L | S | P | T |   |  |  |  |  |  |  |  |  |  |  |  |  |  |  |  |  |  |  |  |  |  |  |  |  |  |  |  |  |  |  |  |  |  |  |  |  |  |  |  |  |  |  |  |  |  |  |  |  |  |  |  |  |  |  |  |  |  |  |  |  |  |  |  |  |  |  |  |  |  |  |  |  |  |  |  |  |  |  |  |  |  |  |  |  |  |  |  |  |  |  |  |  |  |  |  |  |  |  |  |  |  |  |  |  |  |  |  |  |  |  |  |  |  |  |  |  |  |  |  |  |  |  |  |  |  |  |  |  |  |  |  |  |  |  |  |  |  |  |  |  |  |  |  |  |  |  |  |  |  |  |  |  |  |  |  |  |  |  |  |  |  |  |  |  |  |  |  |  |  |  |  |  |  |  |  |  |  |  |  |  |  |  |  |  |  |  |  |  |  |  |  |  |  |  |  |  |  |  |  |  |  |  |  |  |  |  |  |  |  |  |  |  |  |  |  |  |  |  |  |  |  |  |  |  |  |  |  |  |  |  |  |  |  |  |  |  |  |  |  |  |  |  |  |  |  |  |  |  |  |  |  |  |  |  |  |  |  |  |  |  |  |  |  |  |  |  |  |  |  |  |  |  |  |  |  |  |  |  |  |  |  |  |  |  |  |  |  |  |  |  |  |  |  |  |  |  |  |  |  |  |  |  |  |  |  |  |  |  |  |  |  |  |  |  |  |  |  |  |  |  |  |  |  |  |  |  |  |  |  |  |  |  |  |  |  |  |  |  |  |  |  |  |  |  |  |  |  |  |  |  |  |  |  |  |  |  |  |  |  |  |  |  |  |  |  |  |  |  |  |  |  |  |  |  |  |  |  |  |  |  |  |  |  |  |  |  |  |  |  |  |  |  |  |  |  |  |  |  |  |  |  |  |  |  |  |  |  |  |  |  |  |  |  |  |  |  |  |  |  |  |  |  |  |  |  |  |  |  |  |  |  |  |  |  |  |  |  |  |  |  |  |  |  |  |  |  |  |  |  |  |  |  |  |  |  |  |  |  |  |  |  |  |  |  |  |  |  |  |  |  |  |  |  |  |  |  |  |  |  |  |  |  |  |  |  |  |  |  |  |  |  |  |  |  |  |  |  |  |  |  |  |  |  |  |  |  |  |  |  |  |  |  |  |  |  |  |  |  |  |  |  |  |  |  |  |  |  |  |  |  |  |  |  |  |  |  |  |  |  |  |  |  |  |  |  |  |  |  |  |  |  |  |  |  |  |  |  |  |  |  |  |  |  |  |  |  |  |  |  |  |  |  |  |  |  |  |  |  |  |  |  |  |
| AAK18286.1   | P   | T   | G   | R   | S   | K | R | N | L | E  | M  | E  | I  | L | T | L | S | Q | G | L | K | K | Y | Y | G | K | I | L | K | L | D | L | T | L | E | E | D | T | E | G | L | E | W | C | K | R | N | L | G | L | V | C | D | D | N | F | F | Q | K | R | I | E | E | F | F | L | T | G | K | G | H | F | N | E | V | L | Q | F | K | T | P | S | T | L | S | P | T |   |  |  |  |  |  |  |  |  |  |  |  |  |  |  |  |  |  |  |  |  |  |  |  |  |  |  |  |  |  |  |  |  |  |  |  |  |  |  |  |  |  |  |  |  |  |  |  |  |  |  |  |  |  |  |  |  |  |  |  |  |  |  |  |  |  |  |  |  |  |  |  |  |  |  |  |  |  |  |  |  |  |  |  |  |  |  |  |  |  |  |  |  |  |  |  |  |  |  |  |  |  |  |  |  |  |  |  |  |  |  |  |  |  |  |  |  |  |  |  |  |  |  |  |  |  |  |  |  |  |  |  |  |  |  |  |  |  |  |  |  |  |  |  |  |  |  |  |  |  |  |  |  |  |  |  |  |  |  |  |  |  |  |  |  |  |  |  |  |  |  |  |  |  |  |  |  |  |  |  |  |  |  |  |  |  |  |  |  |  |  |  |  |  |  |  |  |  |  |  |  |  |  |  |  |  |  |  |  |  |  |  |  |  |  |  |  |  |  |  |  |  |  |  |  |  |  |  |  |  |  |  |  |  |  |  |  |  |  |  |  |  |  |  |  |  |  |  |  |  |  |  |  |  |  |  |  |  |  |  |  |  |  |  |  |  |  |  |  |  |  |  |  |  |  |  |  |  |  |  |  |  |  |  |  |  |  |  |  |  |  |  |  |  |  |  |  |  |  |  |  |  |  |  |  |  |  |  |  |  |  |  |  |  |  |  |  |  |  |  |  |  |  |  |  |  |  |  |  |  |  |  |  |  |  |  |  |  |  |  |  |  |  |  |  |  |  |  |  |  |  |  |  |  |  |  |  |  |  |  |  |  |  |  |  |  |  |  |  |  |  |  |  |  |  |  |  |  |  |  |  |  |  |  |  |  |  |  |  |  |  |  |  |  |  |  |  |  |  |  |  |  |  |  |  |  |  |  |  |  |  |  |  |  |  |  |  |  |  |  |  |  |  |  |  |  |  |  |  |  |  |  |  |  |  |  |  |  |  |  |  |  |  |  |  |  |  |  |  |  |  |  |  |  |  |  |  |  |  |  |  |  |  |  |  |  |  |  |  |  |  |  |  |  |  |  |  |  |  |  |  |  |  |  |  |  |  |  |  |  |  |  |  |  |  |  |  |  |  |  |  |  |  |  |  |  |  |  |  |  |  |  |  |  |  |  |  |  |  |  |  |  |  |  |  |  |  |  |  |  |  |  |  |  |  |  |  |  |  |  |  |  |  |  |  |  |  |  |  |  |  |  |  |  |  |  |  |  |  |  |  |  |  |  |  |  |  |  |  |  |  |  |  |  |  |  |  |  |  |  |  |  |  |
| AAK52743.1   | P   | T   | G   | R   | S   | K | R | N | L | E  | M  | E  | I  | L | T | L | S | Q | G | L | K | K | Y | Y | G | K | I | L | K | L | D | L | T | L | E | E | D | T | E | G | L | E | W | C | K | R | N | L | G | L | V | C | D | D | N | F | F | Q | K | R | I | E | E | F | F | L | T | G | K | G | H | F | N | E | V | L | Q | F | K | T | P | S | T | L | S | P | T |   |  |  |  |  |  |  |  |  |  |  |  |  |  |  |  |  |  |  |  |  |  |  |  |  |  |  |  |  |  |  |  |  |  |  |  |  |  |  |  |  |  |  |  |  |  |  |  |  |  |  |  |  |  |  |  |  |  |  |  |  |  |  |  |  |  |  |  |  |  |  |  |  |  |  |  |  |  |  |  |  |  |  |  |  |  |  |  |  |  |  |  |  |  |  |  |  |  |  |  |  |  |  |  |  |  |  |  |  |  |  |  |  |  |  |  |  |  |  |  |  |  |  |  |  |  |  |  |  |  |  |  |  |  |  |  |  |  |  |  |  |  |  |  |  |  |  |  |  |  |  |  |  |  |  |  |  |  |  |  |  |  |  |  |  |  |  |  |  |  |  |  |  |  |  |  |  |  |  |  |  |  |  |  |  |  |  |  |  |  |  |  |  |  |  |  |  |  |  |  |  |  |  |  |  |  |  |  |  |  |  |  |  |  |  |  |  |  |  |  |  |  |  |  |  |  |  |  |  |  |  |  |  |  |  |  |  |  |  |  |  |  |  |  |  |  |  |  |  |  |  |  |  |  |  |  |  |  |  |  |  |  |  |  |  |  |  |  |  |  |  |  |  |  |  |  |  |  |  |  |  |  |  |  |  |  |  |  |  |  |  |  |  |  |  |  |  |  |  |  |  |  |  |  |  |  |  |  |  |  |  |  |  |  |  |  |  |  |  |  |  |  |  |  |  |  |  |  |  |  |  |  |  |  |  |  |  |  |  |  |  |  |  |  |  |  |  |  |  |  |  |  |  |  |  |  |  |  |  |  |  |  |  |  |  |  |  |  |  |  |  |  |  |  |  |  |  |  |  |  |  |  |  |  |  |  |  |  |  |  |  |  |  |  |  |  |  |  |  |  |  |  |  |  |  |  |  |  |  |  |  |  |  |  |  |  |  |  |  |  |  |  |  |  |  |  |  |  |  |  |  |  |  |  |  |  |  |  |  |  |  |  |  |  |  |  |  |  |  |  |  |  |  |  |  |  |  |  |  |  |  |  |  |  |  |  |  |  |  |  |  |  |  |  |  |  |  |  |  |  |  |  |  |  |  |  |  |  |  |  |  |  |  |  |  |  |  |  |  |  |  |  |  |  |  |  |  |  |  |  |  |  |  |  |  |  |  |  |  |  |  |  |  |  |  |  |  |  |  |  |  |  |  |  |  |  |  |  |  |  |  |  |  |  |  |  |  |  |  |  |  |  |  |  |  |  |  |  |  |  |  |  |  |  |  |  |  |  |  |  |  |  |  |  |  |  |  |  |  |  |  |  |  |
| AAW84284.1   | P   | T   | S   | R   | S   | K | R | N | L | E  | M  | E  | I  | L | T | L | S | Q | G | L | K | K | Y | Y | G | K | I | L | K | L | D | L | T | L | E | E | D | T | E | G | L | E | W | C | K | R | N | L | G | L | V | C | D | A | D | F | F | Q | K | R | I | E | E | F | F | L | T | G | E | G | H | F | N | E | V | L | Q | F | K | T | P | S | T | L | S | P | T |   |  |  |  |  |  |  |  |  |  |  |  |  |  |  |  |  |  |  |  |  |  |  |  |  |  |  |  |  |  |  |  |  |  |  |  |  |  |  |  |  |  |  |  |  |  |  |  |  |  |  |  |  |  |  |  |  |  |  |  |  |  |  |  |  |  |  |  |  |  |  |  |  |  |  |  |  |  |  |  |  |  |  |  |  |  |  |  |  |  |  |  |  |  |  |  |  |  |  |  |  |  |  |  |  |  |  |  |  |  |  |  |  |  |  |  |  |  |  |  |  |  |  |  |  |  |  |  |  |  |  |  |  |  |  |  |  |  |  |  |  |  |  |  |  |  |  |  |  |  |  |  |  |  |  |  |  |  |  |  |  |  |  |  |  |  |  |  |  |  |  |  |  |  |  |  |  |  |  |  |  |  |  |  |  |  |  |  |  |  |  |  |  |  |  |  |  |  |  |  |  |  |  |  |  |  |  |  |  |  |  |  |  |  |  |  |  |  |  |  |  |  |  |  |  |  |  |  |  |  |  |  |  |  |  |  |  |  |  |  |  |  |  |  |  |  |  |  |  |  |  |  |  |  |  |  |  |  |  |  |  |  |  |  |  |  |  |  |  |  |  |  |  |  |  |  |  |  |  |  |  |  |  |  |  |  |  |  |  |  |  |  |  |  |  |  |  |  |  |  |  |  |  |  |  |  |  |  |  |  |  |  |  |  |  |  |  |  |  |  |  |  |  |  |  |  |  |  |  |  |  |  |  |  |  |  |  |  |  |  |  |  |  |  |  |  |  |  |  |  |  |  |  |  |  |  |  |  |  |  |  |  |  |  |  |  |  |  |  |  |  |  |  |  |  |  |  |  |  |  |  |  |  |  |  |  |  |  |  |  |  |  |  |  |  |  |  |  |  |  |  |  |  |  |  |  |  |  |  |  |  |  |  |  |  |  |  |  |  |  |  |  |  |  |  |  |  |  |  |  |  |  |  |  |  |  |  |  |  |  |  |  |  |  |  |  |  |  |  |  |  |  |  |  |  |  |  |  |  |  |  |  |  |  |  |  |  |  |  |  |  |  |  |  |  |  |  |  |  |  |  |  |  |  |  |  |  |  |  |  |  |  |  |  |  |  |  |  |  |  |  |  |  |  |  |  |  |  |  |  |  |  |  |  |  |  |  |  |  |  |  |  |  |  |  |  |  |  |  |  |  |  |  |  |  |  |  |  |  |  |  |  |  |  |  |  |  |  |  |  |  |  |  |  |  |  |  |  |  |  |  |  |  |  |  |  |  |  |  |  |  |  |  |  |  |  |  |  |  |  |  |  |  |
| ABB30029.1   | P   | T   | S   | R   | S   | K | R | N | L | E  | M  | E  | I  | L | T | L | S | Q | G | L | K | K | Y | Y | G | K | I | L | K | L | D | L | T | L | E | E | D | T | E | G | L | E | W | C | K | R | N | L | G | L | V | C | D | D | D | F | F | Q | K | R | I | E | E | F | F | L | T | G | E | G | H | F | N | E | V | L | Q | F | K | T | P | S | T | L | S | P | T |   |  |  |  |  |  |  |  |  |  |  |  |  |  |  |  |  |  |  |  |  |  |  |  |  |  |  |  |  |  |  |  |  |  |  |  |  |  |  |  |  |  |  |  |  |  |  |  |  |  |  |  |  |  |  |  |  |  |  |  |  |  |  |  |  |  |  |  |  |  |  |  |  |  |  |  |  |  |  |  |  |  |  |  |  |  |  |  |  |  |  |  |  |  |  |  |  |  |  |  |  |  |  |  |  |  |  |  |  |  |  |  |  |  |  |  |  |  |  |  |  |  |  |  |  |  |  |  |  |  |  |  |  |  |  |  |  |  |  |  |  |  |  |  |  |  |  |  |  |  |  |  |  |  |  |  |  |  |  |  |  |  |  |  |  |  |  |  |  |  |  |  |  |  |  |  |  |  |  |  |  |  |  |  |  |  |  |  |  |  |  |  |  |  |  |  |  |  |  |  |  |  |  |  |  |  |  |  |  |  |  |  |  |  |  |  |  |  |  |  |  |  |  |  |  |  |  |  |  |  |  |  |  |  |  |  |  |  |  |  |  |  |  |  |  |  |  |  |  |  |  |  |  |  |  |  |  |  |  |  |  |  |  |  |  |  |  |  |  |  |  |  |  |  |  |  |  |  |  |  |  |  |  |  |  |  |  |  |  |  |  |  |  |  |  |  |  |  |  |  |  |  |  |  |  |  |  |  |  |  |  |  |  |  |  |  |  |  |  |  |  |  |  |  |  |  |  |  |  |  |  |  |  |  |  |  |  |  |  |  |  |  |  |  |  |  |  |  |  |  |  |  |  |  |  |  |  |  |  |  |  |  |  |  |  |  |  |  |  |  |  |  |  |  |  |  |  |  |  |  |  |  |  |  |  |  |  |  |  |  |  |  |  |  |  |  |  |  |  |  |  |  |  |  |  |  |  |  |  |  |  |  |  |  |  |  |  |  |  |  |  |  |  |  |  |  |  |  |  |  |  |  |  |  |  |  |  |  |  |  |  |  |  |  |  |  |  |  |  |  |  |  |  |  |  |  |  |  |  |  |  |  |  |  |  |  |  |  |  |  |  |  |  |  |  |  |  |  |  |  |  |  |  |  |  |  |  |  |  |  |  |  |  |  |  |  |  |  |  |  |  |  |  |  |  |  |  |  |  |  |  |  |  |  |  |  |  |  |  |  |  |  |  |  |  |  |  |  |  |  |  |  |  |  |  |  |  |  |  |  |  |  |  |  |  |  |  |  |  |  |  |  |  |  |  |  |  |  |  |  |  |  |  |  |  |  |  |  |  |  |  |  |  |  |  |  |  |  |  |  |  |  |  |
| AIE16128.1   | P   | T   | N   | R   | S   | K | R | N | L | E  | M  | E  | I  | L | T | L | S | Q | G | L | K | K | Y | Y | G | K | V | L | K | L | D | L | T | L | E | E | D | T | E | G | L | E | W | C | K | R | N | L | G | L | T | C | D | D | N | F | F | Q | K | R | I | E | E | F | F | L | T | G | E | G | H | F | N | E | V | L | Q | F | K | T | P | S | T | L | S | P | T |   |  |  |  |  |  |  |  |  |  |  |  |  |  |  |  |  |  |  |  |  |  |  |  |  |  |  |  |  |  |  |  |  |  |  |  |  |  |  |  |  |  |  |  |  |  |  |  |  |  |  |  |  |  |  |  |  |  |  |  |  |  |  |  |  |  |  |  |  |  |  |  |  |  |  |  |  |  |  |  |  |  |  |  |  |  |  |  |  |  |  |  |  |  |  |  |  |  |  |  |  |  |  |  |  |  |  |  |  |  |  |  |  |  |  |  |  |  |  |  |  |  |  |  |  |  |  |  |  |  |  |  |  |  |  |  |  |  |  |  |  |  |  |  |  |  |  |  |  |  |  |  |  |  |  |  |  |  |  |  |  |  |  |  |  |  |  |  |  |  |  |  |  |  |  |  |  |  |  |  |  |  |  |  |  |  |  |  |  |  |  |  |  |  |  |  |  |  |  |  |  |  |  |  |  |  |  |  |  |  |  |  |  |  |  |  |  |  |  |  |  |  |  |  |  |  |  |  |  |  |  |  |  |  |  |  |  |  |  |  |  |  |  |  |  |  |  |  |  |  |  |  |  |  |  |  |  |  |  |  |  |  |  |  |  |  |  |  |  |  |  |  |  |  |  |  |  |  |  |  |  |  |  |  |  |  |  |  |  |  |  |  |  |  |  |  |  |  |  |  |  |  |  |  |  |  |  |  |  |  |  |  |  |  |  |  |  |  |  |  |  |  |  |  |  |  |  |  |  |  |  |  |  |  |  |  |  |  |  |  |  |  |  |  |  |  |  |  |  |  |  |  |  |  |  |  |  |  |  |  |  |  |  |  |  |  |  |  |  |  |  |  |  |  |  |  |  |  |  |  |  |  |  |  |  |  |  |  |  |  |  |  |  |  |  |  |  |  |  |  |  |  |  |  |  |  |  |  |  |  |  |  |  |  |  |  |  |  |  |  |  |  |  |  |  |  |  |  |  |  |  |  |  |  |  |  |  |  |  |  |  |  |  |  |  |  |  |  |  |  |  |  |  |  |  |  |  |  |  |  |  |  |  |  |  |  |  |  |  |  |  |  |  |  |  |  |  |  |  |  |  |  |  |  |  |  |  |  |  |  |  |  |  |  |  |  |  |  |  |  |  |  |  |  |  |  |  |  |  |  |  |  |  |  |  |  |  |  |  |  |  |  |  |  |  |  |  |  |  |  |  |  |  |  |  |  |  |  |  |  |  |  |  |  |  |  |  |  |  |  |  |  |  |  |  |  |  |  |  |  |  |  |  |  |  |  |  |  |  |  |  |  |  |  |  |  |  |  |  |  |  |  |  |
| AIE16130.1   | P   | T   | N   | R   | S   | K | R | N | L | E  | M  | E  | I  | L | T | L | S | Q | G | L | K | K | Y | Y | G | K | V | L | K | L | D | L | T | L | E | E | D | T | E | G | L | E | W | C | K | R | N | L | G | L | T | C | D | D | N | F | F | Q | K | R | I | E | E | F | F | L | T | G | E | G | H | F | N | E | V | L | Q | F | K | T | P | S | T | L | S | P | T |   |  |  |  |  |  |  |  |  |  |  |  |  |  |  |  |  |  |  |  |  |  |  |  |  |  |  |  |  |  |  |  |  |  |  |  |  |  |  |  |  |  |  |  |  |  |  |  |  |  |  |  |  |  |  |  |  |  |  |  |  |  |  |  |  |  |  |  |  |  |  |  |  |  |  |  |  |  |  |  |  |  |  |  |  |  |  |  |  |  |  |  |  |  |  |  |  |  |  |  |  |  |  |  |  |  |  |  |  |  |  |  |  |  |  |  |  |  |  |  |  |  |  |  |  |  |  |  |  |  |  |  |  |  |  |  |  |  |  |  |  |  |  |  |  |  |  |  |  |  |  |  |  |  |  |  |  |  |  |  |  |  |  |  |  |  |  |  |  |  |  |  |  |  |  |  |  |  |  |  |  |  |  |  |  |  |  |  |  |  |  |  |  |  |  |  |  |  |  |  |  |  |  |  |  |  |  |  |  |  |  |  |  |  |  |  |  |  |  |  |  |  |  |  |  |  |  |  |  |  |  |  |  |  |  |  |  |  |  |  |  |  |  |  |  |  |  |  |  |  |  |  |  |  |  |  |  |  |  |  |  |  |  |  |  |  |  |  |  |  |  |  |  |  |  |  |  |  |  |  |  |  |  |  |  |  |  |  |  |  |  |  |  |  |  |  |  |  |  |  |  |  |  |  |  |  |  |  |  |  |  |  |  |  |  |  |  |  |  |  |  |  |  |  |  |  |  |  |  |  |  |  |  |  |  |  |  |  |  |  |  |  |  |  |  |  |  |  |  |  |  |  |  |  |  |  |  |  |  |  |  |  |  |  |  |  |  |  |  |  |  |  |  |  |  |  |  |  |  |  |  |  |  |  |  |  |  |  |  |  |  |  |  |  |  |  |  |  |  |  |  |  |  |  |  |  |  |  |  |  |  |  |  |  |  |  |  |  |  |  |  |  |  |  |  |  |  |  |  |  |  |  |  |  |  |  |  |  |  |  |  |  |  |  |  |  |  |  |  |  |  |  |  |  |  |  |  |  |  |  |  |  |  |  |  |  |  |  |  |  |  |  |  |  |  |  |  |  |  |  |  |  |  |  |  |  |  |  |  |  |  |  |  |  |  |  |  |  |  |  |  |  |  |  |  |  |  |  |  |  |  |  |  |  |  |  |  |  |  |  |  |  |  |  |  |  |  |  |  |  |  |  |  |  |  |  |  |  |  |  |  |  |  |  |  |  |  |  |  |  |  |  |  |  |  |  |  |  |  |  |  |  |  |  |  |  |  |  |  |  |  |  |  |  |  |  |  |  |  |  |  |  |  |
| AIE16129.1   | P   | T   | N   | R   | S   | K | R | N | L | E  | M  | E  | I  | L | T | L | S | Q | G | L | K | K | Y | Y | G | K | V | L | K | L | D | L | T | L | E | E | D | T | E | G | L | E | W | C | K | R | N | L | G | L | T | C | D | D | N | F | F | Q | K | R | I | E | E | F | F | L | T | G | E | G | H | F | N | E | V | L | Q | F | K | T | P | S | T | L | S | P | T |   |  |  |  |  |  |  |  |  |  |  |  |  |  |  |  |  |  |  |  |  |  |  |  |  |  |  |  |  |  |  |  |  |  |  |  |  |  |  |  |  |  |  |  |  |  |  |  |  |  |  |  |  |  |  |  |  |  |  |  |  |  |  |  |  |  |  |  |  |  |  |  |  |  |  |  |  |  |  |  |  |  |  |  |  |  |  |  |  |  |  |  |  |  |  |  |  |  |  |  |  |  |  |  |  |  |  |  |  |  |  |  |  |  |  |  |  |  |  |  |  |  |  |  |  |  |  |  |  |  |  |  |  |  |  |  |  |  |  |  |  |  |  |  |  |  |  |  |  |  |  |  |  |  |  |  |  |  |  |  |  |  |  |  |  |  |  |  |  |  |  |  |  |  |  |  |  |  |  |  |  |  |  |  |  |  |  |  |  |  |  |  |  |  |  |  |  |  |  |  |  |  |  |  |  |  |  |  |  |  |  |  |  |  |  |  |  |  |  |  |  |  |  |  |  |  |  |  |  |  |  |  |  |  |  |  |  |  |  |  |  |  |  |  |  |  |  |  |  |  |  |  |  |  |  |  |  |  |  |  |  |  |  |  |  |  |  |  |  |  |  |  |  |  |  |  |  |  |  |  |  |  |  |  |  |  |  |  |  |  |  |  |  |  |  |  |  |  |  |  |  |  |  |  |  |  |  |  |  |  |  |  |  |  |  |  |  |  |  |  |  |  |  |  |  |  |  |  |  |  |  |  |  |  |  |  |  |  |  |  |  |  |  |  |  |  |  |  |  |  |  |  |  |  |  |  |  |  |  |  |  |  |  |  |  |  |  |  |  |  |  |  |  |  |  |  |  |  |  |  |  |  |  |  |  |  |  |  |  |  |  |  |  |  |  |  |  |  |  |  |  |  |  |  |  |  |  |  |  |  |  |  |  |  |  |  |  |  |  |  |  |  |  |  |  |  |  |  |  |  |  |  |  |  |  |  |  |  |  |  |  |  |  |  |  |  |  |  |  |  |  |  |  |  |  |  |  |  |  |  |  |  |  |  |  |  |  |  |  |  |  |  |  |  |  |  |  |  |  |  |  |  |  |  |  |  |  |  |  |  |  |  |  |  |  |  |  |  |  |  |  |  |  |  |  |  |  |  |  |  |  |  |  |  |  |  |  |  |  |  |  |  |  |  |  |  |  |  |  |  |  |  |  |  |  |  |  |  |  |  |  |  |  |  |  |  |  |  |  |  |  |  |  |  |  |  |  |  |  |  |  |  |  |  |  |  |  |  |  |  |  |  |  |  |  |  |  |  |  |  |  |  |  |
| AIE16131.1   | P   | T   | N   | R   | S   | K | R | N | L | E  | M  | E  | I  | L | T | L | S | Q | G | L | K | K | Y | Y | G | K | V | L | K | L | D | L | T | L | E | E | D | T | E | G | L | E | W | C | K | R | N | L | G | L | T | C | D | D | N | F | F | Q | K | R | I | E | E | F | F | L | T | G | E | G | H | F | N | E | V | L | Q | F | K | T | P | S | T | L | S | P | T |   |  |  |  |  |  |  |  |  |  |  |  |  |  |  |  |  |  |  |  |  |  |  |  |  |  |  |  |  |  |  |  |  |  |  |  |  |  |  |  |  |  |  |  |  |  |  |  |  |  |  |  |  |  |  |  |  |  |  |  |  |  |  |  |  |  |  |  |  |  |  |  |  |  |  |  |  |  |  |  |  |  |  |  |  |  |  |  |  |  |  |  |  |  |  |  |  |  |  |  |  |  |  |  |  |  |  |  |  |  |  |  |  |  |  |  |  |  |  |  |  |  |  |  |  |  |  |  |  |  |  |  |  |  |  |  |  |  |  |  |  |  |  |  |  |  |  |  |  |  |  |  |  |  |  |  |  |  |  |  |  |  |  |  |  |  |  |  |  |  |  |  |  |  |  |  |  |  |  |  |  |  |  |  |  |  |  |  |  |  |  |  |  |  |  |  |  |  |  |  |  |  |  |  |  |  |  |  |  |  |  |  |  |  |  |  |  |  |  |  |  |  |  |  |  |  |  |  |  |  |  |  |  |  |  |  |  |  |  |  |  |  |  |  |  |  |  |  |  |  |  |  |  |  |  |  |  |  |  |  |  |  |  |  |  |  |  |  |  |  |  |  |  |  |  |  |  |  |  |  |  |  |  |  |  |  |  |  |  |  |  |  |  |  |  |  |  |  |  |  |  |  |  |  |  |  |  |  |  |  |  |  |  |  |  |  |  |  |  |  |  |  |  |  |  |  |  |  |  |  |  |  |  |  |  |  |  |  |  |  |  |  |  |  |  |  |  |  |  |  |  |  |  |  |  |  |  |  |  |  |  |  |  |  |  |  |  |  |  |  |  |  |  |  |  |  |  |  |  |  |  |  |  |  |  |  |  |  |  |  |  |  |  |  |  |  |  |  |  |  |  |  |  |  |  |  |  |  |  |  |  |  |  |  |  |  |  |  |  |  |  |  |  |  |  |  |  |  |  |  |  |  |  |  |  |  |  |  |  |  |  |  |  |  |  |  |  |  |  |  |  |  |  |  |  |  |  |  |  |  |  |  |  |  |  |  |  |  |  |  |  |  |  |  |  |  |  |  |  |  |  |  |  |  |  |  |  |  |  |  |  |  |  |  |  |  |  |  |  |  |  |  |  |  |  |  |  |  |  |  |  |  |  |  |  |  |  |  |  |  |  |  |  |  |  |  |  |  |  |  |  |  |  |  |  |  |  |  |  |  |  |  |  |  |  |  |  |  |  |  |  |  |  |  |  |  |  |  |  |  |  |  |  |  |  |  |  |  |  |  |  |  |  |  |  |  |  |  |  |  |  |  |  |
| AIE16133.1   | P   | T   | N   | R   | S   | K | R | N | L | E  | M  | E  | I  | L | T | L | S | Q | G | L | K | K | Y | Y | G | K | V | L | K | L | D | L | T | L | E | E | D | T | E | G | L | E | W | C | K | R | N | L | G | L | T | C | D | D | N | F | F | Q | K | R | I | E | E | F | F | L | T | G | E | G | H | F | N | E | V | L | Q | F | K | T | P | S | T | L | S | P | T |   |  |  |  |  |  |  |  |  |  |  |  |  |  |  |  |  |  |  |  |  |  |  |  |  |  |  |  |  |  |  |  |  |  |  |  |  |  |  |  |  |  |  |  |  |  |  |  |  |  |  |  |  |  |  |  |  |  |  |  |  |  |  |  |  |  |  |  |  |  |  |  |  |  |  |  |  |  |  |  |  |  |  |  |  |  |  |  |  |  |  |  |  |  |  |  |  |  |  |  |  |  |  |  |  |  |  |  |  |  |  |  |  |  |  |  |  |  |  |  |  |  |  |  |  |  |  |  |  |  |  |  |  |  |  |  |  |  |  |  |  |  |  |  |  |  |  |  |  |  |  |  |  |  |  |  |  |  |  |  |  |  |  |  |  |  |  |  |  |  |  |  |  |  |  |  |  |  |  |  |  |  |  |  |  |  |  |  |  |  |  |  |  |  |  |  |  |  |  |  |  |  |  |  |  |  |  |  |  |  |  |  |  |  |  |  |  |  |  |  |  |  |  |  |  |  |  |  |  |  |  |  |  |  |  |  |  |  |  |  |  |  |  |  |  |  |  |  |  |  |  |  |  |  |  |  |  |  |  |  |  |  |  |  |  |  |  |  |  |  |  |  |  |  |  |  |  |  |  |  |  |  |  |  |  |  |  |  |  |  |  |  |  |  |  |  |  |  |  |  |  |  |  |  |  |  |  |  |  |  |  |  |  |  |  |  |  |  |  |  |  |  |  |  |  |  |  |  |  |  |  |  |  |  |  |  |  |  |  |  |  |  |  |  |  |  |  |  |  |  |  |  |  |  |  |  |  |  |  |  |  |  |  |  |  |  |  |  |  |  |  |  |  |  |  |  |  |  |  |  |  |  |  |  |  |  |  |  |  |  |  |  |  |  |  |  |  |  |  |  |  |  |  |  |  |  |  |  |  |  |  |  |  |  |  |  |  |  |  |  |  |  |  |  |  |  |  |  |  |  |  |  |  |  |  |  |  |  |  |  |  |  |  |  |  |  |  |  |  |  |  |  |  |  |  |  |  |  |  |  |  |  |  |  |  |  |  |  |  |  |  |  |  |  |  |  |  |  |  |  |  |  |  |  |  |  |  |  |  |  |  |  |  |  |  |  |  |  |  |  |  |  |  |  |  |  |  |  |  |  |  |  |  |  |  |  |  |  |  |  |  |  |  |  |  |  |  |  |  |  |  |  |  |  |  |  |  |  |  |  |  |  |  |  |  |  |  |  |  |  |  |  |  |  |  |  |  |  |  |  |  |  |  |  |  |  |  |  |  |  |  |  |  |  |  |  |  |  |  |  |  |  |  |
| AIE16132.1   | P   | T   | N   | R   | S   | K | R | N | L | E  | M  | E  | I  | L | T | L | S | Q | G | L | K | K | Y | Y | G | K | M | L | K | L | D | L | T | L | E | E | D | T | E | G | L | E | W | C | K | R | N | L | G | L | T | C | D | D | N | F | F | Q | K | R | I | E | E | F | F | L | T | G | E | G | H | F | N | E | V | L | Q | F | K | T | P | S | T | P | S | T |   |   |  |  |  |  |  |  |  |  |  |  |  |  |  |  |  |  |  |  |  |  |  |  |  |  |  |  |  |  |  |  |  |  |  |  |  |  |  |  |  |  |  |  |  |  |  |  |  |  |  |  |  |  |  |  |  |  |  |  |  |  |  |  |  |  |  |  |  |  |  |  |  |  |  |  |  |  |  |  |  |  |  |  |  |  |  |  |  |  |  |  |  |  |  |  |  |  |  |  |  |  |  |  |  |  |  |  |  |  |  |  |  |  |  |  |  |  |  |  |  |  |  |  |  |  |  |  |  |  |  |  |  |  |  |  |  |  |  |  |  |  |  |  |  |  |  |  |  |  |  |  |  |  |  |  |  |  |  |  |  |  |  |  |  |  |  |  |  |  |  |  |  |  |  |  |  |  |  |  |  |  |  |  |  |  |  |  |  |  |  |  |  |  |  |  |  |  |  |  |  |  |  |  |  |  |  |  |  |  |  |  |  |  |  |  |  |  |  |  |  |  |  |  |  |  |  |  |  |  |  |  |  |  |  |  |  |  |  |  |  |  |  |  |  |  |  |  |  |  |  |  |  |  |  |  |  |  |  |  |  |  |  |  |  |  |  |  |  |  |  |  |  |  |  |  |  |  |  |  |  |  |  |  |  |  |  |  |  |  |  |  |  |  |  |  |  |  |  |  |  |  |  |  |  |  |  |  |  |  |  |  |  |  |  |  |  |  |  |  |  |  |  |  |  |  |  |  |  |  |  |  |  |  |  |  |  |  |  |  |  |  |  |  |  |  |  |  |  |  |  |  |  |  |  |  |  |  |  |  |  |  |  |  |  |  |  |  |  |  |  |  |  |  |  |  |  |  |  |  |  |  |  |  |  |  |  |  |  |  |  |  |  |  |  |  |  |  |  |  |  |  |  |  |  |  |  |  |  |  |  |  |  |  |  |  |  |  |  |  |  |  |  |  |  |  |  |  |  |  |  |  |  |  |  |  |  |  |  |  |  |  |  |  |  |  |  |  |  |  |  |  |  |  |  |  |  |  |  |  |  |  |  |  |  |  |  |  |  |  |  |  |  |  |  |  |  |  |  |  |  |  |  |  |  |  |  |  |  |  |  |  |  |  |  |  |  |  |  |  |  |  |  |  |  |  |  |  |  |  |  |  |  |  |  |  |  |  |  |  |  |  |  |  |  |  |  |  |  |  |  |  |  |  |  |  |  |  |  |  |  |  |  |  |  |  |  |  |  |  |  |  |  |  |  |  |  |  |  |  |  |  |  |  |  |  |  |  |  |  |  |  |  |  |  |  |  |  |  |  |  |  |  |  |
| ABB30032.1   | P   | T   | N   | R   | S   | K | R | N | L | E  | M  | E  | I  | L | T | L | S | Q | G | L | R | K | Y | Y | G | R | I | L | K | L | D | L | T | L | E | E | D | T | E | G | L | E | W | C | K | R | N | L | G | L | T | C | D | D | N | F | F | Q | K | R | I | E | E | F | F | L | T | G | E | G | H | F | N | E | V | L | Q | F | K | T | P | S | T | L | S | S | T |   |  |  |  |  |  |  |  |  |  |  |  |  |  |  |  |  |  |  |  |  |  |  |  |  |  |  |  |  |  |  |  |  |  |  |  |  |  |  |  |  |  |  |  |  |  |  |  |  |  |  |  |  |  |  |  |  |  |  |  |  |  |  |  |  |  |  |  |  |  |  |  |  |  |  |  |  |  |  |  |  |  |  |  |  |  |  |  |  |  |  |  |  |  |  |  |  |  |  |  |  |  |  |  |  |  |  |  |  |  |  |  |  |  |  |  |  |  |  |  |  |  |  |  |  |  |  |  |  |  |  |  |  |  |  |  |  |  |  |  |  |  |  |  |  |  |  |  |  |  |  |  |  |  |  |  |  |  |  |  |  |  |  |  |  |  |  |  |  |  |  |  |  |  |  |  |  |  |  |  |  |  |  |  |  |  |  |  |  |  |  |  |  |  |  |  |  |  |  |  |  |  |  |  |  |  |  |  |  |  |  |  |  |  |  |  |  |  |  |  |  |  |  |  |  |  |  |  |  |  |  |  |  |  |  |  |  |  |  |  |  |  |  |  |  |  |  |  |  |  |  |  |  |  |  |  |  |  |  |  |  |  |  |  |  |  |  |  |  |  |  |  |  |  |  |  |  |  |  |  |  |  |  |  |  |  |  |  |  |  |  |  |  |  |  |  |  |  |  |  |  |  |  |  |  |  |  |  |  |  |  |  |  |  |  |  |  |  |  |  |  |  |  |  |  |  |  |  |  |  |  |  |  |  |  |  |  |  |  |  |  |  |  |  |  |  |  |  |  |  |  |  |  |  |  |  |  |  |  |  |  |  |  |  |  |  |  |  |  |  |  |  |  |  |  |  |  |  |  |  |  |  |  |  |  |  |  |  |  |  |  |  |  |  |  |  |  |  |  |  |  |  |  |  |  |  |  |  |  |  |  |  |  |  |  |  |  |  |  |  |  |  |  |  |  |  |  |  |  |  |  |  |  |  |  |  |  |  |  |  |  |  |  |  |  |  |  |  |  |  |  |  |  |  |  |  |  |  |  |  |  |  |  |  |  |  |  |  |  |  |  |  |  |  |  |  |  |  |  |  |  |  |  |  |  |  |  |  |  |  |  |  |  |  |  |  |  |  |  |  |  |  |  |  |  |  |  |  |  |  |  |  |  |  |  |  |  |  |  |  |  |  |  |  |  |  |  |  |  |  |  |  |  |  |  |  |  |  |  |  |  |  |  |  |  |  |  |  |  |  |  |  |  |  |  |  |  |  |  |  |  |  |  |  |  |  |  |  |  |  |  |  |  |  |  |  |  |  |  |  |  |  |  |
| ABB30033.1   | P   | T   | N   | R   | S   | K | R | N | L | E  | M  | E  | I  | L | T | L | S | Q | G | L | R | K | Y | Y | G | K | I | L | K | F | L | D | L | T | L | E | E | D | T | E | G | L | E | W | C | K | R | N | L | G | L | T | C | D | D | N | F | F | Q | K | R | I | E | E | F | F | L | T | G | E | G | Y | F | N | E | V | L | Q | F | K | V | P | S | T | L | S | S | T |  |  |  |  |  |  |  |  |  |  |  |  |  |  |  |  |  |  |  |  |  |  |  |  |  |  |  |  |  |  |  |  |  |  |  |  |  |  |  |  |  |  |  |  |  |  |  |  |  |  |  |  |  |  |  |  |  |  |  |  |  |  |  |  |  |  |  |  |  |  |  |  |  |  |  |  |  |  |  |  |  |  |  |  |  |  |  |  |  |  |  |  |  |  |  |  |  |  |  |  |  |  |  |  |  |  |  |  |  |  |  |  |  |  |  |  |  |  |  |  |  |  |  |  |  |  |  |  |  |  |  |  |  |  |  |  |  |  |  |  |  |  |  |  |  |  |  |  |  |  |  |  |  |  |  |  |  |  |  |  |  |  |  |  |  |  |  |  |  |  |  |  |  |  |  |  |  |  |  |  |  |  |  |  |  |  |  |  |  |  |  |  |  |  |  |  |  |  |  |  |  |  |  |  |  |  |  |  |  |  |  |  |  |  |  |  |  |  |  |  |  |  |  |  |  |  |  |  |  |  |  |  |  |  |  |  |  |  |  |  |  |  |  |  |  |  |  |  |  |  |  |  |  |  |  |  |  |  |  |  |  |  |  |  |  |  |  |  |  |  |  |  |  |  |  |  |  |  |  |  |  |  |  |  |  |  |  |  |  |  |  |  |  |  |  |  |  |  |  |  |  |  |  |  |  |  |  |  |  |  |  |  |  |  |  |  |  |  |  |  |  |  |  |  |  |  |  |  |  |  |  |  |  |  |  |  |  |  |  |  |  |  |  |  |  |  |  |  |  |  |  |  |  |  |  |  |  |  |  |  |  |  |  |  |  |  |  |  |  |  |  |  |  |  |  |  |  |  |  |  |  |  |  |  |  |  |  |  |  |  |  |  |  |  |  |  |  |  |  |  |  |  |  |  |  |  |  |  |  |  |  |  |  |  |  |  |  |  |  |  |  |  |  |  |  |  |  |  |  |  |  |  |  |  |  |  |  |  |  |  |  |  |  |  |  |  |  |  |  |  |  |  |  |  |  |  |  |  |  |  |  |  |  |  |  |  |  |  |  |  |  |  |  |  |  |  |  |  |  |  |  |  |  |  |  |  |  |  |  |  |  |  |  |  |  |  |  |  |  |  |  |  |  |  |  |  |  |  |  |  |  |  |  |  |  |  |  |  |  |  |  |  |  |  |  |  |  |  |  |  |  |  |  |  |  |  |  |  |  |  |  |  |  |  |  |  |  |  |  |  |  |  |  |  |  |  |  |  |  |  |  |  |  |  |  |  |  |  |  |  |  |  |  |  |  |  |  |  |  |  |  |  |
| AIE16134.1   | P   | T   | N   | R   | S   | K | R | N | L | E  | M  | E  | I  | L | T | L | S | Q | G | L | R | K | Y | Y | G | K | I | L | K | F | L | D | L | T | L | E | E | D | T | E | G | L | E | W | C | K | R | N | L | G | L | T | C | D | D | N | F | F | Q | K | R | I | E | E | F | F | L | T | G | E | G | Y | F | N | E | V | L | Q | F | K | V | P | S | T | L | S | S | T |  |  |  |  |  |  |  |  |  |  |  |  |  |  |  |  |  |  |  |  |  |  |  |  |  |  |  |  |  |  |  |  |  |  |  |  |  |  |  |  |  |  |  |  |  |  |  |  |  |  |  |  |  |  |  |  |  |  |  |  |  |  |  |  |  |  |  |  |  |  |  |  |  |  |  |  |  |  |  |  |  |  |  |  |  |  |  |  |  |  |  |  |  |  |  |  |  |  |  |  |  |  |  |  |  |  |  |  |  |  |  |  |  |  |  |  |  |  |  |  |  |  |  |  |  |  |  |  |  |  |  |  |  |  |  |  |  |  |  |  |  |  |  |  |  |  |  |  |  |  |  |  |  |  |  |  |  |  |  |  |  |  |  |  |  |  |  |  |  |  |  |  |  |  |  |  |  |  |  |  |  |  |  |  |  |  |  |  |  |  |  |  |  |  |  |  |  |  |  |  |  |  |  |  |  |  |  |  |  |  |  |  |  |  |  |  |  |  |  |  |  |  |  |  |  |  |  |  |  |  |  |  |  |  |  |  |  |  |  |  |  |  |  |  |  |  |  |  |  |  |  |  |  |  |  |  |  |  |  |  |  |  |  |  |  |  |  |  |  |  |  |  |  |  |  |  |  |  |  |  |  |  |  |  |  |  |  |  |  |  |  |  |  |  |  |  |  |  |  |  |  |  |  |  |  |  |  |  |  |  |  |  |  |  |  |  |  |  |  |  |  |  |  |  |  |  |  |  |  |  |  |  |  |  |  |  |  |  |  |  |  |  |  |  |  |  |  |  |  |  |  |  |  |  |  |  |  |  |  |  |  |  |  |  |  |  |  |  |  |  |  |  |  |  |  |  |  |  |  |  |  |  |  |  |  |  |  |  |  |  |  |  |  |  |  |  |  |  |  |  |  |  |  |  |  |  |  |  |  |  |  |  |  |  |  |  |  |  |  |  |  |  |  |  |  |  |  |  |  |  |  |  |  |  |  |  |  |  |  |  |  |  |  |  |  |  |  |  |  |  |  |  |  |  |  |  |  |  |  |  |  |  |  |  |  |  |  |  |  |  |  |  |  |  |  |  |  |  |  |  |  |  |  |  |  |  |  |  |  |  |  |  |  |  |  |  |  |  |  |  |  |  |  |  |  |  |  |  |  |  |  |  |  |  |  |  |  |  |  |  |  |  |  |  |  |  |  |  |  |  |  |  |  |  |  |  |  |  |  |  |  |  |  |  |  |  |  |  |  |  |  |  |  |  |  |  |  |  |  |  |  |  |  |  |  |  |  |  |  |  |  |  |  |  |  |  |  |  |  |  |  |  |
| ABB30035.1   | P   | T   | N   | R   | S   | K | R | N | L | E  | M  | E  | I  | L | T | L | S | Q | G | L | R | K | Y | Y | G | K | I | L | K | L | D | L | T | L | E | E | D | T | E | G | L | E | W | C | K | R | N | L | G | L | T | C | D | D | N | F | F | Q | K | R | I | E | E | F | F | L | T | G | E | G | Y | F | N | E | V | L | Q | F | K | V | P | S | T | L | S | S | T |   |  |  |  |  |  |  |  |  |  |  |  |  |  |  |  |  |  |  |  |  |  |  |  |  |  |  |  |  |  |  |  |  |  |  |  |  |  |  |  |  |  |  |  |  |  |  |  |  |  |  |  |  |  |  |  |  |  |  |  |  |  |  |  |  |  |  |  |  |  |  |  |  |  |  |  |  |  |  |  |  |  |  |  |  |  |  |  |  |  |  |  |  |  |  |  |  |  |  |  |  |  |  |  |  |  |  |  |  |  |  |  |  |  |  |  |  |  |  |  |  |  |  |  |  |  |  |  |  |  |  |  |  |  |  |  |  |  |  |  |  |  |  |  |  |  |  |  |  |  |  |  |  |  |  |  |  |  |  |  |  |  |  |  |  |  |  |  |  |  |  |  |  |  |  |  |  |  |  |  |  |  |  |  |  |  |  |  |  |  |  |  |  |  |  |  |  |  |  |  |  |  |  |  |  |  |  |  |  |  |  |  |  |  |  |  |  |  |  |  |  |  |  |  |  |  |  |  |  |  |  |  |  |  |  |  |  |  |  |  |  |  |  |  |  |  |  |  |  |  |  |  |  |  |  |  |  |  |  |  |  |  |  |  |  |  |  |  |  |  |  |  |  |  |  |  |  |  |  |  |  |  |  |  |  |  |  |  |  |  |  |  |  |  |  |  |  |  |  |  |  |  |  |  |  |  |  |  |  |  |  |  |  |  |  |  |  |  |  |  |  |  |  |  |  |  |  |  |  |  |  |  |  |  |  |  |  |  |  |  |  |  |  |  |  |  |  |  |  |  |  |  |  |  |  |  |  |  |  |  |  |  |  |  |  |  |  |  |  |  |  |  |  |  |  |  |  |  |  |  |  |  |  |  |  |  |  |  |  |  |  |  |  |  |  |  |  |  |  |  |  |  |  |  |  |  |  |  |  |  |  |  |  |  |  |  |  |  |  |  |  |  |  |  |  |  |  |  |  |  |  |  |  |  |  |  |  |  |  |  |  |  |  |  |  |  |  |  |  |  |  |  |  |  |  |  |  |  |  |  |  |  |  |  |  |  |  |  |  |  |  |  |  |  |  |  |  |  |  |  |  |  |  |  |  |  |  |  |  |  |  |  |  |  |  |  |  |  |  |  |  |  |  |  |  |  |  |  |  |  |  |  |  |  |  |  |  |  |  |  |  |  |  |  |  |  |  |  |  |  |  |  |  |  |  |  |  |  |  |  |  |  |  |  |  |  |  |  |  |  |  |  |  |  |  |  |  |  |  |  |  |  |  |  |  |  |  |  |  |  |  |  |  |  |  |  |  |  |  |  |  |  |  |
| AIE16135.1   | P   | T   | N   | R   | S   | K | R | N | L | E  | M  | E  | I  | L | T | L | S | Q | G | L | R | K | Y | Y | G | K | I | L | K | L | D | L | T | L | E | E | D | T | E | G | L | E | W | C | K | R | N | L | G | L | T | C | D | D | N | F | F | Q | K | R | I | E | E | F | F | L | T | G | E | G | Y | F | N | E | V | L | Q | F | K | V | P | S | T | L | S | S | T |   |  |  |  |  |  |  |  |  |  |  |  |  |  |  |  |  |  |  |  |  |  |  |  |  |  |  |  |  |  |  |  |  |  |  |  |  |  |  |  |  |  |  |  |  |  |  |  |  |  |  |  |  |  |  |  |  |  |  |  |  |  |  |  |  |  |  |  |  |  |  |  |  |  |  |  |  |  |  |  |  |  |  |  |  |  |  |  |  |  |  |  |  |  |  |  |  |  |  |  |  |  |  |  |  |  |  |  |  |  |  |  |  |  |  |  |  |  |  |  |  |  |  |  |  |  |  |  |  |  |  |  |  |  |  |  |  |  |  |  |  |  |  |  |  |  |  |  |  |  |  |  |  |  |  |  |  |  |  |  |  |  |  |  |  |  |  |  |  |  |  |  |  |  |  |  |  |  |  |  |  |  |  |  |  |  |  |  |  |  |  |  |  |  |  |  |  |  |  |  |  |  |  |  |  |  |  |  |  |  |  |  |  |  |  |  |  |  |  |  |  |  |  |  |  |  |  |  |  |  |  |  |  |  |  |  |  |  |  |  |  |  |  |  |  |  |  |  |  |  |  |  |  |  |  |  |  |  |  |  |  |  |  |  |  |  |  |  |  |  |  |  |  |  |  |  |  |  |  |  |  |  |  |  |  |  |  |  |  |  |  |  |  |  |  |  |  |  |  |  |  |  |  |  |  |  |  |  |  |  |  |  |  |  |  |  |  |  |  |  |  |  |  |  |  |  |  |  |  |  |  |  |  |  |  |  |  |  |  |  |  |  |  |  |  |  |  |  |  |  |  |  |  |  |  |  |  |  |  |  |  |  |  |  |  |  |  |  |  |  |  |  |  |  |  |  |  |  |  |  |  |  |  |  |  |  |  |  |  |  |  |  |  |  |  |  |  |  |  |  |  |  |  |  |  |  |  |  |  |  |  |  |  |  |  |  |  |  |  |  |  |  |  |  |  |  |  |  |  |  |  |  |  |  |  |  |  |  |  |  |  |  |  |  |  |  |  |  |  |  |  |  |  |  |  |  |  |  |  |  |  |  |  |  |  |  |  |  |  |  |  |  |  |  |  |  |  |  |  |  |  |  |  |  |  |  |  |  |  |  |  |  |  |  |  |  |  |  |  |  |  |  |  |  |  |  |  |  |  |  |  |  |  |  |  |  |  |  |  |  |  |  |  |  |  |  |  |  |  |  |  |  |  |  |  |  |  |  |  |  |  |  |  |  |  |  |  |  |  |  |  |  |  |  |  |  |  |  |  |  |  |  |  |  |  |  |  |  |  |  |  |  |  |  |  |  |  |  |  |  |  |  |  |
| AAK52742.1   | P   | T   | N   | R   | S   | K | R | N | L | E  | M  | E  | I  | L | T | L | S | Q | G | L | R | K | Y | Y | G | K | I | Q | K | L | T | L | T | L | E | E | D | T | E | G | L | E | W | C | K | R | N | L | G | L | T | C | D | D | N | F | F | Q | K | R | I | E | E | F | F | L | T | G | E | G | Y | F | N | E | V | L | Q | F | K | T | P | S | T | P | G | S | T |   |  |  |  |  |  |  |  |  |  |  |  |  |  |  |  |  |  |  |  |  |  |  |  |  |  |  |  |  |  |  |  |  |  |  |  |  |  |  |  |  |  |  |  |  |  |  |  |  |  |  |  |  |  |  |  |  |  |  |  |  |  |  |  |  |  |  |  |  |  |  |  |  |  |  |  |  |  |  |  |  |  |  |  |  |  |  |  |  |  |  |  |  |  |  |  |  |  |  |  |  |  |  |  |  |  |  |  |  |  |  |  |  |  |  |  |  |  |  |  |  |  |  |  |  |  |  |  |  |  |  |  |  |  |  |  |  |  |  |  |  |  |  |  |  |  |  |  |  |  |  |  |  |  |  |  |  |  |  |  |  |  |  |  |  |  |  |  |  |  |  |  |  |  |  |  |  |  |  |  |  |  |  |  |  |  |  |  |  |  |  |  |  |  |  |  |  |  |  |  |  |  |  |  |  |  |  |  |  |  |  |  |  |  |  |  |  |  |  |  |  |  |  |  |  |  |  |  |  |  |  |  |  |  |  |  |  |  |  |  |  |  |  |  |  |  |  |  |  |  |  |  |  |  |  |  |  |  |  |  |  |  |  |  |  |  |  |  |  |  |  |  |  |  |  |  |  |  |  |  |  |  |  |  |  |  |  |  |  |  |  |  |  |  |  |  |  |  |  |  |  |  |  |  |  |  |  |  |  |  |  |  |  |  |  |  |  |  |  |  |  |  |  |  |  |  |  |  |  |  |  |  |  |  |  |  |  |  |  |  |  |  |  |  |  |  |  |  |  |  |  |  |  |  |  |  |  |  |  |  |  |  |  |  |  |  |  |  |  |  |  |  |  |  |  |  |  |  |  |  |  |  |  |  |  |  |  |  |  |  |  |  |  |  |  |  |  |  |  |  |  |  |  |  |  |  |  |  |  |  |  |  |  |  |  |  |  |  |  |  |  |  |  |  |  |  |  |  |  |  |  |  |  |  |  |  |  |  |  |  |  |  |  |  |  |  |  |  |  |  |  |  |  |  |  |  |  |  |  |  |  |  |  |  |  |  |  |  |  |  |  |  |  |  |  |  |  |  |  |  |  |  |  |  |  |  |  |  |  |  |  |  |  |  |  |  |  |  |  |  |  |  |  |  |  |  |  |  |  |  |  |  |  |  |  |  |  |  |  |  |  |  |  |  |  |  |  |  |  |  |  |  |  |  |  |  |  |  |  |  |  |  |  |  |  |  |  |  |  |  |  |  |  |  |  |  |  |  |  |  |  |  |  |  |  |  |  |  |  |  |  |  |  |  |  |  |  |  |  |  |  |  |  |
| BAB84572.1   | P   | T   | N   | R   | S   | K | R | N | L | E  | M  | E  | I  | L | T | L | S | Q | G | L | R | K | Y | Y | G | K | I | Q | K | L | T | L | T | L | E | E | D | T | E | G | L | E | W | C | K | R | N | L | G | L | T | C | D | D | N | F | F | Q | K | R | I | E | E | F | F | L | T | G | E | G | Y | F | N | E | V | L | Q | F | K | T | P | S | T | P | G | S | T |   |  |  |  |  |  |  |  |  |  |  |  |  |  |  |  |  |  |  |  |  |  |  |  |  |  |  |  |  |  |  |  |  |  |  |  |  |  |  |  |  |  |  |  |  |  |  |  |  |  |  |  |  |  |  |  |  |  |  |  |  |  |  |  |  |  |  |  |  |  |  |  |  |  |  |  |  |  |  |  |  |  |  |  |  |  |  |  |  |  |  |  |  |  |  |  |  |  |  |  |  |  |  |  |  |  |  |  |  |  |  |  |  |  |  |  |  |  |  |  |  |  |  |  |  |  |  |  |  |  |  |  |  |  |  |  |  |  |  |  |  |  |  |  |  |  |  |  |  |  |  |  |  |  |  |  |  |  |  |  |  |  |  |  |  |  |  |  |  |  |  |  |  |  |  |  |  |  |  |  |  |  |  |  |  |  |  |  |  |  |  |  |  |  |  |  |  |  |  |  |  |  |  |  |  |  |  |  |  |  |  |  |  |  |  |  |  |  |  |  |  |  |  |  |  |  |  |  |  |  |  |  |  |  |  |  |  |  |  |  |  |  |  |  |  |  |  |  |  |  |  |  |  |  |  |  |  |  |  |  |  |  |  |  |  |  |  |  |  |  |  |  |  |  |  |  |  |  |  |  |  |  |  |  |  |  |  |  |  |  |  |  |  |  |  |  |  |  |  |  |  |  |  |  |  |  |  |  |  |  |  |  |  |  |  |  |  |  |  |  |  |  |  |  |  |  |  |  |  |  |  |  |  |  |  |  |  |  |  |  |  |  |  |  |  |  |  |  |  |  |  |  |  |  |  |  |  |  |  |  |  |  |  |  |  |  |  |  |  |  |  |  |  |  |  |  |  |  |  |  |  |  |  |  |  |  |  |  |  |  |  |  |  |  |  |  |  |  |  |  |  |  |  |  |  |  |  |  |  |  |  |  |  |  |  |  |  |  |  |  |  |  |  |  |  |  |  |  |  |  |  |  |  |  |  |  |  |  |  |  |  |  |  |  |  |  |  |  |  |  |  |  |  |  |  |  |  |  |  |  |  |  |  |  |  |  |  |  |  |  |  |  |  |  |  |  |  |  |  |  |  |  |  |  |  |  |  |  |  |  |  |  |  |  |  |  |  |  |  |  |  |  |  |  |  |  |  |  |  |  |  |  |  |  |  |  |  |  |  |  |  |  |  |  |  |  |  |  |  |  |  |  |  |  |  |  |  |  |  |  |  |  |  |  |  |  |  |  |  |  |  |  |  |  |  |  |  |  |  |  |  |  |  |  |  |  |  |  |  |  |  |  |  |  |  |  |  |  |  |  |  |  |  |
| Consensus    | P   | T   | N   | R   | S   | K | R | N | L | E  | M  | E  | I  | L | T | L | S | Q | G | L | K | K | Y | Y | G | K | I | L | K | L | D | L | T | L | E | E | D | T | E | G | L | E | W | C | K | R | N | L | G | L | T | C | D | D | N | F | F | Q | K | R | I | E | E | F | F | L | T | G | E | G | H | F | N | E | V | L | Q | F | K | T | P | S | T | L | S | P | T |   |  |  |  |  |  |  |  |  |  |  |  |  |  |  |  |  |  |  |  |  |  |  |  |  |  |  |  |  |  |  |  |  |  |  |  |  |  |  |  |  |  |  |  |  |  |  |  |  |  |  |  |  |  |  |  |  |  |  |  |  |  |  |  |  |  |  |  |  |  |  |  |  |  |  |  |  |  |  |  |  |  |  |  |  |  |  |  |  |  |  |  |  |  |  |  |  |  |  |  |  |  |  |  |  |  |  |  |  |  |  |  |  |  |  |  |  |  |  |  |  |  |  |  |  |  |  |  |  |  |  |  |  |  |  |  |  |  |  |  |  |  |  |  |  |  |  |  |  |  |  |  |  |  |  |  |  |  |  |  |  |  |  |  |  |  |  |  |  |  |  |  |  |  |  |  |  |  |  |  |  |  |  |  |  |  |  |  |  |  |  |  |  |  |  |  |  |  |  |  |  |  |  |  |  |  |  |  |  |  |  |  |  |  |  |  |  |  |  |  |  |  |  |  |  |  |  |  |  |  |  |  |  |  |  |  |  |  |  |  |  |  |  |  |  |  |  |  |  |  |  |  |  |  |  |  |  |  |  |  |  |  |  |  |  |  |  |  |  |  |  |  |  |  |  |  |  |  |  |  |  |  |  |  |  |  |  |  |  |  |  |  |  |  |  |  |  |  |  |  |  |  |  |  |  |  |  |  |  |  |  |  |  |  |  |  |  |  |  |  |  |  |  |  |  |  |  |  |  |  |  |  |  |  |  |  |  |  |  |  |  |  |  |  |  |  |  |  |  |  |  |  |  |  |  |  |  |  |  |  |  |  |  |  |  |  |  |  |  |  |  |  |  |  |  |  |  |  |  |  |  |  |  |  |  |  |  |  |  |  |  |  |  |  |  |  |  |  |  |  |  |  |  |  |  |  |  |  |  |  |  |  |  |  |  |  |  |  |  |  |  |  |  |  |  |  |  |  |  |  |  |  |  |  |  |  |  |  |  |  |  |  |  |  |  |  |  |  |  |  |  |  |  |  |  |  |  |  |  |  |  |  |  |  |  |  |  |  |  |  |  |  |  |  |  |  |  |  |  |  |  |  |  |  |  |  |  |  |  |  |  |  |  |  |  |  |  |  |  |  |  |  |  |  |  |  |  |  |  |  |  |  |  |  |  |  |  |  |  |  |  |  |  |  |  |  |  |  |  |  |  |  |  |  |  |  |  |  |  |  |  |  |  |  |  |  |  |  |  |  |  |  |  |  |  |  |  |  |  |  |  |  |  |  |  |  |  |  |  |  |  |  |  |  |  |  |  |  |  |  |  |  |  |
|              | 100 | 120 | 140 | 160 | 180 |   |   |   |   |    |    |    |    |   |   |   |   |   |   |   |   |   |   |   |   |   |   |   |   |   |   |   |   |   |   |   |   |   |   |   |   |   |   |   |   |   |   |   |   |   |   |   |   |   |   |   |   |   |   |   |   |   |   |   |   |   |   |   |   |   |   |   |   |   |   |   |   |   |   |   |   |   |   |   |   |   |   |   |  |  |  |  |  |  |  |  |  |  |  |  |  |  |  |  |  |  |  |  |  |  |  |  |  |  |  |  |  |  |  |  |  |  |  |  |  |  |  |  |  |  |  |  |  |  |  |  |  |  |  |  |  |  |  |  |  |  |  |  |  |  |  |  |  |  |  |  |  |  |  |  |  |  |  |  |  |  |  |  |  |  |  |  |  |  |  |  |  |  |  |  |  |  |  |  |  |  |  |  |  |  |  |  |  |  |  |  |  |  |  |  |  |  |  |  |  |  |  |  |  |  |  |  |  |  |  |  |  |  |  |  |  |  |  |  |  |  |  |  |  |  |  |  |  |  |  |  |  |  |  |  |  |  |  |  |  |  |  |  |  |  |  |  |  |  |  |  |  |  |  |  |  |  |  |  |  |  |  |  |  |  |  |  |  |  |  |  |  |  |  |  |  |  |  |  |  |  |  |  |  |  |  |  |  |  |  |  |  |  |  |  |  |  |  |  |  |  |  |  |  |  |  |  |  |  |  |  |  |  |  |  |  |  |  |  |  |  |  |  |  |  |  |  |  |  |  |  |  |  |  |  |  |  |  |  |  |  |  |  |  |  |  |  |  |  |  |  |  |  |  |  |  |  |  |  |  |  |  |  |  |  |  |  |  |  |  |  |  |  |  |  |  |  |  |  |  |  |  |  |  |  |  |  |  |  |  |  |  |  |  |  |  |  |  |  |  |  |  |  |  |  |  |  |  |  |  |  |  |  |  |  |  |  |  |  |  |  |  |  |  |  |  |  |  |  |  |  |  |  |  |  |  |  |  |  |  |  |  |  |  |  |  |  |  |  |  |  |  |  |  |  |  |  |  |  |  |  |  |  |  |  |  |  |  |  |  |  |  |  |  |  |  |  |  |  |  |  |  |  |  |  |  |  |  |  |  |  |  |  |  |  |  |  |  |  |  |  |  |  |  |  |  |  |  |  |  |  |  |  |  |  |  |  |  |  |  |  |  |  |  |  |  |  |  |  |  |  |  |  |  |  |  |  |  |  |  |  |  |  |  |  |  |  |  |  |  |  |  |  |  |  |  |  |  |  |  |  |  |  |  |  |  |  |  |  |  |  |  |  |  |  |  |  |  |  |  |  |  |  |  |  |  |  |  |  |  |  |  |  |  |  |  |  |  |  |  |  |  |  |  |  |  |  |  |  |  |  |  |  |  |  |  |  |  |  |  |  |  |  |  |  |  |  |  |  |  |  |  |  |  |  |  |  |  |  |  |  |  |  |  |  |  |  |  |  |  |  |  |  |  |  |  |  |  |  |  |  |  |  |  |  |

|            | 280 |   | 300 |   | 320 |   | 340 |   | 360 |   |   |   |   |   |   |   |   |   |   |   |   |   |   |   |   |   |   |   |   |   |   |   |   |   |   |   |   |   |   |   |   |   |   |   |   |   |   |   |   |   |   |   |   |   |   |   |   |   |   |   |   |   |   |   |   |   |   |   |   |   |   |   |   |   |   |   |   |   |   |   |   |   |   |   |   |   |   |   |   |
|------------|-----|---|-----|---|-----|---|-----|---|-----|---|---|---|---|---|---|---|---|---|---|---|---|---|---|---|---|---|---|---|---|---|---|---|---|---|---|---|---|---|---|---|---|---|---|---|---|---|---|---|---|---|---|---|---|---|---|---|---|---|---|---|---|---|---|---|---|---|---|---|---|---|---|---|---|---|---|---|---|---|---|---|---|---|---|---|---|---|---|---|---|
| AAM48107.1 | A   | S | S   | G | S   | R | R   | L | L   | S | E | E | S | G | D | D | C | I | S | R | T | Q | L | L | R | T | E | T | A | E | I | H | S | D | S | Y | G | G | P | G | D | K | I | T | I | C | N | G | S | T | I | V | D | R | L | G | S | E | L | G | C | Y | T | I | N | R | V | K | S | F | K | L | C | E | N | S | A | T | G | K | S | C | E | I | D | S | T | P | V |
| BAB84577.1 | A   | S | S   | G | S   | R | R   | L | L   | S | E | E | S | G | D | D | C | I | S | R | T | Q | L | L | R | T | E | T | A | E | I | H | N | D | N | Y | G | G | P | G | D | K | I | T | I | C | N | G | S | T | I | V | D | R | L | G | S | E | L | G | C | Y | T | I | N | R | V | K | S | F | K | L | C | E | N | S | A | T | G | K | S | C | E | I | D | S | T | P | V |
| BAB84578.1 | A   | S | S   | G | S   | R | R   | L | L   | S | E | E | S | G | D | D | C | I | S | R | T | Q | L | L | R | T | E | T | A | E | I | H | S | D | N | Y | G | G | P | G | D | K | I | T | I | C | N | G | S | T | I | V | D | R | L | G | S | E | L | G | C | Y | T | I | N | R | V | K | S | F | K | L | C | E | N | S | A | T | G | K | S | C | E | I | D | S | T | P | V |
| AAK18286.1 | A   | S | S   | G | S   | R | R   | L | L   | S | E | E | S | G | D | D | C | I | S | R | T | Q | L | L | R | T | E | T | A | E | I | H | S | D | N | Y | G | G | P | G | D | K | I | T | I | C | N | G | S | T | I | V | D | R | L | G | S | E | L | G | C | Y | T | I | N | R | V | K | S | F | K | L | C | E | N | S | A | T | G | K | S | C | E | I | D | S | T | P | V |
| AAK52743.1 | A   | S | S   | G | S   | R | R   | L | L   | S | E | E | S | G | D | D | C | I | S | R | T | Q | L | L | R | T | E | T | A | E | I | H | N | D | N | Y | G | G | P | G | D | K | I | T | I | C | N | G | S | T | I | V | D | R | L | G | S | E | L | G | C | Y | T | I | N | R | V | K | S | F | N | L | C | E | N | T | A | T | G | K | S | C | E | I | D | S | T | P | V |
| AAW84284.1 | A   | S | S   | G | S   | R | R   | L | L   | S | E | E | S | G | D | D | C | I | S | R | T | Q | L | S | R | T | E | T | A | E | I | H | S | D | N | Y | G | G | P | G | D | K | I | T | I | C | N | G | S | T | I | V | D | R | L | G | S | E | L | G | C | Y | T | I | N | R | V | K | S | F | K | L | C | E | N | S | A | T | G | K | S | C | E | I | D | S | T | P | V |
| ABB30029.1 | A   | S | S   | G | S   | R | R   | L | L   | S | E | E | S | G | D | D | C | I | S | R | T | Q | L | S | R | T | E | T | A | E | I | H | S | D | N | Y | G | G | P | G | D | K | I | T | I | C | N | G | S | T | I | V | D | R | L | G | S | E | L | G | C | Y | T | I | N | R | V | K | S | F | K | L | C | E | N | S | A | T | G | K | S | C | E | I | D | S | T | P | V |
| AIE16128.1 | A   | S | S   | G | S   | R | R   | L | L   | S | E | E | S | N | D | D | C | I | S | R | T | Q | L | L | R | T | E | N | A | E | I | H | S | D | N | Y | G | G | P | G | D | K | I | T | I | C | N | G | S | T | I | V | D | R | L | G | S | E | L | G | C | Y | T | I | N | R | V | K | S | F | K | L | C | E | N | S | A | T | G | K | S | C | E | I | D | S | T | P | V |
| AIE16130.1 | A   | S | S   | G | S   | R | R   | L | L   | S | E | E | P | N | Y | D | C | I | S | R | T | Q | L | L | R | T | E | N | A | E | I | H | S | D | N | Y | G | G | P | G | D | K | I | T | I | C | N | G | S | T | I | V | D | R | L | G | S | E | L | G | C | Y | T | I | N | R | V | K | S | F | K | L | C | E | N | S | A | T | G | K | S | C | E | I | D | S | T | P | V |
| AIE16129.1 | A   | S | S   | G | S   | R | R   | L | L   | S | E | E | S | N | D | D | C | I | S | R | T | Q | L | L | R | T | E | N | A | E | I | H | S | D | N | Y | G | G | P | G | D | K | I | T | I | C | N | G | S | T | I | V | D | R | L | G | S | E | L | G | C | Y | T | I | N | R | V | K | S | F | K | L | C | E | N | S | A | T | G | K | S | C | E | I | D | S | T | P | V |
| AIE16131.1 | A   | S | S   | G | S   | R | R   | L | L   | S | E | E | S | N | D | D | C | I | S | R | T | Q | L | L | R | T | E | N | A | E | I | H | S | D | N | Y | G | G | P | G | D | K | I | T | I | C | N | G | S | T | I | V | D | R | L | G | S | E | L | G | C | Y | T | I | N | R | V | K | S | F | K | L | C | E | N | S | A | T | G | K | S | C | E | I | D | S | T | P | V |
| AIE16133.1 | A   | S | S   | G | S   | R | R   | L | L   | S | E | E | S | N | D | D | C | I | S | R | T | Q | L | L | R | T | E | N | A | E | I | H | S | D | N | Y | G | G | P | G | D | K | I | T | I | C | N | G | S | T | I | V | D | R | L | G | S | E | L | G | C | Y | T | I | N | R | V | K | S | F | K | L | C | E | N | S | A | T | G | K | S | C | E | I | D | S | T | P | V |
| AIE16132.1 | A   | S | S   | G | S   | R | R   | L | L   | S | E | E | S | D | D | C | I | S | R | T | Q | L | L | R | T | E | N | T | E | I | H | S | D | N | Y | G | G | P | G | D | K | I | T | I | C | N | G | S | T | I | V | D | R | L | G | S | E | L | G | C | Y | T | I | N | R | V | K | S | F | K | L | C | E | N | S | A | T | G | K | S | C | E | I | D | S | T | P | V |   |
| ABB30032.1 | A   | S | S   | G | S   | R | R   | L | L   | S | E | E | S | G | D | D | C | I | S | R | T | Q | L | L | R | T | E | T | A | E | I | H | G | N | Y | G | G | P | G | D | K | I | T | I | C | N | G | S | T | I | V | D | R | L | G | S | E | L | G | C | Y | T | I | N | R | V | K | S | F | K | L | C | E | N | S | A | T | G | K | S | C | E | I | D | S | T | P | V |   |
| ABB30033.1 | A   | S | S   | G | S   | R | R   | L | L   | S | E | E | S | G | D | D | C | I | S | R | T | Q | L | L | R | T | E | T | A | E | I | H | S | D | N | Y | G | G | P | G | D | K | I | T | I | C | N | G | S | T | I | V | D | R | L | G | S | E | L | G | C | Y | T | I | N | R | V | K | S | F | K | L | C | E | N | S | A | T | G | K | S | C | E | I | D | S | T | P | V |
| AIE16134.1 | A   | S | S   | G | S   | R | R   | L | L   | S | E | E | S | D | D | C | I | S | R | T | Q | L | L | R | T | E | T | A | E | I | H | S | D | N | Y | G | G | P | G | D | K | I | T | I | C | N | G | S | T | I | V | D | R | L | G | S | E | L | G | C | Y | T | I | N | R | V | K | S | F | K | L | C | E | N | S | A | T | G | K | S | C | E | I | D | S | T | P | V |   |
| ABB30035.1 | A   | S | S   | G | S   | R | R   | L | L   | S | E | E | S | G | D | D | C | I | S | R | T | Q | L | L | R | T | E | T | E | I | H | S | D | N | Y | G | G | P | G | D | K | I | T | I | C | N | G | S | T | I | V | D | R | L | G | S | E | L | G | C | Y | T | I | N | R | V | K | S | F | K | L | C | E | N | S | A | T | G | K | S | C | E | I | D | S | T | P | V |   |
| AIE16135.1 | A   | S | S   | G | S   | R | R   | L | L   | S | E | E | S | D | D | C | I | S | R | T | Q | L | L | R | T | E | T | E | I | H | S | D | N | Y | G | G | P | G | D | K | I | T | I | C | N | G | S | T | I | V | D | R | L | G | S | E | L | G | C | Y | T | I | N | R | V | K | S | F | K | L | C | E | N | S | A | T | G | K | S | C | E | I | D | S | T | P | V |   |   |
| AAK52742.1 | A   | S | A   | G | S   | R | R   | L | L   | S | E | E | S | G | D | D | C | I | S | R | T | Q | L | L | R | T | E | T | A | E | I | V | H | G | N | Y | G | G | P | G | D | K | I | T | I | C | N | G | S | T | I | V | D | R | L | G | S | E | L | G | C | Y | T | I | N | R | V | K | S | F | K | L | C | E | N | S | G | T | G | K | S | C | E | I | D | K | H | P | V |
| BAB84572.1 | A   | S | A   | G | S   | R | R   | L | L   | S | E | E | S | G | D | D | C | I | S | R | T | Q | L | L | R | T | E | T | A | E | I | V | H | G | N | Y | G | G | P | G | D | K | I | T | I | C | N | G | S | T | I | V | D | R | L | G | S | E | L | G | C | Y | T | I | N | R | V | K | S | F | K | L | C | E | N | S | A | T | G | K | S | C | E | I | D | S | T | P | V |
| Consensus  | A   | S | S   | G | S   | R | R   | L | L   | S | E | E | S | G | D | D | C | I | S | R | T | Q | L | L | R | T | E | T | A | E | I | H | S | D | N | Y | G | G | P | G | D | K | I | T | I | C | N | G | S | T | I | V | D | R | L | G | S | E | L | G | C | Y | T | I | N | R | V | K | S | F | K | L | C | E | N | S | A | T | G | K | S | C | E | I | D | S | T | P | V |

|            | 380        | 400        | 420        | 440        |             |            |            |            |            |
|------------|------------|------------|------------|------------|-------------|------------|------------|------------|------------|
| AAM48107.1 | KCRQGFCLKI | TQEGRGHVKL | SRGSEVYLDA | CDSSCEIMIP | KGTGDIIVLDC | SGGQQHFLDK | NLIDLGCNPI | PLLGKMAIYI | CRMSNHPKTT |
| BAB84577.1 | KCRQGFCLKI | TQEGRGHVKL | SRGSEVYLDA | CDSSCEIMIP | KGTGDIIVLDC | SGGQQHFLDK | NLIDLGCNPI | PLLGKMAIYI | CRMSNHPKTT |
| BAB84578.1 | KCRQGFCLKI | TQEGRGHVKL | SRGSEVYLDA | CDSSCEIMIP | KGTGDIIVLDC | SGGQQHFLDK | NLIDLGCNPI | PLLGKMAIYI | CRMSNHPKTT |
| AAK18286.1 | KCRQGFCLKI | TQEGRGHVKL | SRGSEVYLDA | CDSSCEIMIP | KGTGDIIVLDC | SGGQQHFLDK | NLIDLGCNPI | PLLGKMAIYI | CRMSNHPKTT |
| AAK52743.1 | KCRQGFCLKI | TQEGRGHVKL | SRGSEVYLDA | CESSCEIMIP | KGTGDIIVLDC | SGGQQHFLDK | NLIDLGCNPI | PLLGKMAIYI | CRMSNHPKTT |
| AAW84284.1 | KCRQGFCLKI | TQEGRGHVKL | SRGSEVYLDA | CDSSCEIMIP | KGTGDIIVLDC | SGGQQHFLDK | NLIDLGCNPI | PLLGKMAIYI | CRMSNHPKTT |
| ABB30029.1 | KCRQGFCLKI | TQEGRGHVKL | SRGSEVYLDA | CDSSCEIMIP | KGTGDIIVLDC | SGGQQHFLDK | NLIDLGCNPI | PLLGKMAIYI | CRMSNHPKTT |
| AIE16128.1 | KCRQGFCLKI | TQEGRGHVKL | SRGSEVYLDA | CDSSCEIMIP | KGTGDIIVLDC | SGGQQHFLDK | NLIDLGCNPI | PLLGKMAIYI | CRMSNHPKTT |
| AIE16130.1 | RCRQGFCLKI | TQEGRGHVKL | SRGSEVYLDA | CDSSCEIMIP | KGTGDIIVLDC | SGGQQHFLDK | NLIDLGCNPI | PLLGKMAIYI | CRMSNHPKTT |
| AIE16129.1 | RCRQGFCLKI | TQEGRGHVKL | SRGSEVYLDA | CDSSCEIMIP | KGTGDIIVLDC | SGGQQHFLDK | NLIDLGCNPI | PLLGKMAIYI | CRMSNHPKTT |
| AIE16131.1 | RCRQGFCLKI | TQEGRGHVKL | SRGSEVYLDA | CDSSCEIMIP | KGTGDIIVLDC | SGGQQHFLDK | NLIDLGCNPI | PLLGKMAIYI | CRMSNHPKTT |
| AIE16133.1 | KCRQGFCLKI | TQEGRGHVKL | SRGSEVYLDA | CDSSCEIMIP | KGTGDIIVLDC | SGGQQHFLDK | NLIDLGCNPI | PLLGKMAIYI | CRMSNHPKTT |
| AIE16132.1 | RCRQGFCLKI | TQEGRGHVKL | SRGSEVYLDA | CDSSCEIMIP | KGTGDIIVLDC | SGGQQHFLDK | NLIDLGCNPI | PLLGKMAIYI | CRMSNHPKTT |
| ABB30032.1 | KCKQGFCLKI | TQEGRGHVKL | SRDSEVYLDA | CDSSCEIMIP | KGTGDIIVLDC | SGGQQHFLDK | NLIDLGCNPI | PLLGKMAIYI | CRMSNHPKTT |
| ABB30033.1 | KCRQGFCLKI | TQEGRGHVKL | SRGSEIYLDA | CDSSCEIMIP | KGTGDIIVLDC | SGGQQHFLDK | NLIDLGCNPI | PLLGKMAIYI | CRMSNHPKTT |
| AIE16134.1 | KCRQGFCLKI | TQEGRGHVKL | SRGSEIYLDA | CDSSCEIMIP | KGTGDIIVLDC | SGGQQHFLDK | NLIDLGCNPI | PLLGKMAIYI | CRMSNHPKTT |
| ABB30035.1 | KCRQGFCLKI | TQEGRGHVKL | SRGSEIYLDA | CDSNCEIMIP | KGTGDIIVLDC | SGGQQHFLDK | NLIDLGCNPI | PLLGKMAIYI | CRMSNHPKTT |
| AIE16135.1 | KCRQGFCLKI | TQEGRGHVKL | SRGSEIYLDA | CDSNCEIMIP | KGTGDIIVLDC | SGGQQHFLDK | NLIDLGCNPI | PLLGKMAIYI | CRMSNHPKTT |
| AAK52742.1 | KCRQGFCLKI | TQEGRGHVKL | SRGSEVYLDA | CDSSCEIMIP | KGTGDIIVLDC | SGGQQHFLDK | NLIDLGCNPI | PLLGKMAIYI | CRMSNHPKTT |
| BAB84572.1 | KCRQGFCLKI | TQEGRGHVKL | SRGSEVYLDA | CDSSCEIMIP | KGTGDIIVLDC | SGGQQHFLDK | NLIDLGCNPI | PLLGKMAIYI | CRMSNHPKTT |
| Consensus  | KCRQGFCLKI | TQEGRGHVKL | SRGSEVYLDA | CDSSCEIMIP | KGTGDIIVLDC | SGGQQHFLDK | NLIDLGCNPI | PLLGKMAIYI | CRMSNHPKTT |

|            | 460 |   |   |   |   |   |   |   |   |   | 480 |   |   |   |   |   |   |   |   |   | 500 |   |   |   |   |   |   |   |   |   | 520 |   |   |   |   |   |   |   |   |   | 540 |   |   |   |   |   |   |   |   |   |   |   |   |   |   |   |   |   |   |   |   |   |   |   |   |   |   |   |   |   |   |   |   |   |   |   |   |   |   |   |   |   |   |   |   |   |
|------------|-----|---|---|---|---|---|---|---|---|---|-----|---|---|---|---|---|---|---|---|---|-----|---|---|---|---|---|---|---|---|---|-----|---|---|---|---|---|---|---|---|---|-----|---|---|---|---|---|---|---|---|---|---|---|---|---|---|---|---|---|---|---|---|---|---|---|---|---|---|---|---|---|---|---|---|---|---|---|---|---|---|---|---|---|---|---|---|---|
|            | I   |   |   |   |   |   |   |   |   |   | I   |   |   |   |   |   |   |   |   |   | I   |   |   |   |   |   |   |   |   |   | I   |   |   |   |   |   |   |   |   |   | I   |   |   |   |   |   |   |   |   |   |   |   |   |   |   |   |   |   |   |   |   |   |   |   |   |   |   |   |   |   |   |   |   |   |   |   |   |   |   |   |   |   |   |   |   |   |
| AAM48107.1 | M   | V | F | L | W | F | S | F | G | Y | V   | T | C | L | C | K | V | I | F | Y | L   | L | I | V | G | T | L | G | K | K | F   | K | Q | Y | R | E | L | K | P | Q | T   | C | T | C | I | C | E | T | T | P | N | N | A | D | A | E | M | H | D | L | N | C | S | Y | N | I | C | P | Y | C | A | S | R | L | T | S | D | G | L | A | R | H | V | M | Q | C |
| BAB84577.1 | M   | A | F | L | W | F | S | F | G | Y | V   | T | C | L | C | K | V | I | F | Y | L   | L | I | V | G | T | L | G | K | K | F   | K | Q | Y | R | E | L | K | P | Q | T   | C | T | C | I | C | E | T | T | P | N | N | A | D | A | E | M | H | D | L | N | C | S | Y | N | I | C | P | Y | C | A | S | R | L | T | S | D | G | L | A | R | H | V | M | Q | C |
| BAB84578.1 | M   | G | F | L | W | F | S | F | G | Y | V   | T | C | L | C | K | V | I | F | Y | L   | L | I | V | G | T | L | G | K | K | F   | K | Q | Y | R | E | L | K | P | Q | T   | C | T | C | I | C | E | T | T | P | N | N | A | D | A | E | M | H | D | L | N | C | S | Y | N | I | C | P | Y | C | A | S | R | L | T | S | D | G | L | A | R | H | V | M | Q | C |
| AAK18286.1 | M   | G | F | L | W | F | S | F | G | Y | V   | T | C | L | C | K | G | I | F | Y | L   | L | I | V | G | T | L | G | K | K | F   | K | Q | Y | R | E | L | K | P | Q | T   | C | T | C | I | C | E | T | T | P | N | N | A | D | A | E | M | H | D | L | N | C | S | Y | N | I | C | P | Y | C | A | S | R | L | T | S | D | G | L | A | R | H | V | M | Q | C |
| AAK52743.1 | M   | A | F | L | W | F | S | F | G | Y | V   | T | C | L | C | K | V | I | F | Y | L   | L | I | V | G | T | L | G | K | K | F   | K | Q | Y | R | E | L | K | P | Q | T   | C | T | C | I | C | E | T | T | P | N | N | A | D | A | E | M | H | D | L | N | C | S | Y | N | I | C | P | Y | C | A | S | R | L | T | S | D | G | L | A | R | H | V | M | Q | C |
| AAW84284.1 | M   | A | F | L | W | F | S | F | G | Y | V   | T | C | L | C | K | V | I | F | Y | L   | L | I | V | G | T | L | G | K | K | F   | K | Q | Y | R | E | L | K | P | Q | T   | C | T | C | I | C | E | T | T | P | N | N | A | D | A | E | M | H | D | L | N | C | S | Y | N | I | C | P | Y | C | A | S | R | L | T | S | D | G | L | A | R | H | V | M | Q | C |
| ABB30029.1 | M   | A | F | L | W | F | S | F | G | Y | V   | T | C | L | C | K | V | I | F | Y | L   | L | I | V | G | T | L | G | K | K | F   | K | Q | Y | R | E | L | K | P | Q | T   | C | T | C | I | C | E | T | T | P | N | N | A | D | A | E | M | H | D | L | N | C | S | Y | N | I | C | P | Y | C | A | S | R | L | T | S | D | G | L | A | R | H | V | M | Q | C |
| AIE16128.1 | M   | A | F | L | W | F | S | F | G | Y | V   | T | C | L | C | K | A | I | F | Y | L   | L | I | V | G | T | L | G | K | K | F   | K | Q | Y | R | E | L | K | P | Q | T   | C | T | C | I | C | E | T | T | P | N | N | A | D | A | E | M | H | D | L | N | C | S | Y | N | I | C | P | Y | C | A | S | R | L | T | S | D | G | L | A | R | H | V | M | Q | C |
| AIE16130.1 | M   | A | F | L | W | F | S | F | G | Y | V   | T | C | L | C | K | V | I | F | Y | L   | L | I | V | G | T | L | G | K | K | F   | K | Q | Y | R | E | L | K | P | Q | T   | C | T | C | I | C | E | T | T | P | N | N | A | D | A | E | M | H | D | L | N | C | S | Y | N | I | C | P | Y | C | A | S | R | L | T | S | D | G | L | A | R | H | V | M | Q | C |
| AIE16129.1 | M   | A | F | L | W | F | S | F | G | Y | V   | T | C | L | C | K | V | I | F | Y | L   | L | I | V | G | T | L | G | K | K | F   | K | Q | Y | R | E | L | K | P | Q | T   | C | T | C | I | C | E | T | T | P | N | N | A | D | A | E | M | H | D | L | N | C | S | Y | N | I | C | P | Y | C | A | S | R | L | T | S | D | G | L | A | R | H | V | M | Q | C |
| AIE16131.1 | M   | V | F | L | W | F | S | F | G | Y | V   | T | C | L | C | K | V | I | F | Y | L   | L | I | V | G | T | L | G | K | K | F   | K | Q | Y | R | E | L | K | P | Q | T   | C | T | C | I | C | E | T | T | P | N | N | A | D | A | E | M | H | D | L | N | C | S | Y | N | I | C | P | Y | C | A | S | R | L | T | S | D | G | L | A | R | H | V | M | Q | C |
| AIE16133.1 | M   | G | F | L | W | F | S | F | G | Y | V   | T | C | L | C | K | V | I | F | Y | L   | L | I | V | G | T | L | G | K | K | F   | K | Q | Y | R | E | L | K | P | Q | T   | C | T | C | I | C | E | T | T | P | N | N | A | D | A | E | M | H | D | L | N | C | S | Y | N | I | C | P | Y | C | A | S | R | L | T | S | D | G | L | A | R | H | V | M | Q | C |
| AIE16132.1 | M   | G | F | L | W | F | S | F | G | Y | V   | T | C | L | C | K | V | I | F | Y | L   | L | I | V | G | T | L | G | K | K | F   | K | Q | Y | R | E | L | K | P | Q | T   | C | T | C | I | C | E | T | T | P | N | N | A | D | A | E | M | H | D | L | N | C | S | Y | N | I | C | P | Y | C | A | S | R | L | T | S | D | G | L | A | R | H | V | M | Q | C |
| ABB30032.1 | M   | A | F | L | W | F | S | F | G | Y | V   | T | C | L | C | K | V | I | F | Y | L   | L | I | V | G | T | L | G | K | K | F   | K | Q | Y | R | E | L | K | P | Q | T   | C | T | C | I | C | E | T | T | P | N | N | A | D | A | E | M | H | D | L | N | C | S | Y | N | I | C | P | Y | C | A | S | R | L | T | S | D | G | L | A | R | H | V | M | Q | C |
| ABB30033.1 | M   | A | F | L | W | F | S | F | G | Y | V   | T | C | L | C | K | V | I | F | Y | L   | L | I | V | G | T | L | G | K | K | F   | K | Q | Y | R | E | L | K | P | Q | T   | C | T | C | I | C | E | T | T | P | N | N | A | D | A | E | M | H | D | L | N | C | S | Y | N | I | C | P | Y | C | A | S | R | L | T | S | D | G | L | A | R | H | V | M | Q | C |
| AIE16134.1 | M   | A | F | L | W | F | S | F | G | Y | V   | T | C | L | C | K | V | I | F | Y | L   | L | I | V | G | T | L | G | K | K | F   | K | Q | Y | R | E | L | K | P | Q | T   | C | T | C | I | C | E | T | T | P | N | N | A | D | A | E | M | H | D | L | N | C | S | Y | N | I | C | P | Y | C | A | S | R | L | T | S | D | G | L | A | R | H | V | M | Q | C |
| ABB30035.1 | M   | A | F | L | W | F | S | F | G | Y | V   | T | C | L | C | K | V | I | F | Y | L   | L | I | V | G | T | L | G | K | K | F   | K | Q | Y | R | E | L | K | P | Q | T   | C | T | C | I | C | E | T | T | P | N | N | A | D | A | E | M | H | D | L | N | C | S | Y | N | I | C | P | Y | C | A | S | R | L | T | S | D | G | L | A | R | H | V | M | Q | C |
| AIE16135.1 | M   | A | F | L | W | F | S | F | G | Y | V   | T | C | L | C | K | V | I | F | Y | L   | L | I | V | G | T | L | G | K | K | F   | K | Q | Y | R | E | L | K | P | Q | T   | C | T | C | I | C | E | T | T | P | N | N | A | D | A | E | M | H | D | L | N | C | S | Y | N | I | C | P | Y | C | A | S | R | L | T | S | D | G | L | A | R | H | V | M | Q | C |
| AAK52742.1 | M   | A | F | L | W | F | S | F | G | Y | V   | T | C | L | C | K | V | I | F | Y | L   | L | I | V | G | T | L | G | K | K | F   | K | Q | Y | R | E | L | K | P | Q | T   | C | T | C | I | C | E | T | T | P | N | N | A | D | A | E | M | H | D | L | N | C | S | Y | N | I | C | P | Y | C | A | S | R | L | T | S | D | G | L | A | R | H | V | M | Q | C |
| BAB84572.1 | M   | A | F | L | W | F | S | F | G | Y | V   | T | C | L | C | K | I | I | F | Y | L   | L | I | V | G | T | L | G | K | K | F   | K | Q | Y | R | E | L | K | P | Q | T   | C | T | C | I | C | E | T | T | P | N | N | A | D | A | E | M | H | D | L | N | C | S | Y | N | I | C | P | Y | C | A | S | R | L | T | S | D | G | L | A | R | H | V | M | Q | C |
| Consensus  | M   | A | F | L | W | F | S | F | G | Y | V   | T | C | L | C | K | V | I | F | Y | L   | L | I | V | G | T | L | G | K | K | F   | K | Q | Y | R | E | L | K | P | Q | T   | C | T | C | I | C | E | T | T | P | N | N | A | D | A | E | M | H | D | L | N | C | S | Y | N | I | C | P | Y | C | A | S | R | L | T | S | D | G | L | A | R | H | V | M | Q | C |

|            |            |            |            |            |            |            |             |            |            |  |  |  |  |     |  |  |  |  |     |  |
|------------|------------|------------|------------|------------|------------|------------|-------------|------------|------------|--|--|--|--|-----|--|--|--|--|-----|--|
|            |            |            |            | 560        |            |            |             |            | 580        |  |  |  |  | 600 |  |  |  |  | 620 |  |
| AAM48107.1 | PKRKEKIEET | ELYLNLERIP | WVVRKLLQVS | ESTGVALKRS | SWLVVLLVLL | TVSLSPVQSA | PIGHGKTIVET | YQIREGYTSN | CLFVLGSILF |  |  |  |  |     |  |  |  |  |     |  |
| BAB84577.1 | PKRKEKIEET | ELYLNLERIP | WVVRKLLQVS | ESTGVALKRS | SWLVVLLVLL | TVSLSPVQSA | PIGHGKTIVET | YQIREGYTSN | CLFVLGSILF |  |  |  |  |     |  |  |  |  |     |  |
| BAB84578.1 | PKRKEKIEET | ELYLNLERIP | WVVRKLLQVS | ESTGVALKRS | SWLVVLLVLL | TVSLSPVQSA | PIGHGKTIVET | YQIREGYTSN | CLFVLGSILF |  |  |  |  |     |  |  |  |  |     |  |
| AAK18286.1 | PKRKEKIEET | ELYLNLERIP | WVVRKLLQVS | ESTGVALKRS | SWLVVLLVLL | TVSLSPVQSA | PIGHGKTIVET | YQIREGYTSN | CLFVLGSILF |  |  |  |  |     |  |  |  |  |     |  |
| AAK52743.1 | PKRKEKIEET | ELYLNLERIP | WVVRKLLQVS | ESTGVALKRS | SWLVVLLVLL | TVSLSPVQSA | PIGHGKTIVET | YQIREGYTSN | CLFVLGSILF |  |  |  |  |     |  |  |  |  |     |  |
| AAW84284.1 | PKRKEKVEET | ELYLNLERIP | WVVRKLLQVS | ESTGVALKRS | SWLVVLLVLL | TVSLSPVQSA | PIGHGKTIVET | YQIREGYTSN | CLFVLGSILF |  |  |  |  |     |  |  |  |  |     |  |
| ABB30029.1 | PKRKEKVEET | ELYLNLERIP | WVVRKLLQVS | ESTGVALKRS | SWLVVLLVLL | TVSLSPVQSA | PIGHGKTIVET | YQIREGYTSN | CLFVLGSILF |  |  |  |  |     |  |  |  |  |     |  |
| AIE16128.1 | PKRKEKIEET | ELYLNLERIP | WVVRKLLQVS | ESTGVALKRS | SWLVVLLVLL | TVSLSPVQSA | PISHGETVEV  | YQIREGYTSN | CLFVLGSILF |  |  |  |  |     |  |  |  |  |     |  |
| AIE16130.1 | PKRKEKIEET | ELYLNLERIP | WVVRKLLQVS | ESTGVALKRS | SWLVVLLVLL | TVSLSPVQSA | PISHGETVEV  | YQIREGYTSN | CLFVLGSILF |  |  |  |  |     |  |  |  |  |     |  |
| AIE16129.1 | PKRKEKIEET | ELYLNLERIP | WVVRKLLQVS | ESTGVALKRS | SWLVVLLVLL | TVSLSPVQSA | PISHGETVEV  | YQIREGYTSN | CLFVLGSILF |  |  |  |  |     |  |  |  |  |     |  |
| AIE16131.1 | PKRKEKIEET | ELYLNLERIP | WVVRKLLQVS | ESTGVALKRS | SWLVVLLVLL | TVSLSPVQSA | PISHGETVEV  | YQIREGYTSN | CLFVLGSILF |  |  |  |  |     |  |  |  |  |     |  |
| AIE16133.1 | PKRKEKIEET | ELYLNLERIP | WVVRKLLQVS | ESTGVALKRS | SWLVVLLVLL | TVSLSPVQSA | PISHGETVEV  | YQIREGYTSN | CLFVLGSILF |  |  |  |  |     |  |  |  |  |     |  |
| AIE16132.1 | PKRKEKIEET | ELYLNLERIP | WVVRKLLQVS | ESTGVALKRS | SWLVVLLVLL | TVSLSPVQSA | PISHGETVEV  | YQIREGYTSN | CLFVLGSILF |  |  |  |  |     |  |  |  |  |     |  |
| ABB30032.1 | PKRKEKIEET | ELYLNLERIP | WVVRKLLQVS | ESTGVALKRS | SWLVVLLVLL | TVSLSPVQSA | PIGHGKTIVET | YQIREGYTSN | CLFVLGSILF |  |  |  |  |     |  |  |  |  |     |  |
| ABB30033.1 | PKRKEKIEET | ELYLNLERIP | WVVRKLLQVS | ESTGVALKRS | SWLVVLLVLL | TVSLSPVQSA | PIGHGKTIVET | YQIREGYTSN | CLFVLGSILF |  |  |  |  |     |  |  |  |  |     |  |
| ABB30035.1 | PKRKEKVEET | ELYLNLERIP | WVVRKLLQVS | ESTGVALKRS | SWLVVLLVLL | TVSLSPVQSA | PIGHGKTIVET | YQIREGYTSN | CLFVLGSILF |  |  |  |  |     |  |  |  |  |     |  |
| AIE16135.1 | PKRKEKVEET | ELYLNLERIP | WVVRKLLQVS | ESTGVALKRS | SWLVVLLVLL | TVSLSPVQSA | PIGHGKTIVET | YQIREGYTSN | CLFVLGSILF |  |  |  |  |     |  |  |  |  |     |  |
| AAK52742.1 | PKRKEKVEET | ELYLNLERIP | WVVRKLLQVS | ESTGVALKRS | SWLVVLLVLL | TVSLSPVQSA | PIGHGKTIEA  | YQIREGYTSN | CLFVLGSILF |  |  |  |  |     |  |  |  |  |     |  |
| BAB84572.1 | PKRKEKVEET | ELYLNLERIP | WVVRKLLQVS | ESTGVALKRS | SWLVVLLVLL | TVSLSPVQSA | PIGHGKTIEA  | YQIREGYTSN | CLFVLGSILF |  |  |  |  |     |  |  |  |  |     |  |
| Consensus  | PKRKEKIEET | ELYLNLERIP | WVVRKLLQVS | ESTGVALKRS | SWLVVLLVLL | TVSLSPVQSA | PIGHGKTIVET | YQIREGYTSN | CLFVLGSILF |  |  |  |  |     |  |  |  |  |     |  |
|            |            | 640        |            |            |            |            |             |            |            |  |  |  |  |     |  |  |  |  |     |  |
| AAM48107.1 | IYSCLMKGLV | DS         | D          | G          | 644        |            |             |            |            |  |  |  |  |     |  |  |  |  |     |  |
| BAB84577.1 | IYSCLMKGLV | DS         | V          | G          | 644        |            |             |            |            |  |  |  |  |     |  |  |  |  |     |  |
| BAB84578.1 | IYSCLMKGLV | DS         | V          | G          | 644        |            |             |            |            |  |  |  |  |     |  |  |  |  |     |  |
| AAK18286.1 | IYSCLMKGLV | DS         | V          | G          | 644        |            |             |            |            |  |  |  |  |     |  |  |  |  |     |  |
| AAK52743.1 | IYSCLMKGLV | DS         | V          | G          | 644        |            |             |            |            |  |  |  |  |     |  |  |  |  |     |  |
| AAW84284.1 | IYSCLMKGLV | DS         | V          | G          | 644        |            |             |            |            |  |  |  |  |     |  |  |  |  |     |  |
| ABB30029.1 | IYSCLMKGLV | DS         | V          | G          | 644        |            |             |            |            |  |  |  |  |     |  |  |  |  |     |  |
| AIE16128.1 | IYSCLMRGLV | DS         | V          | S          | 644        |            |             |            |            |  |  |  |  |     |  |  |  |  |     |  |
| AIE16130.1 | IYSCLMKGLV | DS         | V          | G          | 644        |            |             |            |            |  |  |  |  |     |  |  |  |  |     |  |
| AIE16129.1 | IYSCLMKGLV | DS         | V          | G          | 644        |            |             |            |            |  |  |  |  |     |  |  |  |  |     |  |
| AIE16131.1 | IYSCLMKGLV | DS         | V          | G          | 644        |            |             |            |            |  |  |  |  |     |  |  |  |  |     |  |
| AIE16133.1 | IYSCLMKGLV | DS         | V          | G          | 644        |            |             |            |            |  |  |  |  |     |  |  |  |  |     |  |
| AIE16132.1 | IYSCLMRGLV | DS         | V          | G          | 644        |            |             |            |            |  |  |  |  |     |  |  |  |  |     |  |
| ABB30032.1 | IYSHLMKGLV | DS         | V          | G          | 644        |            |             |            |            |  |  |  |  |     |  |  |  |  |     |  |
| ABB30033.1 | IYSCLVKGLI | DS         | V          | G          | 644        |            |             |            |            |  |  |  |  |     |  |  |  |  |     |  |
| AIE16134.1 | IYSCLVKGLI | DS         | V          | G          | 644        |            |             |            |            |  |  |  |  |     |  |  |  |  |     |  |
| ABB30035.1 | IYSCLVKGLI | DS         | V          | G          | 644        |            |             |            |            |  |  |  |  |     |  |  |  |  |     |  |
| AIE16135.1 | IYSCLVKGLI | DS         | V          | G          | 644        |            |             |            |            |  |  |  |  |     |  |  |  |  |     |  |
| AAK52742.1 | IYSCLMKGLV | DS         | V          | S          | 644        |            |             |            |            |  |  |  |  |     |  |  |  |  |     |  |
| BAB84572.1 | IYSCLMKGLV | DS         | V          | S          | 644        |            |             |            |            |  |  |  |  |     |  |  |  |  |     |  |
| Consensus  | IYSCLMKGLV | DS         | V          | G          |            |            |             |            |            |  |  |  |  |     |  |  |  |  |     |  |

**C.** GP2 protein of Congo virus Asia-1 genotype multiple sequence alignment among the genomes retrieved from NCBI with accession numbers AAM48107, AAK52742, BAB84572, AIE16134, ABB30033, AIE16135, ABB30035, ABB30032, AIE16129, AIE1612B8, AIE16130, AIE16131, AIE16133, AIE16132, AAW84284, AAK52743, ABB30029, BA84577, AF338470 and BAB84578.

|            | 20 |   |   |   | 40 |   |   |   | 60 |   |   |   |   |   |   |   |   |   |   |   |   |   |   |   |   |   |   |   |   |   |   |   |   |   |   |   |   |   |   |   |   |   |   |   |   |   |   |   |   |   |   |   |   |   |   |   |   |   |   |   |   |   |   |   |   |   |   |   |   |   |   |   |   |   |    |
|------------|----|---|---|---|----|---|---|---|----|---|---|---|---|---|---|---|---|---|---|---|---|---|---|---|---|---|---|---|---|---|---|---|---|---|---|---|---|---|---|---|---|---|---|---|---|---|---|---|---|---|---|---|---|---|---|---|---|---|---|---|---|---|---|---|---|---|---|---|---|---|---|---|---|---|----|
| AAM48107.1 | S  | S | T | C | L  | H | K | E | W  | P | H | S | R | N | W | R | C | N | P | T | W | C | W | G | V | G | T | G | C | T | C | C | G | L | D | V | K | D | L | F | T | D | Y | M | F | V | K | W | K | V | E | Y | I | K | T | E | A | I | V | C | V | E | L | T | S | Q | E | R | Q | C | S | L | I | E | 74 |
| BAB84577.1 | S  | S | T | C | L  | H | K | E | W  | P | H | S | R | N | W | R | C | N | P | T | W | C | W | G | V | G | T | G | C | T | C | C | G | L | D | V | K | D | L | F | T | D | Y | M | F | V | K | W | K | V | E | Y | I | K | T | E | A | I | V | C | V | E | L | T | S | Q | E | R | Q | C | T | L | I | E | 74 |
| BAB84578.1 | S  | S | T | C | L  | H | K | E | W  | P | H | S | R | N | W | R | C | N | P | T | W | C | W | G | V | G | T | G | C | T | C | C | G | L | D | V | K | D | L | F | T | D | Y | M | F | V | K | W | K | V | E | Y | I | K | T | E | A | I | V | C | V | E | L | T | S | Q | E | R | Q | C | T | L | I | E | 74 |
| AAK18286.1 | S  | S | T | C | L  | H | K | E | W  | P | H | S | R | N | W | R | C | N | P | T | W | C | W | G | V | G | T | G | C | T | C | C | G | L | D | V | K | D | L | F | T | D | Y | M | F | V | K | W | K | V | E | Y | I | K | T | E | A | I | V | C | V | E | L | T | S | Q | E | R | Q | C | T | L | I | E | 74 |
| AAK52743.1 | S  | S | T | C | L  | H | K | E | W  | P | H | S | R | N | W | R | C | N | P | T | W | C | W | G | V | G | T | G | C | T | C | C | G | L | D | V | K | D | L | F | T | D | Y | M | F | V | K | W | K | V | E | Y | I | K | T | E | A | I | V | C | V | E | L | T | S | Q | E | R | Q | C | T | L | I | E | 74 |
| AAW84284.1 | S  | S | T | C | L  | H | K | E | W  | P | H | S | R | N | W | R | C | N | P | T | W | C | W | G | V | G | T | G | C | T | C | C | G | L | D | V | K | D | L | F | T | D | H | M | F | V | K | W | K | V | E | Y | I | K | T | E | A | I | V | C | V | E | L | T | S | Q | E | R | Q | C | S | L | I | E | 74 |
| ABB30029.1 | S  | S | T | C | L  | H | K | E | W  | P | H | S | R | N | W | R | C | N | P | T | W | C | W | G | V | G | T | G | C | T | C | C | G | L | D | V | K | D | L | F | T | D | Y | M | F | V | K | W | K | V | E | Y | I | K | T | E | A | I | V | C | V | E | L | T | S | Q | E | R | Q | C | S | L | I | E | 74 |
| AIE16128.1 | S  | S | T | C | L  | H | K | E | W  | P | H | S | R | N | W | R | C | N | P | T | W | C | W | G | V | G | T | G | C | T | C | C | G | L | D | V | K | D | L | F | T | D | Y | M | F | V | K | W | K | V | D | Y | I | K | T | E | A | I | V | C | V | E | L | T | S | Q | E | R | Q | C | S | L | I | E | 74 |
| AIE16130.1 | S  | S | T | C | L  | H | K | E | W  | P | H | S | R | N | W | R | C | N | P | T | W | C | W | G | V | G | T | G | C | T | C | C | G | L | D | V | K | D | L | F | T | D | Y | M | F | V | K | W | K | V | D | Y | I | K | T | E | A | I | V | C | V | E | L | T | S | Q | E | R | Q | C | S | L | I | E | 74 |
| AIE16129.1 | S  | S | T | C | L  | H | K | E | W  | P | H | S | R | N | W | R | C | N | P | T | W | C | W | G | V | G | T | G | C | T | C | C | G | L | D | V | K | D | L | F | T | D | Y | M | F | V | K | W | K | V | D | Y | I | K | T | E | A | I | V | C | V | E | L | T | S | Q | E | R | Q | C | S | L | I | E | 74 |
| AIE16131.1 | S  | S | T | C | L  | H | K | E | W  | P | H | S | R | N | W | R | C | N | P | T | W | C | W | G | V | G | T | G | C | T | C | C | G | L | D | V | K | D | L | F | T | D | Y | M | F | V | K | W | K | V | D | Y | I | K | T | E | A | I | V | C | V | E | L | T | S | Q | E | R | Q | C | S | L | I | E | 74 |
| AIE16133.1 | S  | S | T | C | L  | H | K | E | W  | P | H | S | R | N | W | R | C | N | P | T | W | C | W | G | V | G | T | G | C | T | C | C | G | L | D | V | K | D | L | F | T | D | Y | M | F | V | K | W | K | V | D | Y | I | K | T | E | A | I | V | C | V | E | L | T | S | Q | E | R | Q | C | S | L | I | E | 74 |
| AIE16132.1 | S  | S | T | C | L  | H | K | E | W  | P | H | S | R | N | W | R | C | N | P | T | W | C | W | G | V | G | T | G | C | T | C | C | G | L | D | V | K | D | L | F | T | D | Y | M | F | V | K | W | K | V | D | Y | I | K | T | E | A | I | V | C | V | E | L | T | S | Q | E | R | Q | C | S | L | I | E | 74 |
| ABB30032.1 | S  | S | T | C | L  | H | K | E | W  | P | H | S | R | N | W | R | C | N | P | T | W | C | W | G | V | G | T | G | C | T | C | C | G | L | D | V | K | D | L | F | T | D | Y | M | F | V | K | W | K | V | E | Y | I | K | T | E | A | I | V | C | V | E | L | T | S | Q | E | R | Q | C | S | L | I | E | 74 |
| ABB30033.1 | S  | S | T | C | L  | H | K | E | W  | P | H | S | R | N | W | R | C | N | P | T | W | C | W | G | V | G | T | G | C | T | C | C | G | L | D | V | K | D | L | F | T | D | Y | M | F | V | K | W | K | V | E | Y | I | K | T | E | A | I | V | C | V | E | L | T | S | Q | E | R | Q | C | S | L | I | E | 74 |
| AIE16134.1 | S  | S | T | C | L  | H | K | E | W  | P | H | S | R | N | W | R | C | N | P | T | W | C | W | G | V | G | T | G | C | T | C | C | G | L | D | V | K | D | L | F | T | D | Y | M | F | V | K | W | K | V | E | Y | I | K | T | E | A | I | V | C | V | E | L | T | S | Q | E | R | Q | C | S | L | I | E | 74 |
| ABB30035.1 | S  | S | T | C | L  | H | K | E | W  | P | H | S | R | N | W | R | C | N | P | T | W | C | W | G | V | G | T | G | C | T | C | C | G | L | D | V | K | D | L | F | T | D | Y | M | F | V | K | W | K | V | E | Y | I | K | T | E | A | I | V | C | V | E | L | T | S | Q | E | R | Q | C | S | L | I | E | 74 |
| AIE16135.1 | S  | S | T | C | L  | H | K | E | W  | P | H | S | R | N | W | R | C | N | P | T | W | C | W | G | V | G | T | G | C | T | C | C | G | L | D | V | K | D | L | F | T | D | Y | M | F | V | K | W | K | V | E | Y | I | K | T | E | A | I | V | C | V | E | L | T | S | Q | E | R | Q | C | S | L | I | E | 74 |
| AAK52742.1 | S  | S | T | C | L  | H | K | E | W  | P | H | S | R | N | W | R | C | N | P | T | W | C | W | G | V | G | T | G | C | T | C | C | G | L | D | V | K | D | L | F | T | D | Y | M | F | V | K | W | K | V | E | Y | I | K | T | E | A | I | V | C | V | E | L | T | S | Q | E | R | Q | C | S | L | I | E | 74 |
| BAB84572.1 | S  | S | T | C | L  | H | K | E | W  | P | H | S | R | N | W | R | C | N | P | T | W | C | W | G | V | G | T | G | C | T | C | C | G | L | D | V | K | D | L | F | T | D | Y | M | F | V | K | W | K | V | E | Y | I | K | T | E | A | I | V | C | V | E | L | T | S | Q | E | R | Q | C | S | L | I | E | 74 |
| Consensus  | S  | S | T | C | L  | H | K | E | W  | P | H | S | R | N | W | R | C | N | P | T | W | C | W | G | V | G | T | G | C | T | C | C | G | L | D | V | K | D | L | F | T | D | Y | M | F | V | K | W | K | V | E | Y | I | K | T | E | A | I | V | C | V | E | L | T | S | Q | E | R | Q | C | S | L | I | E |    |
